# Supplementary material for: Transition-metal-free three-component coupling approach to QUINAP derivatives
Source: Royal Society of Chemistry journal article supplement (doi:10.1039/d1ob02504j), 2022-01-01

## Supporting Information

### A Transition-Metal Free Three-Component Coupling Approach to Quinap Derivates

Xin-Wei Guo,<sup>b</sup> Li-Xia Quan,<sup>\*,a</sup> Xian-Hong Zhu,<sup>a</sup> Fa-Yun Chen,<sup>a</sup> An-Xi Zhou,<sup>a</sup> Liu-Liang Mao,<sup>\*,a</sup> Jie-Ping Wan<sup>c</sup> and Shang-Dong Yang<sup>b</sup>

<sup>a</sup> College of Chemistry and Environment Science, Shangrao Normal University, Shangrao, Jiangxi 334001, China

<sup>b</sup> State Key Laboratory of Applied Organic Chemistry, Lanzhou University, Lanzhou, Gansu 730000, P. R. China

<sup>c</sup> College of Chemistry and Chemical Engineering, Jiangxi Normal University, Nanchang, Jiangxi 330022, P. R. China

#### Contents:

|                                                   |    |
|---------------------------------------------------|----|
| 1. General information.....                       | 1  |
| 2. Preparation of starting material .....         | 1  |
| 3. Optimization of Reaction Condition.....        | 6  |
| 4. The General Procedures.....                    | 8  |
| 5. Mechanism explaining the regioselectivity..... | 9  |
| 6. Characterization of product.....               | 10 |
| 7. References.....                                | 20 |
| 8. Copies of NMR spectra.....                     | 20 |

## 1. General Information

Commercial reagents were purchased from commercial suppliers and used without further purification. All dry solvents were treated according to standard procedures prior to use unless otherwise noted. Thin-layer chromatography (TLC) was performed using 60 mesh silica gel plates visualized with short-wavelength UV light (254 nm). Column chromatography was performed using silica gel (200–300 mesh).  $^1\text{H}$  and  $^{13}\text{C}$  NMR spectra were recorded on a Bruker instrument 400 (400 MHz for  $^1\text{H}$ , 100 MHz for  $^{13}\text{C}$  and 162 MHz for  $^{31}\text{P}$ ) in  $\text{CDCl}_3$  or Bruker instrument 300 (300 MHz for  $^1\text{H}$ , 75 MHz for  $^{13}\text{C}$  and 121 MHz for  $^{31}\text{P}$ ) using  $\text{CDCl}_3$  as the solvent and tetramethyl silane (TMS) as internal reference. TMS Chemical shifts ( $\delta$ ) were measured in ppm relative to TMS  $\delta = 0$  for  $^1\text{H}$ , or to chloroform  $\delta = 77.0$  for  $^{13}\text{C}$  as internal standard. The following abbreviations (or combinations there of) were used to explain multiplicities: s = singlet, d = doublet, t = triplet, q = quartet, m = multiplet, br = broad signals. The  $^1\text{H}$  NMR spectra are reported as follows: chemical shift  $\delta$  in ppm relative to TMS ( $\delta = 0$  ppm), multiplicity, coupling constant  $J$ , are reported in hertz, number of protons.  $^{13}\text{C}$  NMR spectra are reported as follows: chemical shift  $\delta$  in ppm relative to  $\text{CDCl}_3$  ( $\delta = 77.0$  ppm), multiplicity, coupling constant  $J$ , are reported in hertz. Mass spectroscopy data of the products were collected on a Bruker esquire 6000 instrument using ESI ionization.

## 2. Preparation of starting materials

Substituted aniline **1a-1k**, were purchased from commercial source, and used without further purification.

### Synthesis of substituted Alkyne

Substituted alkyne **2a-2e** and **2i-2m** were purchased from commercial source, and used without further purification. **2f**<sup>[1][2]</sup>, **2g**<sup>[3]</sup> was prepared according to corresponding literatures.

Procedure to prepare **2f**<sup>[1][2]</sup>:

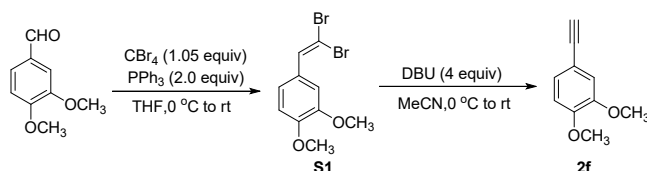

To a solution of the veratraldehyde (0.83 g, 5.0 mmol) in 10 ml dry DCM, carbon tetrabromide (1.74 g, 5.25 mmol) was added. The mixture was cooled to  $0\text{ }^\circ\text{C}$ , and a solution of triphenylphosphine (2.62 g, 10.0 mmol) in 10 mL dry DCM was added dropwise. The reaction mixture was allowed to gradually warm up to room temperature and stirred overnight at room temperature. The reaction mixture was quenched with water, and the organic layer was separated and washed with brine. The crude mixture concentrated under vacuum, and purified by flash column chromatography get the dibromoethane derivative **S1**, yellow oil (1.45g, 90%).

To a stirred solution of dibromoethane derivative **S1** (1.45 g, 4.5 mmol) in anhydrous  $\text{CH}_3\text{CN}$  (10 mL) was added DBU (2.8 mL, 18.0 mmol) dropwise at  $0\text{ }^\circ\text{C}$ . The reaction mixture was warm to ambient temperature ( $25\text{-}30\text{ }^\circ\text{C}$ ) stir at for one day. After completion of reaction (monitored by TLC), reaction mixture quenched by dropwise addition of aqueous HCl then continued stirring for 5 mins. The reaction mixture was extracted three times with DCM; organic layers were washed with brine, solvent was evaporated under vacuum, and resulting residues were purified by flash

column chromatography to afford the **2f** as a yellow solid (0.47 g, 64%). **<sup>1</sup>H NMR** (400 MHz, CDCl<sub>3</sub>) δ 7.11 (dd, *J* = 8.6, 1.8 Hz, 1H), 6.99 (d, *J* = 1.6 Hz, 1H), 6.81 (d, *J* = 8.4 Hz, 1H), 3.89 (s, 3H), 3.88 (s, 3H), 3.01 (s, 1H); **<sup>13</sup>C NMR** (100 MHz, CDCl<sub>3</sub>) δ 149.8, 148.5, 125.4, 114.6, 114.1, 110.8, 83.7, 75.7, 55.8. **MS (ESI)**: found [M+H]<sup>+</sup> 162.1. Spectral data for this compound is consistent with that previously reported.<sup>[2]</sup>

Procedure to prepare **2g**<sup>[3]</sup>:

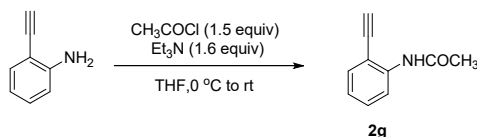

To a solution of *o*-ethynylaniline (0.227 mL, 2.0 mmol), Et<sub>3</sub>N (0.42 mL, 3.2 mmol) in THF (4 mL) was added acetyl chloride (0.21 mL, 3.0 mmol) dropwise at 0 °C. After the addition was complete, the reaction mixture was stirred at room temperature. The reaction was monitored by TLC, after completion of the reaction, the reaction was quenched by water and the resulting mixture was extracted three times with DCM. The combined extracts were washed with brine and concentrated in vacuo. The residue was purified by flash column chromatography on silica gel to afford *N*-acetyl-*o*-ethynylaniline **2g** as a white solid (0.30g, 95%). **<sup>1</sup>H NMR** (400 MHz, CDCl<sub>3</sub>) δ 8.40 (d, *J* = 8.4 Hz, 1H), 7.92 (br, 1H), 7.46 (dd, *J* = 7.6, 1.2 Hz, 1H), 7.36 (t, *J* = 8.0 Hz, 1H), 7.04 (t, *J* = 7.6 Hz, 1H), 3.51 (s, 1H), 2.23 (s, 3H). **<sup>13</sup>C NMR** (100 MHz, CDCl<sub>3</sub>) δ 168.3, 139.6, 132.1, 130.2, 123.3, 119.2, 110.4, 84.3, 79.2, 24.9. **MS (ESI)**: found [M+H]<sup>+</sup> 159.9. Spectral data for this compound is consistent with that previously reported.<sup>[3]</sup>

### Synthesis of substituted aldehyde

**General Procedure A** to prepare 3a-3d,3h<sup>[4]</sup>[5]:

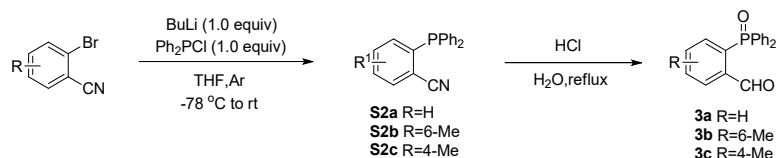

To a solution of 2-bromobenzonitrile (1.0 equiv) in dry THF under Ar at -78 °C, *n*-butyllithium (2.4M in hexane, 1.0 equiv) was added dropwise, the mixture stirs at -78 °C for 1 hours. Then the solution of Ph<sub>2</sub>PCL or Cy<sub>2</sub>PCL (1.0 equiv) in dry THF was added dropwise to the solution, the mixture was stirred for further 30 min at -78 °C, and the reaction mixture allowed to warm to room temperature stir over night, and quenched by water. The resulting mixture was extracted three times with DCM. The combined extracts concentrated in vacuo, and the residue washed by methanol to give the rough product, use in next step without further purification.

A mixture of S2 in concerned hydrochloric acid (1 mmol S2~2 mL) was refluxed at 120 °C with vigorous stirring for overnight. During this period, after cooling down to room temperature, water was added and the mixture stirred for 30 min, and the resulting mixture was extracted three times with DCM. The combined extracts were washed with brine and concentrated in vacuo. The residue was purified by flash column chromatography on silica gel to afford product.

### 2-(diphenylphosphoryl)benzaldehyde (**3a**)

2-bromobenzonitrile (9.1 g, 50.0 mmol) was following the General Procedure A. The crude mixture was purified by column chromatography (petroleum ether /ethyl acetate = 1:1) to afford a white solid (8.9 g, 60%). **<sup>1</sup>H NMR** (400 MHz, CDCl<sub>3</sub>): δ 10.75 (s, 1H), 8.21-8.10 (m, 1H), 7.74-7.46 (m, 12 H), 7.23 (dd, *J* = 13.6, 7.6Hz, 1H); **<sup>13</sup>C NMR** (100 MHz, CDCl<sub>3</sub>): δ 191.2 (d, *J*<sub>C-P</sub> =

5.6 Hz), 139.4 (d,  $J_{C-P}$  = 6.5 Hz), 135.1 (d,  $J_{C-P}$  = 95.4 Hz), 133.6 (d,  $J_{C-P}$  = 11.0 Hz), 132.8, 132.7, 132.3 (d,  $J_{C-P}$  = 2.8 Hz), 131.8 (d,  $J_{C-P}$  = 10.0 Hz), 131.6 (d,  $J_{C-P}$  = 12.8 Hz), 129.0 (d,  $J_{C-P}$  = 8.7 Hz), 128.8 (d,  $J_{C-P}$  = 12.3 Hz);  $^{31}\text{P}$  NMR (162 MHz,  $\text{CDCl}_3$ ):  $\delta$  31.05. **MS (ESI):** found  $[\text{M}+\text{H}]^+$  307.0. Spectral data for this compound is consistent with that previously reported.<sup>[5]</sup>

### 2-(diphenylphosphoryl)-6-methylbenzaldehyde (3b)

2-bromo-6-methylbenzonitrile (3.6 g, 18.5 mmol) was following the General Procedure A. The crude mixture was purified by column chromatography (petroleum ether/ethyl acetate = 1:1) to afford a white solid (2.87 g, 48%).  $^1\text{H}$  NMR (400 MHz,  $\text{CDCl}_3$ )  $\delta$  10.84 (s, 1H), 7.65 (dd,  $J$  = 12.2, 7.4 Hz, 4H), 7.58 (t,  $J$  = 7.4 Hz, 2H), 7.53-7.44 (m, 5H), 7.37 (td,  $J$  = 7.6, 2.4 Hz, 1H), 7.10 (dd,  $J$  = 14.0, 7.6 Hz, 1H), 2.62 (s, 3H);  $^{13}\text{C}$  NMR (100 MHz,  $\text{CDCl}_3$ )  $\delta$  193.4 (d,  $J_{C-P}$  = 6.7 Hz), 141.5 (d,  $J_{C-P}$  = 8.7 Hz), 137.9 (d,  $J_{C-P}$  = 6.4 Hz), 136.1 (d,  $J_{C-P}$  = 2.5 Hz), 136.0, 135.1, 133.0, 132.2 (d,  $J_{C-P}$  = 2.8 Hz), 131.9 (d,  $J_{C-P}$  = 9.8 Hz), 131.1 (d,  $J_{C-P}$  = 13.2 Hz), 128.7 (d,  $J_{C-P}$  = 12.3 Hz), 21.7;  $^{31}\text{P}$  NMR (162 MHz,  $\text{CDCl}_3$ )  $\delta$  32.38. **MS (ESI):** found  $[\text{M}+\text{H}]^+$  321.2. Spectral data for this compound is consistent with that previously reported.<sup>[5]</sup>

### 2-(diphenylphosphoryl)-4-methylbenzaldehyde (3c)

2-bromo-4-methylbenzonitrile (2.8 g, 14.4 mmol) was following the General Procedure A. The crude mixture was purified by column chromatography (petroleum ether/ethyl acetate = 1:1) to afford a white solid (2.1 g, 46 %).  $^1\text{H}$  NMR (400 MHz,  $\text{CDCl}_3$ )  $\delta$  10.62 (s, 1 H), 8.07 (qt,  $J$  = 4.0, 1.6 Hz, 1H), 7.71-7.62 (m, 4 H), 7.61-7.55 (m, 2H), 7.54-7.45 (m, 5 H), 7.08 (d,  $J$  = 14.0 Hz, 1 H), 2.35 (s, 3 H);  $^{13}\text{C}$  NMR (100 MHz,  $\text{CDCl}_3$ )  $\delta$  190.9 (d,  $J_{C-P}$  = 5.3 Hz), 143.9 (d,  $J_{C-P}$  = 11.8 Hz), 137.1 (d,  $J_{C-P}$  = 6.6 Hz), 135.4, 134.3 (d,  $J_{C-P}$  = 10.5 Hz), 133.0 (d,  $J_{C-P}$  = 2.3 Hz), 132.3 (d,  $J_{C-P}$  = 2.7 Hz), 131.9 (d,  $J_{C-P}$  = 9.9 Hz), 131.8, 129.4 (d,  $J_{C-P}$  = 9.3 Hz), 128.8 (d,  $J_{C-P}$  = 12.2 Hz), 21.9;  $^{31}\text{P}$  NMR (162 MHz,  $\text{CDCl}_3$ )  $\delta$  30.86. **MS (ESI):** found  $[\text{M}+\text{H}]^+$  321.2. Spectral data for this compound is consistent with that previously reported.<sup>[5]</sup>

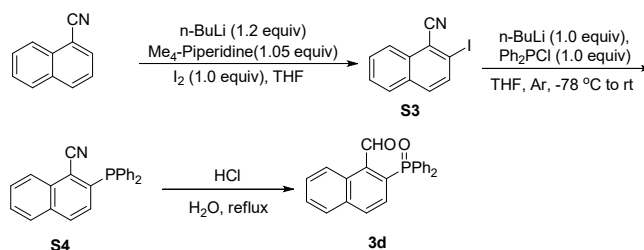

### 2-(diphenylphosphoryl)-1-naphthaldehyde (3d)

To obtain the substrate S3, n-BuLi (2.4 M in hexane, 23 mL, 1.2 equiv.) was slowly added to the 2,2,6,6-tetramethylpiperidine in THF solution at  $-5\text{ }^{\circ}\text{C}$  -  $0\text{ }^{\circ}\text{C}$ . After the reaction for 1 h, the temperature was reduced to  $-78\text{ }^{\circ}\text{C}$ , then add 1-naphthalenecarbonitrile (45.7 mmol, 1.0 equiv.) in THF slowly to the solution, continue the reaction for 1h. Then add  $\text{I}_2$  (45.7 mmol, 1.0 equiv.) solution in THF into reaction systems, continue stir at  $-78\text{ }^{\circ}\text{C}$  for 2h, slowly raise to room temperature and stir overnight, the reaction was quenched with water, the reaction solution was washed with  $\text{NaHSO}_3$  solution, and extracted three times with DCM. The organic phases were combined and the solvent was evaporated. 2-Iodo-1-naphthalenecarbonitrile was isolated by column chromatography.

1-iodo-2-naphthonitrile (9.7 g, 34.8 mmol) was following the General Procedure A. The residue was purified by column chromatography (petroleum ether/ethyl acetate = 1:2) to provide a white solid **3d** (4.3 g, 35 %),  $^1\text{H}$  NMR (400 MHz,  $\text{CDCl}_3$ )  $\delta$  11.22 (s, 1H), 8.91(d,  $J$  = 8.2 Hz, 1H), 7.96 (dd,  $J$  = 8.4, 2.2 Hz, 1H), 7.90-7.87 (m, 1H), 7.74-7.56 (m, 8H), 7.50 (td,  $J$  = 7.4, 3.0

Hz, 4H), 7.28 (dd,  $J = 12.3, 8.5$  Hz, 1H);  $^{13}\text{C}$  NMR (100 MHz,  $\text{CDCl}_3$ )  $\delta$  194.2 (d,  $J_{\text{C-P}} = 7.5$  Hz), 135.1 (d,  $J_{\text{C-P}} = 2.2$  Hz), 135.0, 134.0, 133.0, 132.4 (d,  $J_{\text{C-P}} = 2.7$  Hz), 132.3, 132.0 (d,  $J_{\text{C-P}} = 10.0$  Hz), 130.5 (d,  $J_{\text{C-P}} = 10.2$  Hz), 129.4, 128.7 (d,  $J_{\text{C-P}} = 12.3$  Hz), 128.6, 128.3, 127.9 (d,  $J_{\text{C-P}} = 11.5$  Hz), 126.6;  $^{31}\text{P}$  NMR (162 MHz,  $\text{CDCl}_3$ )  $\delta$  32.49. **MS (ESI):** found  $[\text{M}+\text{H}]^+$  357.0. Spectral data for this compound is consistent with that previously reported.<sup>[5]</sup>

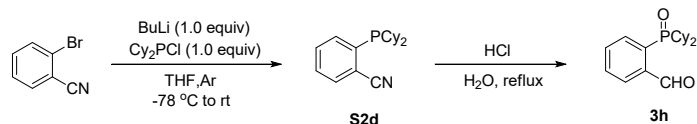

### 2-(dicyclohexylphosphoryl)benzaldehyde (3h)

2-bromobenzonitrile (4.0 g, 21.9 mmol) was following the General Procedure A. The crude mixture was purified by column chromatography (petroleum ether /ethyl acetate = 1:1) to afford a white solid **3h** (2.5 g, 36 %),  $^1\text{H}$  NMR (400 MHz,  $\text{CDCl}_3$ )  $\delta$  10.88 (br, 1H), 8.07 (s, 1H), 7.87-7.56 (m, 3H), 2.34-2.04 (m, 4H), 1.86 (d,  $J = 12.0$  Hz, 2H), 1.78-1.58 (m, 4H), 1.56-1.06 (m, 12H);  $^{13}\text{C}$  NMR (100 MHz,  $\text{CDCl}_3$ )  $\delta$  193.9, 132.7, 132.6, 132.4, 131.6, 131.4, 131.4, 36.0 (d,  $J_{\text{C-P}} = 66.6$  Hz), 26.3 (dd,  $J_{\text{C-P}} = 12.8, 10.3$  Hz), 25.7 (d,  $J_{\text{C-P}} = 2.7$  Hz), 25.6 (d,  $J_{\text{C-P}} = 0.8$  Hz), 25.1 (d,  $J_{\text{C-P}} = 1.6$  Hz);  $^{31}\text{P}$  NMR (162MHz,  $\text{CDCl}_3$ )  $\delta$  51.28. **MS (ESI):** found  $[\text{M}+\text{H}]^+$  319.2. Spectral data for this compound is consistent with that previously reported.<sup>[5]</sup>

Procedure for prepare 3e-3g<sup>[5][6][7]</sup>:

#### General Procedure B to prepare Cyclic acetal

A solution of the aldehyde (1.0 equiv), Ethylene glycol (5.0 equiv), and *p*-Toluenesulfonic acid (5.0 mol %) in toluene (10 mL/g) was heated at reflux for 24 h. After cooling to room temperature, the reaction was quenched by the addition of saturated aqueous  $\text{NaHCO}_3$ . The mixture was extracted with DCM and the combined organic was washed with water and brine, filtered and concentrated in vacuo, the crude residue was then purified by column chromatography.

#### General Procedure C to prepare Cycloacetal phosphoxide

For the Synthesis of 1,3-dioxolanes diphenyl phosphine oxide, to a solution of cyclic acetal (1.0 eq) in anhydrous THF (10 mL/g), kept in an oven-dried Schlenk flask under an atmosphere of dry argon, was added dropwise a solution of *n*-BuLi in hexane (1.0 eq) at  $-78$  °C. After stirring at  $-78$  °C for 1 h,  $\text{Ph}_2\text{PCLi}$  (1.0 eq) in anhydrous THF was added dropwise. Then the solution was stirred for 1 h at  $-78$  °C, allowed to warm to room temperature and stirred for overnight. The reaction was quenched with a solution of  $\text{NH}_4\text{Cl}$  (aq.) and the product was extracted with DCM. The combined organic layer was washed with water and brine. Filtered and the residue was purified by column chromatography to afford the product.

#### General Procedure D to prepare Aldehyde phosphoxide<sup>[7]</sup>

*p*-Toluenesulfonic acid (5 mol %) was added to a solution of 1,3-dioxolanes diphenyl phosphine oxide (1.0 eq) in a mixture of acetone/water. The mixture was refluxed until completion. After the completion of the reaction, the mixture was cooled to room temperature, and the acetone was removed under vacuum. The residue was dissolved in DCM, washed with saturated aqueous  $\text{NaHCO}_3$ , water and brine, and concentrated under vacuum. The crude product was purified by silica gel column chromatography to afford the product.

**Procedure for synthesis of 3e<sup>[7]</sup>:**

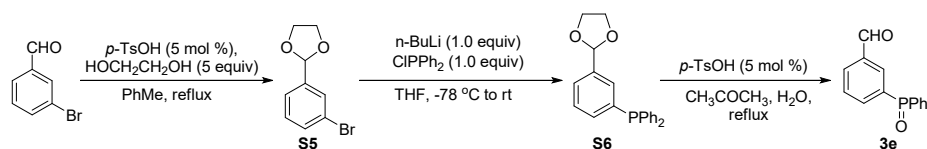

### 2-(3-bromophenyl)-1,3-dioxolane (S5)

3-bromobenzaldehyde (3.7 g, 20 mmol) was following the General Procedure B. The residue was purified by column chromatography (petroleum ether/ethyl acetate = 50:1) to afford a Colorless oily compound (3.04g, 67%).

### (3-(1,3-dioxolan-2-yl)phenyl)diphenylphosphine oxide (S6)

2-(3-bromophenyl)-1,3-dioxolane (3.04 g, 13.3 mmol) was following the General Procedure C. The residue was purified by column chromatography (petroleum ether /ethyl acetate = 1:3) to afford a white solid (1.42g, 31%).

### 3-(diphenylphosphoryl) benzaldehyde (3e)

(3-(1,3-dioxolan-2-yl)phenyl)diphenylphosphine oxide (1.42 g, 4.1 mmol) was following the General Procedure D. The residue was purified by column chromatography (petroleum ether /ethyl acetate = 1:2) to provide a white viscous substance **3e** (1.07g, 85%). <sup>1</sup>H NMR (400 MHz, CDCl<sub>3</sub>) δ 10.03 (s, 1H), 8.21-8.15 (m, 1H), 8.11-8.05 (m, 1H), 8.02-7.94 (m, 1H), 7.73-7.64 (m, 5H), 7.63-7.56 (m, 2H), 7.54-7.46 (m, 4H); <sup>13</sup>C NMR (100 MHz, CDCl<sub>3</sub>) δ 191.4, 137.5 (d, *J*<sub>C-P</sub> = 9.9 Hz), 136.2 (d, *J*<sub>C-P</sub> = 10.9 Hz), 134.3 (d, *J*<sub>C-P</sub> = 101.5 Hz), 133.6 (d, *J*<sub>C-P</sub> = 10.1 Hz), 132.3 (d, *J*<sub>C-P</sub> = 2.8 Hz), 132.2 (d, *J*<sub>C-P</sub> = 2.5 Hz), 132.0 (d, *J*<sub>C-P</sub> = 10.0 Hz), 131.0, 129.4 (d, *J*<sub>C-P</sub> = 11.5 Hz), 128.7 (d, *J*<sub>C-P</sub> = 12.2 Hz); <sup>31</sup>P NMR (162 MHz, CDCl<sub>3</sub>) δ 28.28. **MS (ESI)**: found [M+H]<sup>+</sup> 307.0. Spectral data for this compound is consistent with that previously reported.<sup>[7]</sup>

### Procedure for synthesis of 3f-3g<sup>[5]</sup>:

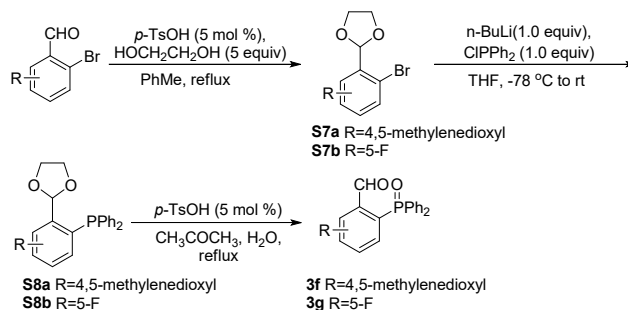

### 5-bromo-6-(1,3-dioxolan-2-yl)benzo[d][1,3]dioxole (S7a)

6-bromobenzo[d][1,3]dioxole-5-carbaldehyde (3.43 g, 14.9 mmol) was following the General Procedure B. The residue was purified by column chromatography (petroleum ether /ethyl acetate = 30:1) to afford a white solid (3.63 g, 89 %).

### (6-(1,3-dioxolan-2-yl)benzo[d][1,3]dioxol-5-yl)diphenylphosphine oxide (S8a)

5-bromo-6-(1,3-dioxolan-2-yl)benzo[d][1,3]dioxole (3.5 g, 12.9 mmol) was following the General Procedure C. The residue was purified by column chromatography (petroleum ether /ethyl acetate = 1:3) to afford a white solid (4.0 g, 79 %).

### 6-(diphenylphosphoryl)benzo[d][1,3]dioxole-5-carbaldehyde (3f)

(6-(1,3-dioxolan-2-yl)benzo[d][1,3]dioxol-5-yl)diphenylphosphine oxide (2.0 g, 5.07 mmol) was following the General Procedure D. The residue was purified by column chromatography (petroleum ether /ethyl acetate = 1:2) to provide a white solid **3f** (1.6 g, 90 %), <sup>1</sup>H NMR (400 MHz, CDCl<sub>3</sub>) δ 10.63 (s, 1H), 7.77-7.56 (m, 7H), 7.50 (td, *J* = 7.4, 3.1 Hz, 4H), 6.59 (d, *J* = 13.2

Hz, 1H), 6.11 (s, 2H);  $^{13}\text{C}$  NMR (100 MHz,  $\text{CDCl}_3$ )  $\delta$  189.5 (d,  $J_{\text{C-P}} = 6.1$  Hz), 151.2 (d,  $J_{\text{C-P}} = 17.8$  Hz), 151.0 (d,  $J_{\text{C-P}} = 2.5$  Hz), 136.1 (d,  $J_{\text{C-P}} = 7.1$  Hz), 132.8, 132.4 (d,  $J_{\text{C-P}} = 2.7$  Hz), 131.8 (d,  $J_{\text{C-P}} = 10.0$  Hz), 130.8, 128.9 (d,  $J_{\text{C-P}} = 12.3$  Hz), 113.1 (d,  $J_{\text{C-P}} = 13.7$  Hz), 108.7 (d,  $J_{\text{C-P}} = 11.2$  Hz), 102.6;  $^{31}\text{P}$  NMR (162 MHz,  $\text{CDCl}_3$ )  $\delta$  31.01. **MS (ESI):** found  $[\text{M}+\text{H}]^+$  351.0. Spectral data for this compound is consistent with that previously reported.<sup>[5]</sup>

### 2-(2-bromo-5-fluorophenyl)-1,3-dioxolane (S7b)

2-bromo-5-fluorobenzaldehyde (3.0 g, 14.8 mmol) was following the General Procedure B. The residue was purified by column chromatography (petroleum ether /ethyl acetate = 30:1) to afford a Colorless oily compound (3.4 g, 93 %).

### (2-(1,3-dioxolan-2-yl)-4-fluorophenyl)diphenylphosphine oxide (S8b)

2-(2-bromo-5-fluorophenyl)-1,3-dioxolane (3.4 g, 13.8 mmol) was following the General Procedure C. The residue was purified by column chromatography (petroleum ether /ethyl acetate = 1:4) to afford a white solid (3.2 g, 78 %).

### 2-(diphenylphosphoryl)-5-fluorobenzaldehyde (3g)

(2-(1,3-dioxolan-2-yl)-4-fluorophenyl) diphenylphosphine oxide (1.1 g, 2.99 mmol) was following the General Procedure D. The residue was purified by column chromatography (petroleum ether /ethyl acetate = 1:4) to provide a white solid **3g** (0.86 g, 89 %),  $^1\text{H}$  NMR (400 MHz,  $\text{CDCl}_3$ )  $\delta$  10.73 (d,  $J = 3.1$  Hz, 1 H), 7.88-7.80 (m, 1 H), 7.70-7.58 (m, 6 H), 7.55-7.48 (m, 4 H), 7.26-7.17 (m, 2 H);  $^{13}\text{C}$  NMR (100 MHz,  $\text{CDCl}_3$ )  $\delta$  189.8 (dd,  $J_{\text{C-F}} = 1.0$  Hz,  $J_{\text{C-P}} = 5.2$  Hz), 166.2 (d,  $J_{\text{C-P}} = 2.9$  Hz), 163.7 (d,  $J_{\text{C-P}} = 2.8$  Hz), 142.4 (t,  $J_{\text{C-P}} = 7.2$  Hz), 136.2 (dd,  $J_{\text{C-F}} = 8.0$  Hz,  $J_{\text{C-P}} = 12.4$  Hz), 132.6 (d,  $J_{\text{C-P}} = 2.8$  Hz), 132.5, 131.8 (d,  $J_{\text{C-P}} = 10.0$  Hz), 131.4, 128.9 (d,  $J_{\text{C-P}} = 12.3$  Hz), 119.5 (dd,  $J_{\text{C-F}} = 13.0$  Hz,  $J_{\text{C-P}} = 21.2$  Hz), 115.9 (dd,  $J_{\text{C-F}} = 9.8$  Hz,  $J_{\text{C-P}} = 22.4$  Hz);  $^{31}\text{P}$  NMR (162 MHz,  $\text{CDCl}_3$ )  $\delta$  30.11. **MS (ESI):** found  $[\text{M}+\text{H}]^+$  325.1. Spectral data for this compound is consistent with that previously reported.<sup>[5]</sup>

## 3. Optimization of Reaction Condition

Table S1. Screening of different solvents <sup>[a]</sup>.

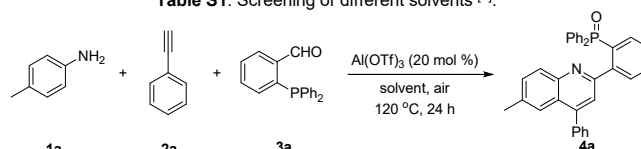

| Entry | solvent           | Yield[%] <sup>b</sup> |
|-------|-------------------|-----------------------|
| 1     | PhMe              | 45                    |
| 2     | xylene            | 47                    |
| 3     | PhCl              | 61                    |
| 4     | 1,4-dioxane       | trace                 |
| 5     | DCE               | 41                    |
| 6     | H <sub>2</sub> O  | trace                 |
| 7     | DMF               | N.R.                  |
| 8     | DMSO              | N.R.                  |
| 9     | <sup>t</sup> BuOH | 34                    |
| 10    | Ethylene glycol   | trace                 |
| 11    | neat              | 48                    |
| 12    | HOAc              | 69                    |

<sup>a</sup> Reaction Conditions: Al(OTf)<sub>3</sub> (0.04 mmol, 20 mol %), **1a** (0.22 mmol), **2a** (0.30 mmol), **3a** (0.20 mmol), solvent (2.0 mL), 120 °C under Air condition for 24 h. <sup>b</sup> Isolated yield.

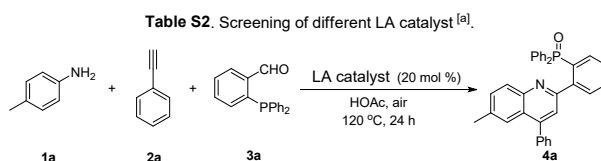

| Entry     | LA catalyst          | yield [%] <sup>b</sup> |
|-----------|----------------------|------------------------|
| 1         | AgOTf                | 55                     |
| 2         | Cu(OTf) <sub>2</sub> | 42                     |
| 3         | Fe(OTf) <sub>2</sub> | 58                     |
| 4         | Mg(OTf) <sub>2</sub> | 52                     |
| 5         | Zn(OTf) <sub>2</sub> | 64                     |
| 6         | Sc(OTf) <sub>2</sub> | 58                     |
| 7         | Dy(OTf) <sub>2</sub> | 56                     |
| 8         | AlCl <sub>3</sub>    | 63                     |
| 9         | FeCl <sub>3</sub>    | 57                     |
| 10        | FeCl <sub>2</sub>    | 55                     |
| <b>11</b> | <b>HOTf</b>          | <b>47</b>              |

<sup>a</sup> Reaction Conditions: LA catalyst (20 mol %), **1a** (0.22 mmol), **2a** (0.30 mmol), **3a** (0.20 mmol), HOAc (2.0 mL), 120 °C under Air condition for 24 h. <sup>b</sup> Isolated yield. <sup>c</sup> 0.40 mmol of **2a** were used.

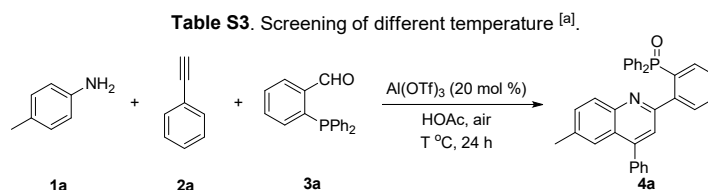

| Entry    | T [°C] <sup>b</sup> | Yield [%] <sup>b</sup> |
|----------|---------------------|------------------------|
| 1        | rt                  | 10                     |
| 2        | 60                  | 46                     |
| 3        | 80                  | 54                     |
| 4        | 100                 | 62                     |
| <b>5</b> | <b>120</b>          | <b>69</b>              |
| 6        | 130                 | 55                     |

<sup>a</sup> Reaction Conditions: Al(OTf)<sub>3</sub> (0.04 mmol, 20 mol %), **1a** (0.22 mmol), **2a** (0.30 mmol), **3a** (0.20 mmol), HOAc (2.0 mL), t °C under Air condition for 24 h. <sup>b</sup> Isolated yield.

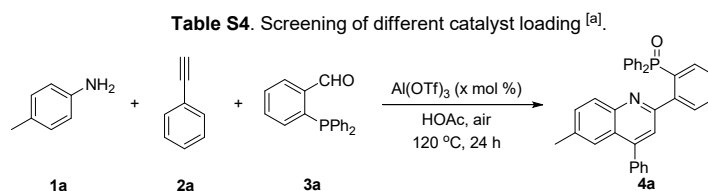



| Entry | Al(OTf) <sub>3</sub> (mol %) | Yield [%] <sup>b</sup> |
|-------|------------------------------|------------------------|
| 1     | 20                           | 69                     |
| 2     | 10                           | 55                     |
| 3     | 5                            | 50                     |
| 4     | 0                            | 34                     |

<sup>a</sup> Reaction Conditions: Al(OTf)<sub>3</sub> (x mol %), **1a** (0.22 mmol), **2a** (0.30 mmol), **3a** (0.20 mmol), HOAc (2.0 mL), 120 °C under Air condition for 24 h. <sup>b</sup> Isolated yield. <sup>c</sup> 0.40 mmol of **2a** were used.

**Table S5.** Screening of different oxidant [<sup>a</sup>].

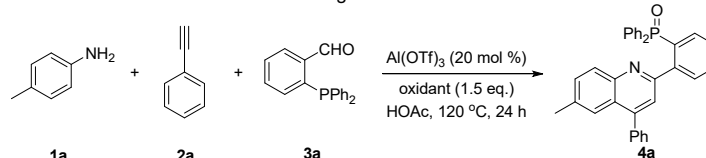

| Entry | Oxidant                                | Yield [%] <sup>b</sup> |
|-------|----------------------------------------|------------------------|
| 1     | Cu(OAc) <sub>2</sub> ·H <sub>2</sub> O | 40                     |
| 2     | AgOAc                                  | 64                     |
| 3     | 1,4-BQ                                 | 48                     |
| 4     | PhI(OAc) <sub>2</sub>                  | 24                     |
| 5     | Ce(SO <sub>4</sub> ) <sub>2</sub>      | 45                     |
| 6     | Mn(OAc) <sub>3</sub>                   | 26                     |

<sup>a</sup> Reaction Conditions: Al(OTf)<sub>3</sub> (0.04 mmol, 20 mol %), **1a** (0.22 mmol), **2a** (0.30 mmol), **3a** (0.20 mmol), HOAc (2.0 mL), oxidant (0.30 mmol), 120 °C under Ar condition for 24 h. <sup>b</sup> Isolated yield.

#### 4. The General Procedures

##### General procedure for reaction:

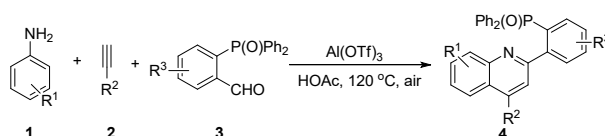

The mixture of amine **1a-1k** (1.1 equiv, 0.22 mmol), alkyne **2a-2l** (1.5 equiv, 0.30 mmol), aldehyde **3a-3h** (1.0 equiv, 0.20 mmol) and aluminium trifluoromethanesulfonate (20 mol % ,0.04 mmol) was dissolved in acetic acid (2 mL). The reaction mixture was stirred at 120 °C in an oil bath for 24 hours under air atmosphere. After the starting material was consumed as indicated by TLC, acetic acid was evaporated concentrated. The crude product was extracted with dichloromethane, washed with saturated Na<sub>2</sub>CO<sub>3</sub>, and the organic solvent was evaporated concentrated in vacuo, purified by silica gel column chromatography (eluent: Petroleum ether: EtOAc = 1:1-1:3) affording the desired product.

##### General procedure for gram-scale reaction:

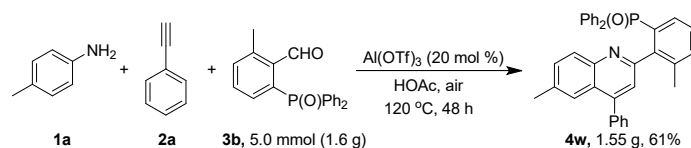

The mixture of amine **1a** (1.1 equiv, 5.5 mmol), alkyne **2a** (1.5 equiv, 7.5 mmol), aldehyde **3b** or

**3d** (1.0 equiv, 5.0 mmol) and aluminium trifluoromethanesulfonate (20 mol % ,1.0 mmol) was dissolved in acetic acid (50 mL) in a 100 mL flask. The reaction mixture was stirred at 120 °C in an oil bath for 24 hours under air atmosphere. After the starting material was consumed as indicated by TLC, acetic acid was evaporated concentrated. The crude product was extracted with dichloromethane, washed with saturated Na<sub>2</sub>CO<sub>3</sub>, and the organic solvent was evaporated concentrated in vacuo, purified by silica gel column chromatography (DCM: EtOAc = 10:1-2:1) affording the desired product.

**General procedure for reduction 4 to 5:**

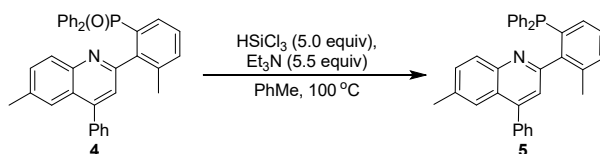

In a 25 mL of reaction tube under Ar atmosphere, **4** (1.0 equiv, 0.6 mmol) was added to dry toluene (6 mL), trichlorosilane (5.0 equiv, 3.0 mmol) was added dropwise, then triethylamine (3.3 mmol, 5.5 equiv) was added dropwise to the solution and refluxed at 100 °C overnight, after which the reaction mixture was cooled, carefully quenching the reaction with saturated aqueous NaHCO<sub>3</sub> solution, and then extracting the solution three times with DCM. The organic phase are combined, and removed solvent, and then the flash column chromatography (eluent: Petroleum ether : EtOAc = 20:1-5:1) method is used to obtain the phosphorus-containing quinoline compound **5**.

**5. Mechanism explaining the regioselectivity**

As show in the following figure, a tentative mechanism was proposed. Initially, Intermediate B was formed by coordination of imine A, which was generated in situ, and alkyne to Al<sup>(III)</sup>, and then addition of alkyne to imine A forms the propargylamine intermediate C, which then undergoes an intramolecular hydroarylation of alkyne to give dihydroquinoline intermediate D. Subsequently, a oxidation of D by O<sub>2</sub> in air affords the quinoline product 4a.

For unsymmetrical aniline derivatives as substrate, the regioselectivity of the reaction mainly depends on the electronic and steric effects of the ortho position of amino on the propargylamine intermediate C. The greater the steric hindrance effect of the ortho position of amino on the propargylamine intermediate C, the worse the regioselectivity, and the higher the electron cloud density of the ortho position of amino on the propargylamine intermediate C, the better the regioselectivity.

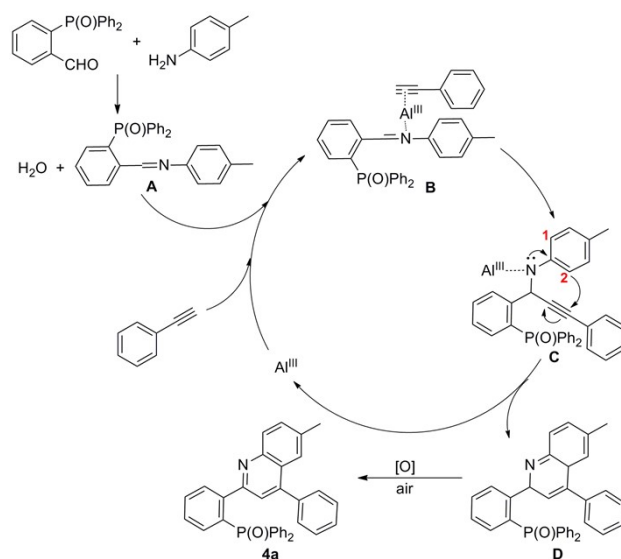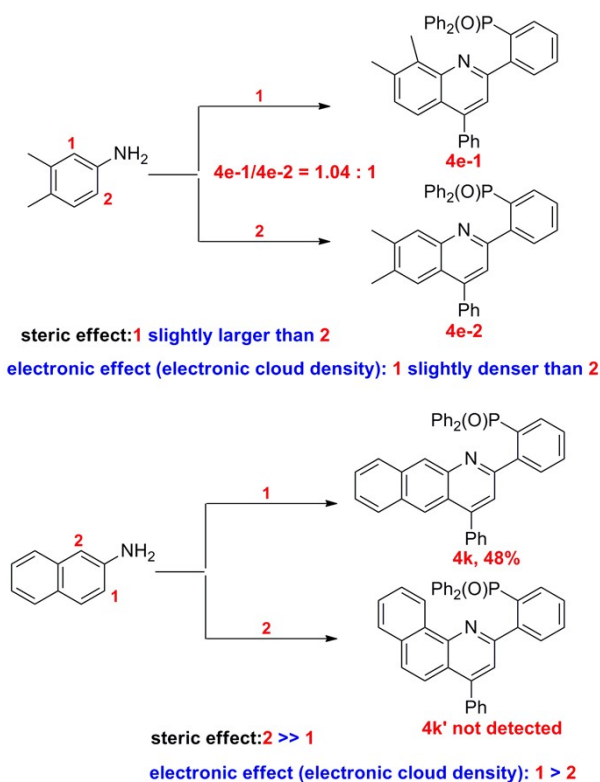

**Scheme S1** Mechanism explaining the regioselectivity

## 6. Characterization of product

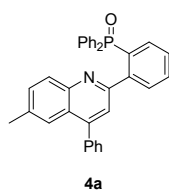

**4a**, Light yellow solid, 69 % yield,  $^1\text{H NMR}$  (400 MHz,  $\text{CDCl}_3$ )  $\delta$  7.77-7.44 (m, 16H), 7.40 (dd,  $J = 8.6, 1.8$  Hz, 1H), 7.28-7.15 (m, 6 H), 2.42 (s, 3H);  $^{13}\text{C NMR}$  (100 MHz,  $\text{CDCl}_3$ )  $\delta$  157.0 (d,  $J_{\text{C-P}} = 3.8$  Hz), 146.5 (d,  $J_{\text{C-P}} = 41.8$  Hz), 145.8 (d,  $J_{\text{C-P}} = 8.1$  Hz), 138.1, 136.3, 134.7 (d,  $J_{\text{C-P}} =$

10.9 Hz), 133.2 (d,  $J_{C-P} = 105.1$  Hz), 132.3, 132.0 (d,  $J_{C-P} = 2.4$  Hz), 131.7 (d,  $J_{C-P} = 9.7$  Hz), 131.3, 131.3, 131.0, 130.9 (d,  $J_{C-P} = 2.5$  Hz), 129.6, 129.2, 128.4, 128.1, 127.9 (d,  $J_{C-P} = 11.9$  Hz), 127.7 (d,  $J_{C-P} = 12.2$  Hz), 124.9, 124.0, 123.0, 21.8;  $^{31}\text{P NMR}$  (162 MHz,  $\text{CDCl}_3$ )  $\delta$  29.79; **HRMS (ESI, m/z)**: calculated for  $\text{C}_{34}\text{H}_{27}\text{NOP}^+$ : 496.1825, found :496.1827  $[\text{M}+\text{H}]^+$ .

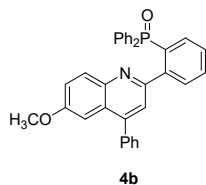

**4b**, Light yellow solid, 63 % yield,  $^1\text{H NMR}$  (400 MHz,  $\text{CDCl}_3$ )  $\delta$  7.74-7.42 (m, 15H), 7.28-7.16 (m, 7H), 7.10 (d,  $J=2.8$  Hz, 1H), 3.77 (s, 3H);  $^{13}\text{C NMR}$  (100 MHz,  $\text{CDCl}_3$ )  $\delta$  157.8, 155.5 (d,  $J_{C-P} = 3.8$  Hz), 146.0, 145.8 (d,  $J_{C-P} = 8.1$  Hz), 143.8, 138.1, 134.6 (d,  $J_{C-P} = 10.9$  Hz), 133.2 (d,  $J_{C-P} = 105.0$  Hz), 132.3, 132.0 (d,  $J_{C-P} = 2.5$  Hz), 131.6 (d,  $J_{C-P} = 9.6$  Hz), 131.3, 130.9 (d,  $J_{C-P} = 3.0$  Hz), 130.8 (d,  $J_{C-P} = 2.6$  Hz), 128.9 (d,  $J_{C-P} = 79.1$  Hz), 128.2, 127.8 (d,  $J_{C-P} = 12.1$  Hz), 127.7 (d,  $J_{C-P} = 12.2$  Hz), 127.7 (d,  $J_{C-P} = 3.0$  Hz), 125.9, 123.3, 121.4, 103.2, 55.3;  $^{31}\text{P NMR}$  (162 MHz,  $\text{CDCl}_3$ )  $\delta$  29.72; **HRMS (ESI, m/z)**: calculated for  $\text{C}_{34}\text{H}_{27}\text{NO}_2\text{P}^+$ : 512.1774, found: 512.1775  $[\text{M}+\text{H}]^+$ .

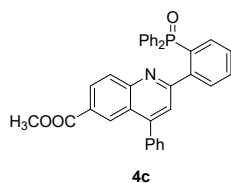

**4c**, Light yellow solid, 47 % yield,  $^1\text{H NMR}$  (400 MHz,  $\text{CDCl}_3$ )  $\delta$  8.59 (d,  $J = 1.7$  Hz, 1H), 8.18 (dd,  $J = 8.8, 1.9$  Hz, 1H), 7.75-7.59 (m, 9H), 7.57-7.47 (m, 6H), 7.27-7.16 (m, 6H), 3.92 (s, 3H);  $^{13}\text{C NMR}$  (100 MHz,  $\text{CDCl}_3$ )  $\delta$  166.8, 160.1 (d,  $J_{C-P} = 3.9$  Hz), 149.3 (d,  $J_{C-P} = 81.3$  Hz), 145.3 (d,  $J_{C-P} = 7.7$  Hz), 137.2, 134.7 (d,  $J_{C-P} = 11.0$  Hz), 133.6, 132.5, 132.5, 132.1 (d,  $J_{C-P} = 2.4$  Hz), 131.7 (d,  $J_{C-P} = 9.6$  Hz), 131.5, 131.1 (d,  $J_{C-P} = 2.7$  Hz), 130.9 (d,  $J_{C-P} = 9.2$  Hz), 129.8, 129.7, 128.8, 128.7 (d,  $J_{C-P} = 0.8$  Hz), 128.6, 128.3 (d,  $J_{C-P} = 12.1$  Hz), 127.9, 127.8, 124.3, 123.9, 52.3;  $^{31}\text{P NMR}$  (162 MHz,  $\text{CDCl}_3$ )  $\delta$  29.53; **HRMS (ESI, m/z)**: calculated for  $\text{C}_{35}\text{H}_{27}\text{NO}_3\text{P}^+$ : 540.1723, found: 540.1722  $[\text{M}+\text{H}]^+$ .

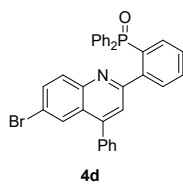

**4d**, Light yellow solid, 61 % yield,  $^1\text{H NMR}$  (400 MHz,  $\text{CDCl}_3$ )  $\delta$  7.96 (d,  $J = 2.1$  Hz, 1H), 7.76-7.57 (m, 9H), 7.57-7.44 (m, 7H), 7.32-7.18 (m, 6H);  $^{13}\text{C NMR}$  (100 MHz,  $\text{CDCl}_3$ )  $\delta$  158.3 (d,  $J_{C-P} = 3.8$  Hz), 146.6, 146.3, 145.3 (d,  $J_{C-P} = 7.8$  Hz), 137.1, 134.7 (d,  $J_{C-P} = 11.0$  Hz), 133.6, 132.5, 132.5, 132.0 (d,  $J_{C-P} = 2.4$  Hz), 132.4, 131.6 (d,  $J_{C-P} = 9.6$  Hz), 131.4, 131.2, 131.0 (d,  $J_{C-P} = 2.6$  Hz), 130.8 (d,  $J_{C-P} = 9.3$  Hz), 129.1 (d,  $J_{C-P} = 79.2$  Hz), 128.6, 128.2 (d,  $J_{C-P} = 12.1$  Hz), 127.8 (d,  $J_{C-P} = 12.2$  Hz), 127.5, 126.2, 123.7, 120.5;  $^{31}\text{P NMR}$  (162 MHz,  $\text{CDCl}_3$ )  $\delta$  29.62; **HRMS (ESI, m/z)**: calculated for  $\text{C}_{33}\text{H}_{23}\text{BrNOPNa}^+$ : 582.0593, found: 582.0591  $[\text{M}+\text{Na}]^+$ .

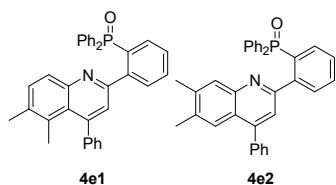

**4e1, 4e2**, Light yellow solid, 67 % yield (1:1.04),  $^1\text{H NMR}$  (400 MHz,  $\text{CDCl}_3$ )  $\delta$  7.77-7.57 (m, 14H), 7.55-7.34 (m, 16H), 7.31-7.14 (m, 14H), 2.39 (s, 3H), 2.35 (s, 3H), 2.33 (s, 3H), 1.82 (s, 3H);  $^{13}\text{C NMR}$  (100 MHz,  $\text{CDCl}_3$ )  $\delta$  156.8 (d,  $J_{\text{C-P}} = 3.7$  Hz), 155.7 (d,  $J_{\text{C-P}} = 3.8$  Hz), 147.6, 147.2, 146.9, 146.5, 146.0 (d,  $J_{\text{C-P}} = 8.0$  Hz), 145.4 (d,  $J_{\text{C-P}} = 8.1$  Hz), 142.8, 139.2, 138.2, 136.3, 135.9, 134.7 (d,  $J_{\text{C-P}} = 10.9$  Hz), 133.8 (d,  $J_{\text{C-P}} = 7.5$  Hz), 132.8 (d,  $J_{\text{C-P}} = 7.4$  Hz), 132.3 (d,  $J_{\text{C-P}} = 4.4$  Hz), 132.0, 132.0, 131.9 (d,  $J_{\text{C-P}} = 7.1$  Hz), 131.9 (d,  $J_{\text{C-P}} = 2.0$  Hz), 131.7 (d,  $J_{\text{C-P}} = 3.7$  Hz), 131.6 (d,  $J_{\text{C-P}} = 3.8$  Hz), 131.3 (d,  $J_{\text{C-P}} = 4.6$  Hz), 130.9, 130.8, 130.8, 130.8, 130.8, 130.7, 129.5, 128.9, 128.5 (d,  $J_{\text{C-P}} = 17.9$  Hz), 128.1, 128.0, 128.0, 127.9, 127.7 (d,  $J_{\text{C-P}} = 1.6$  Hz), 127.6 (d,  $J_{\text{C-P}} = 1.5$  Hz), 127.4, 127.2, 125.2, 125.0, 124.4, 123.5, 122.1, 21.0, 20.2, 20.2, 20.2;  $^{31}\text{P NMR}$  (162 MHz,  $\text{CDCl}_3$ )  $\delta$  29.90, 29.77; **HRMS (ESI, m/z)**: calculated for  $\text{C}_{35}\text{H}_{28}\text{NOPNa}^+$ : 532.1801, found: 532.1802  $[\text{M}+\text{Na}]^+$ .

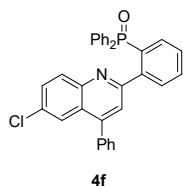

**4f**, Light yellow solid, 63 % yield,  $^1\text{H NMR}$  (400 MHz,  $\text{CDCl}_3$ )  $\delta$  7.79 (d,  $J = 2.2$  Hz, 1H), 7.73-7.57 (m, 9H), 7.56-7.45 (m, 7H), 7.31-7.17 (m, 6H);  $^{13}\text{C NMR}$  (100 MHz,  $\text{CDCl}_3$ )  $\delta$  158.2 (d,  $J_{\text{C-P}} = 3.9$  Hz), 146.7, 146.1, 145.4 (d,  $J_{\text{C-P}} = 7.8$  Hz), 137.2, 134.7 (d,  $J_{\text{C-P}} = 11.0$  Hz), 133.6, 132.5, 132.4, 132.3, 132.1 (d,  $J_{\text{C-P}} = 2.3$  Hz), 131.6 (d,  $J_{\text{C-P}} = 9.6$  Hz), 131.4, 131.1, 131.0 (d,  $J_{\text{C-P}} = 2.6$  Hz), 130.8 (d,  $J_{\text{C-P}} = 9.3$  Hz), 130.0, 129.1 (d,  $J_{\text{C-P}} = 79.3$  Hz), 128.6, 128.2 (d,  $J_{\text{C-P}} = 12.0$  Hz), 127.8 (d,  $J_{\text{C-P}} = 12.1$  Hz), 125.7, 124.2, 123.8;  $^{31}\text{P NMR}$  (162 MHz,  $\text{CDCl}_3$ )  $\delta$  29.62; **HRMS (ESI, m/z)**: calculated for  $\text{C}_{33}\text{H}_{23}\text{ClNOPNa}^+$ : 538.1098, found: 538.1099  $[\text{M}+\text{Na}]^+$ .

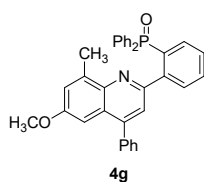

**4g**, Light yellow solid, 44 % yield,  $^1\text{H NMR}$  (400 MHz,  $\text{CDCl}_3$ )  $\delta$  7.80 (dd,  $J = 13.6, 7.7$  Hz, 1H), 7.68-7.62 (m, 2H), 7.62-7.54 (m, 4H), 7.53-7.41 (m, 6H), 7.37 (s, 1H), 7.26-7.09 (m, 7H), 6.91 (d,  $J = 2.7$  Hz, 1H), 3.74 (s, 3H), 2.51 (s, 3H);  $^{13}\text{C NMR}$  (100 MHz,  $\text{CDCl}_3$ )  $\delta$  157.2, 154.7 (d,  $J_{\text{C-P}} = 3.8$  Hz), 146.3 (d,  $J_{\text{C-P}} = 8.7$  Hz), 146.1, 143.3, 139.6, 138.6, 134.6 (d,  $J_{\text{C-P}} = 10.6$  Hz), 133.7, 132.7, 131.9 (d,  $J_{\text{C-P}} = 2.5$  Hz), 131.6 (d,  $J_{\text{C-P}} = 9.7$  Hz), 131.1 (d,  $J_{\text{C-P}} = 9.6$  Hz), 131.1, 130.7 (d,  $J_{\text{C-P}} = 2.7$  Hz), 129.4, 128.5, 128.0, 127.7 (d,  $J_{\text{C-P}} = 11.8$  Hz), 127.7 (d,  $J_{\text{C-P}} = 12.1$  Hz), 126.0, 123.4, 121.4, 55.2, 18.5;  $^{31}\text{P NMR}$  (162 MHz,  $\text{CDCl}_3$ )  $\delta$  29.34; **HRMS (ESI, m/z)**: calculated for  $\text{C}_{35}\text{H}_{29}\text{NO}_2\text{P}^+$ : 526.1930, found: 526.1930  $[\text{M}+\text{H}]^+$ .

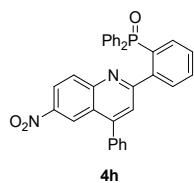

**4h**, yellow solid, 25 % yield,  $^1\text{H NMR}$  (400 MHz,  $\text{CDCl}_3$ )  $\delta$  7.82 (d,  $J = 7.8$  Hz, 1H), 7.76-7.55 (m, 10H), 7.53-7.37 (m, 7H), 7.25-7.15 (m, 5H);  $^{13}\text{C NMR}$  (100 MHz,  $\text{CDCl}_3$ )  $\delta$  157.9 (d,  $J_{\text{C-P}} = 4.2$  Hz), 147.6 (d,  $J_{\text{C-P}} = 29.4$  Hz), 137.8, 134.7 (d,  $J_{\text{C-P}} = 11.0$  Hz), 133.6, 132.5, 132.1 (d,  $J_{\text{C-P}} = 2.5$  Hz), 131.9 (d,  $J_{\text{C-P}} = 100.9$  Hz), 131.7 (d,  $J_{\text{C-P}} = 9.6$  Hz), 131.4, 130.9, 130.9, 130.8, 129.7, 129.3 (d,  $J_{\text{C-P}} = 43.4$  Hz), 128.5, 128.3, 128.1 (d,  $J_{\text{C-P}} = 11.9$  Hz), 127.7 (d,  $J_{\text{C-P}} = 12.2$  Hz), 126.4, 125.4, 125.0, 123.1;  $^{31}\text{P NMR}$  (162 MHz,  $\text{CDCl}_3$ )  $\delta$  29.69; **HRMS (ESI, m/z)**: calculated for  $\text{C}_{33}\text{H}_{24}\text{N}_2\text{O}_3\text{P}^+$ : 527.1519, found: 527.1516  $[\text{M}+\text{H}]^+$ .

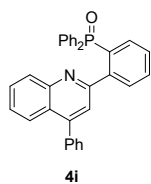

**4i**, Light yellow solid, 12 % yield,  $^1\text{H NMR}$  (400 MHz,  $\text{CDCl}_3$ )  $\delta$  8.81 (d,  $J = 2.5$  Hz, 1H), 8.35 (dd,  $J = 9.2, 2.5$  Hz, 1H), 7.86 (s, 1H), 7.78-7.41 (m, 16H), 7.36-7.28 (m, 2H), 7.27-7.20 (m, 3H);  $^{13}\text{C NMR}$  (100 MHz,  $\text{CDCl}_3$ )  $\delta$  161.5 (d,  $J_{\text{C-P}} = 3.8$  Hz), 149.7 (d,  $J_{\text{C-P}} = 23.0$  Hz), 145.4, 144.9 (d,  $J_{\text{C-P}} = 7.5$  Hz), 136.4, 134.8 (d,  $J_{\text{C-P}} = 11.3$  Hz), 133.5, 132.6, 132.5, 132.2 (d,  $J_{\text{C-P}} = 2.4$  Hz), 131.6 (d,  $J_{\text{C-P}} = 9.6$  Hz), 131.2, 131.2, 130.9 (d,  $J_{\text{C-P}} = 9.2$  Hz), 129.3 (d,  $J_{\text{C-P}} = 55.1$  Hz), 129.2, 128.7, 128.6 (d,  $J_{\text{C-P}} = 12.1$  Hz), 128.4, 128.0 (d,  $J_{\text{C-P}} = 12.2$  Hz), 124.7, 124.1, 122.6 (d,  $J_{\text{C-P}} = 18.7$  Hz);  $^{31}\text{P NMR}$  (162 MHz,  $\text{CDCl}_3$ )  $\delta$  29.74; **HRMS (ESI, m/z)**: calculated for  $\text{C}_{33}\text{H}_{25}\text{NOPH}^+$ : 482.1668, found: 482.1666  $[\text{M}+\text{H}]^+$ .

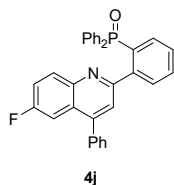

**4j**, Light yellow solid, 67 % yield,  $^1\text{H NMR}$  (400 MHz,  $\text{CDCl}_3$ )  $\delta$  7.74-7.56 (m, 9H), 7.55-7.41 (m, 7H), 7.39-7.32 (td,  $J = 9.0, 2.8$  Hz, 1H), 7.31-7.18 (m, 6H);  $^{13}\text{C NMR}$  (100 MHz,  $\text{CDCl}_3$ )  $\delta$  161.9, 159.4, 157.4 (t,  $J_{\text{C-P}} = 3.3$  Hz), 147.0 (d,  $J_{\text{C-P}} = 5.5$  Hz), 145.5 (d,  $J_{\text{C-P}} = 8.0$  Hz), 144.8, 137.4, 134.7 (d,  $J_{\text{C-P}} = 11.0$  Hz), 133.2 (d,  $J_{\text{C-F}} = 104.9$  Hz), 132.1 (d,  $J_{\text{C-P}} = 2.5$  Hz), 132.0 (d,  $J_{\text{C-P}} = 9.1$  Hz), 131.9 (d,  $J_{\text{C-P}} = 100.7$  Hz), 131.7 (d,  $J_{\text{C-P}} = 9.6$  Hz), 131.0 (d,  $J_{\text{C-P}} = 2.8$  Hz), 130.9 (d,  $J_{\text{C-P}} = 9.4$  Hz), 129.1 (d,  $J_{\text{C-F}} = 73.3$  Hz), 128.5, 128.1 (d,  $J_{\text{C-F}} = 12.0$  Hz), 127.8 (d,  $J_{\text{C-F}} = 12.1$  Hz), 125.9 (d,  $J_{\text{C-P}} = 9.6$  Hz), 123.6, 119.3 (d,  $J_{\text{C-F}} = 25.5$  Hz), 108.8 (d,  $J_{\text{C-P}} = 23.0$  Hz);  $^{31}\text{P NMR}$  (162 MHz,  $\text{CDCl}_3$ )  $\delta$  29.59;  $^{19}\text{F NMR}$  (376 MHz,  $\text{CDCl}_3$ )  $\delta$  -112.66. **HRMS (ESI, m/z)**: calculated for  $\text{C}_{33}\text{H}_{23}\text{FNOPNa}^+$ : 522.1394, found: 522.1395  $[\text{M}+\text{Na}]^+$ .

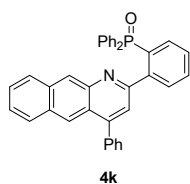

**4k**, Light yellow solid, 48 % yield,  $^1\text{H NMR}$  (400 MHz,  $\text{CDCl}_3$ )  $\delta$  7.89-7.76 (m, 3H), 7.75-7.57 (m, 8H), 7.55 (d,  $J = 9.0$  Hz, 1H), 7.52-7.37 (m, 7H), 7.23-7.04 (m, 7H);  $^{13}\text{C NMR}$  (100 MHz,  $\text{CDCl}_3$ )  $\delta$  156.4 (d,  $J_{\text{C-P}} = 3.8$  Hz), 148.6, 147.4, 145.2 (d,  $J_{\text{C-P}} = 8.1$  Hz), 142.2, 134.7 (d,  $J_{\text{C-P}} = 11.0$  Hz), 133.6, 132.8, 132.6, 132.5, 132.1 (d,  $J_{\text{C-P}} = 2.3$  Hz), 131.7, 131.6, 131.5, 131.1, 131.0 (d,  $J_{\text{C-P}} = 9.4$  Hz), 130.9 (d,  $J_{\text{C-P}} = 2.8$  Hz), 129.4, 129.1, 128.4, 128.2 (d,  $J_{\text{C-P}} = 12.5$  Hz), 128.1 (d,  $J_{\text{C-P}} = 12.6$  Hz), 127.8 (d,  $J_{\text{C-P}} = 12.2$  Hz), 126.4, 125.7, 125.2, 122.3;  $^{31}\text{P NMR}$  (162 MHz,  $\text{CDCl}_3$ )  $\delta$  29.67; **HRMS (ESI, m/z)**: calculated for  $\text{C}_{37}\text{H}_{26}\text{NOPNa}^+$ : 554.1644, found: 554.1646  $[\text{M}+\text{Na}]^+$ .

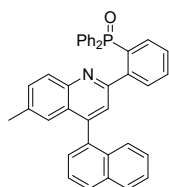

**4l**

**4l**, Light yellow solid, 69 % yield,  $^1\text{H NMR}$  (400 MHz,  $\text{CDCl}_3$ )  $\delta$  7.93 (t,  $J = 9.2$  Hz, 2H), 7.81 (dd,  $J = 13.7, 7.7$  Hz, 1H), 7.76-7.69 (m, 3H), 7.67-7.44 (m, 8H), 7.42-7.26 (m, 7H), 7.23-7.15 (m, 3H), 7.01 (s, 1H), 2.24 (s, 3H);  $^{13}\text{C NMR}$  (100 MHz,  $\text{CDCl}_3$ )  $\delta$  156.8 (d,  $J_{\text{C-P}} = 3.4$  Hz), 145.9 (d,  $J_{\text{C-P}} = 38.3$  Hz), 145.5 (d,  $J_{\text{C-P}} = 7.6$  Hz), 136.0 (d,  $J_{\text{C-P}} = 53.9$  Hz), 135.1 (d,  $J_{\text{C-P}} = 10.8$  Hz), 134.2 (d,  $J_{\text{C-P}} = 3.5$  Hz), 133.3, 133.2 (d,  $J_{\text{C-P}} = 3.8$  Hz), 132.1, 131.9, 131.9, 131.8 (d,  $J_{\text{C-P}} = 12.7$  Hz), 131.7, 131.6 (d,  $J_{\text{C-P}} = 5.8$  Hz), 131.1, 131.0, 131.0 (d,  $J_{\text{C-P}} = 2.6$  Hz), 130.7 (d,  $J_{\text{C-P}} = 2.6$  Hz), 128.8 (d,  $J_{\text{C-P}} = 58.8$  Hz), 128.1, 128.0, 127.9, 127.7 (d,  $J_{\text{C-P}} = 6.0$  Hz), 127.4 (d,  $J_{\text{C-P}} = 30.6$  Hz), 126.3, 126.1 (d,  $J_{\text{C-P}} = 10.3$  Hz), 125.6 (d,  $J_{\text{C-P}} = 69.4$  Hz), 124.5, 123.3, 21.6;  $^{31}\text{P NMR}$  (162 MHz,  $\text{CDCl}_3$ )  $\delta$  30.53; **HRMS (ESI, m/z)**: calculated for  $\text{C}_{38}\text{H}_{29}\text{NOP}^+$ : 546.1981, found: 546.1918  $[\text{M}+\text{H}]^+$ .

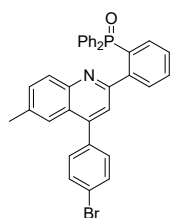

**4m**

**4m**, Light yellow solid, 64 % yield,  $^1\text{H NMR}$  (400 MHz,  $\text{CDCl}_3$ )  $\delta$  7.73-7.57 (m, 11H), 7.51-7.38 (m, 5H), 7.27-7.15 (m, 6H), 2.44 (s, 3H);  $^{13}\text{C NMR}$  (100 MHz,  $\text{CDCl}_3$ )  $\delta$  156.9 (d,  $J_{\text{C-P}} = 3.8$  Hz), 145.8 (d,  $J_{\text{C-P}} = 100.1$  Hz), 145.7 (d,  $J_{\text{C-P}} = 8.0$  Hz), 136.9, 136.5, 134.6 (d,  $J_{\text{C-P}} = 11.1$  Hz), 133.0 (d,  $J_{\text{C-P}} = 104.8$  Hz), 132.2, 132.1 (d,  $J_{\text{C-P}} = 2.4$  Hz), 131.6, 131.6, 131.5, 131.4, 131.2, 130.9 (d,  $J_{\text{C-P}} = 9.2$  Hz), 130.9 (d,  $J_{\text{C-P}} = 2.6$  Hz), 129.3, 128.0 (d,  $J_{\text{C-P}} = 12.0$  Hz), 127.7 (d,  $J_{\text{C-P}} = 12.1$  Hz), 124.6, 123.6, 123.1, 122.5, 21.8;  $^{31}\text{P NMR}$  (162 MHz,  $\text{CDCl}_3$ )  $\delta$  29.74; **HRMS (ESI, m/z)**: calculated for  $\text{C}_{34}\text{H}_{25}\text{BrNOPNa}^+$ : 596.0749, found: 596.0750  $[\text{M}+\text{Na}]^+$ .

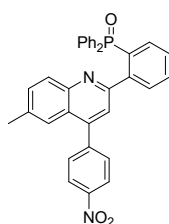

**4n**

**4n**, Light yellow solid, 42 % yield,  $^1\text{H NMR}$  (400 MHz,  $\text{CDCl}_3$ )  $\delta$  8.51-8.28 (m, 2H), 7.84-7.37 (m, 15H), 7.31-7.20 (m, 5H), 2.46 (s, 3H);  $^{13}\text{C NMR}$  (100 MHz,  $\text{CDCl}_3$ )  $\delta$  156.9 (d,  $J_{\text{C-P}} = 4.0$  Hz), 147.6, 146.4, 145.5 (d,  $J_{\text{C-P}} = 8.0$  Hz), 144.3 (d,  $J_{\text{C-P}} = 97.8$  Hz), 137.1, 134.5 (d,  $J_{\text{C-P}} = 11.4$  Hz), 133.3, 132.2 (d,  $J_{\text{C-P}} = 4.3$  Hz), 132.2 (d,  $J_{\text{C-P}} = 2.3$  Hz), 131.7, 131.5 (d,  $J_{\text{C-P}} = 9.6$  Hz), 131.2, 131.1, 131.1, 131.0, 130.6, 129.5, 128.1 (d,  $J_{\text{C-P}} = 12.1$  Hz), 127.8 (d,  $J_{\text{C-P}} = 12.1$  Hz), 124.1, 123.7, 123.3 (d,  $J_{\text{C-P}} = 31.3$  Hz), 21.8;  $^{31}\text{P NMR}$  (162 MHz,  $\text{CDCl}_3$ )  $\delta$  29.75; **HRMS (ESI, m/z)**: calculated for  $\text{C}_{34}\text{H}_{26}\text{N}_2\text{O}_3\text{P}^+$ : 541.1676, found: 541.1674  $[\text{M}+\text{H}]^+$ .

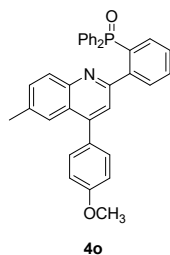

**4o**, Light yellow solid, 65 % yield,  $^1\text{H NMR}$  (400 MHz,  $\text{CDCl}_3$ )  $\delta$  7.75-7.53 (m, 10H), 7.51-7.44 (m, 3H), 7.40 (dd,  $J = 8.6, 1.7$  Hz, 1H), 7.26-7.14 (m, 6H), 7.05 (d,  $J = 8.7$  Hz, 2H), 3.89 (s, 3H), 2.43 (s, 3H);  $^{13}\text{C NMR}$  (100 MHz,  $\text{CDCl}_3$ )  $\delta$  159.6, 156.9 (d,  $J_{\text{C-P}} = 4.0$  Hz), 146.4 (d,  $J_{\text{C-P}} = 2.8$  Hz), 145.9 (d,  $J_{\text{C-P}} = 8.2$  Hz), 136.1, 134.6 (d,  $J_{\text{C-P}} = 10.9$  Hz), 133.1 (d,  $J_{\text{C-P}} = 105.1$  Hz), 132.3, 132.3, 132.0 (d,  $J_{\text{C-P}} = 2.3$  Hz), 131.6 (d,  $J_{\text{C-P}} = 9.6$  Hz), 131.3, 131.2, 130.9, 130.9, 130.8 (d,  $J_{\text{C-P}} = 2.9$  Hz), 130.3, 129.2, 127.9 (d,  $J_{\text{C-P}} = 12.0$  Hz), 127.7 (d,  $J_{\text{C-P}} = 12.1$  Hz), 125.1, 123.5 (d,  $J_{\text{C-P}} = 110.9$  Hz), 113.9, 55.3, 21.8;  $^{31}\text{P NMR}$  (162 MHz,  $\text{CDCl}_3$ )  $\delta$  29.73; **HRMS (ESI, m/z)**: calculated for  $\text{C}_{35}\text{H}_{29}\text{NO}_2\text{P}^+$ : 526.1930, found: 526.1930  $[\text{M}+\text{H}]^+$ .

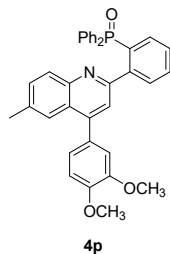

**4p**, Light yellow solid, 50 % yield,  $^1\text{H NMR}$  (400 MHz,  $\text{CDCl}_3$ )  $\delta$  7.74-7.53 (m, 10H), 7.51-7.45 (m, 1H), 7.41 (dd,  $J = 8.6, 1.7$  Hz, 1H), 7.27-7.15 (m, 6H), 7.12-7.00 (m, 3H), 3.98 (s, 3H), 3.96 (s, 3H), 2.44 (s, 3H);  $^{13}\text{C NMR}$  (100 MHz,  $\text{CDCl}_3$ )  $\delta$  157.0 (d,  $J_{\text{C-P}} = 3.9$  Hz), 148.9 (d,  $J_{\text{C-P}} = 25.1$  Hz), 146.5 (d,  $J_{\text{C-P}} = 11.8$  Hz), 145.8 (d,  $J_{\text{C-P}} = 8.1$  Hz), 136.1, 134.7 (d,  $J_{\text{C-P}} = 10.9$  Hz), 133.2 (d,  $J_{\text{C-P}} = 105.0$  Hz), 132.3, 132.0 (d,  $J_{\text{C-P}} = 2.3$  Hz), 131.6 (d,  $J_{\text{C-P}} = 9.7$  Hz), 131.3, 131.2, 130.9, 130.8, 130.8, 130.6, 129.2, 127.9 (d,  $J_{\text{C-P}} = 11.9$  Hz), 127.7 (d,  $J_{\text{C-P}} = 12.1$  Hz), 125.1, 124.1, 122.9, 122.2, 112.9, 111.0, 56.0, 55.9, 21.8;  $^{31}\text{P NMR}$  (162 MHz,  $\text{CDCl}_3$ )  $\delta$  29.71; **HRMS (ESI, m/z)**: calculated for  $\text{C}_{36}\text{H}_{31}\text{NO}_3\text{P}^+$ : 556.2036, found: 556.2037  $[\text{M}+\text{H}]^+$ .

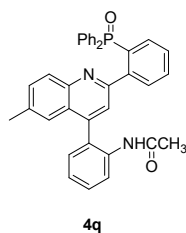

**4q**, Light yellow solid, 58 % yield,  $^1\text{H NMR}$  (400 MHz,  $\text{CDCl}_3$ )  $\delta$  8.98 (s, 1H), 8.23 (d,



$J=8.3$  Hz, 1H), 7.75 (dd,  $J = 7.2, 3.3$  Hz, 1H), 7.71-7.64 (m, 3H), 7.61 (d,  $J = 8.6$  Hz, 1H), 7.54-7.22 (m, 14H), 7.21-7.13 (m, 2H), 2.40 (s, 3H), 2.07 (s, 3H);  $^{13}\text{C}$  NMR (100 MHz,  $\text{CDCl}_3$ )  $\delta$  170.3, 156.5 (d,  $J_{\text{C-P}} = 4.1$  Hz), 146.6 (d,  $J_{\text{C-P}} = 7.3$  Hz), 146.1, 142.3, 136.5 (d,  $J_{\text{C-P}} = 49.3$  Hz), 133.4 (d,  $J_{\text{C-P}} = 2.2$  Hz), 133.3, 132.6 (d,  $J_{\text{C-P}} = 41.2$  Hz), 132.2 (d,  $J_{\text{C-P}} = 2.4$  Hz), 131.9, 131.8, 131.7, 131.6, 131.5 (d,  $J_{\text{C-P}} = 2.8$  Hz), 131.3 (d,  $J_{\text{C-P}} = 10.0$  Hz), 130.9 (d,  $J_{\text{C-P}} = 9.4$  Hz), 130.0, 129.1, 128.9 (d,  $J_{\text{C-P}} = 46.1$  Hz), 128.5 (d,  $J_{\text{C-P}} = 12.0$  Hz), 128.1 (d,  $J_{\text{C-P}} = 12.3$  Hz), 127.6 (d,  $J_{\text{C-P}} = 12.5$  Hz), 125.9, 124.9 (d,  $J_{\text{C-P}} = 93.8$  Hz), 123.9 (d,  $J_{\text{C-P}} = 49.3$  Hz), 24.0, 21.6;  $^{31}\text{P}$  NMR (162 MHz,  $\text{CDCl}_3$ )  $\delta$  30.87; **HRMS (ESI, m/z)**: calculated for  $\text{C}_{36}\text{H}_{29}\text{N}_2\text{O}_2\text{PNa}^+$ : 575.1859, found: 575.1860  $[\text{M}+\text{Na}]^+$ .

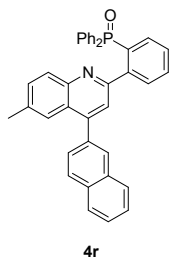

**4r**, Light yellow solid, 69 % yield,  $^1\text{H}$  NMR (400 MHz,  $\text{CDCl}_3$ )  $\delta$  7.98 (d,  $J = 8.4$  Hz, 1H), 7.95-7.89 (m, 3H), 7.81-7.69 (m, 2H), 7.69-7.39 (m, 13H), 7.30-7.17 (m, 6H), 2.40 (s, 3H);  $^{13}\text{C}$  NMR (100 MHz,  $\text{CDCl}_3$ )  $\delta$  157.0 (d,  $J_{\text{C-P}} = 3.8$  Hz), 146.5 (d,  $J_{\text{C-P}} = 47.3$  Hz), 145.7 (d,  $J_{\text{C-P}} = 8.1$  Hz), 136.4, 135.5, 134.7 (d,  $J_{\text{C-P}} = 10.8$  Hz), 133.8, 133.1, 132.8 (d,  $J_{\text{C-P}} = 12.1$  Hz), 132.3, 132.0 (d,  $J_{\text{C-P}} = 2.3$  Hz), 131.7 (d,  $J_{\text{C-P}} = 9.7$  Hz), 131.4, 131.3, 130.9, 130.9 (d,  $J_{\text{C-P}} = 2.7$  Hz), 129.2, 128.7, 128.2, 128.0, 127.9, 127.8, 127.7, 127.6, 127.4, 126.4 (d,  $J_{\text{C-P}} = 6.6$  Hz), 125.1, 124.1, 123.1, 21.8;  $^{31}\text{P}$  NMR (162 MHz,  $\text{CDCl}_3$ )  $\delta$  29.93; **HRMS (ESI, m/z)**: calculated for  $\text{C}_{38}\text{H}_{29}\text{NOP}^+$ : 546.1981, found: 546.1981  $[\text{M}+\text{H}]^+$ .

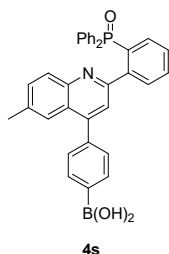

**4s**, Light yellow solid, 37 % yield,  $^1\text{H}$  NMR (400 MHz,  $\text{CDCl}_3$ )  $\delta$  7.77-7.59 (m, 7H), 7.58-7.43 (m, 9H), 7.41 (dd,  $J = 8.5, 1.9$  Hz, 1H), 7.26-7.16 (m, 5H), 2.43 (s, 3H);  $^{13}\text{C}$  NMR (100 MHz,  $\text{CDCl}_3$ )  $\delta$  157.0 (d,  $J_{\text{C-P}} = 3.8$  Hz), 146.5 (d,  $J_{\text{C-P}} = 41.5$  Hz), 145.8 (d,  $J_{\text{C-P}} = 8.1$  Hz), 138.1, 136.3, 134.7 (d,  $J_{\text{C-P}} = 11.0$  Hz), 133.7, 132.7, 132.3, 132.0 (d,  $J_{\text{C-P}} = 2.5$  Hz), 131.7 (d,  $J_{\text{C-P}} = 9.7$  Hz), 131.1 (d,  $J_{\text{C-P}} = 42.0$  Hz), 131.0, 130.9, 129.6, 129.2, 128.4, 128.1, 127.9 (d,  $J_{\text{C-P}} = 12.0$  Hz), 127.7 (d,  $J_{\text{C-P}} = 12.2$  Hz), 124.9, 124.1, 123.0, 21.8;  $^{31}\text{P}$  NMR (162 MHz,  $\text{CDCl}_3$ )  $\delta$  29.80; **HRMS (ESI, m/z)**: calculated for  $\text{C}_{34}\text{H}_{28}\text{BNO}_3\text{P}^+$ : 540.1894, found: 540.1897  $[\text{M}+\text{H}]^+$ .

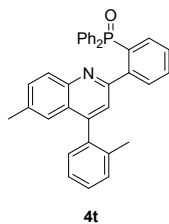

**4t**, Light yellow solid, 68 % yield,  $^1\text{H NMR}$  (400 MHz,  $\text{CDCl}_3$ )  $\delta$  7.78 (dd,  $J = 13.9, 7.4$  Hz, 1H), 7.74-7.63 (m, 4H), 7.62-7.55 (m, 2H), 7.52-7.43 (m, 3H), 7.40-7.27 (m, 7H), 7.27-7.22 (m, 1H), 7.20-7.11 (m, 3H), 7.07(s, 1H), 2.36(s, 3H), 1.97(s, 3H);  $^{13}\text{C NMR}$  (100 MHz,  $\text{CDCl}_3$ )  $\delta$  156.8 (d,  $J_{\text{C-P}} = 3.5$  Hz), 146.5 (d,  $J_{\text{C-P}} = 157.3$  Hz), 145.6 (d,  $J_{\text{C-P}} = 7.5$  Hz), 137.6, 136.2 (d,  $J_{\text{C-P}} = 29.8$  Hz), 135.0 (d,  $J_{\text{C-P}} = 10.8$  Hz), 134.2 (d,  $J_{\text{C-P}} = 7.7$  Hz), 133.1 (d,  $J_{\text{C-P}} = 7.7$  Hz), 131.9 (d,  $J_{\text{C-P}} = 9.6$  Hz), 131.9 (d,  $J_{\text{C-P}} = 2.5$  Hz), 131.6 (d,  $J_{\text{C-P}} = 110.0$  Hz), 131.6 (d,  $J_{\text{C-P}} = 9.7$  Hz), 131.4, 131.1 (d,  $J_{\text{C-P}} = 13.6$  Hz), 131.0 (d,  $J_{\text{C-P}} = 0.9$  Hz), 130.8 (d,  $J_{\text{C-P}} = 2.7$  Hz), 129.7 (d,  $J_{\text{C-P}} = 48.1$  Hz), 128.6 (d,  $J_{\text{C-P}} = 100.4$  Hz), 128.0, 127.9, 127.7 (d,  $J_{\text{C-P}} = 3.8$  Hz), 127.6, 125.6, 124.9 (d,  $J_{\text{C-P}} = 133.9$  Hz), 124.2, 21.7, 20.1;  $^{31}\text{P NMR}$  (162 MHz,  $\text{CDCl}_3$ )  $\delta$  30.51; **HRMS (ESI, m/z)**: calculated for  $\text{C}_{35}\text{H}_{29}\text{NOP}^+$ : 510.1981, found: 510.1982  $[\text{M}+\text{H}]^+$ .

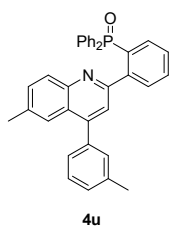

**4u**, Light yellow solid, 68 % yield,  $^1\text{H NMR}$  (400 MHz,  $\text{CDCl}_3$ )  $\delta$  7.77 (dd,  $J = 13.5, 8.0$  Hz, 1H), 7.70-7.57 (m, 6H), 7.56-7.46 (m, 4H), 7.43-7.35 (m, 2H), 7.29-7.23 (m, 5H), 7.22-7.15 (m, 4H), 2.45 (s, 3H), 2.43(s, 3H);  $^{13}\text{C NMR}$  (100 MHz,  $\text{CDCl}_3$ )  $\delta$  157.0 (d,  $J_{\text{C-P}} = 3.8$  Hz), 146.6 (d,  $J_{\text{C-P}} = 79.4$  Hz), 145.7 (d,  $J_{\text{C-P}} = 8.2$  Hz), 138.1, 138.0, 136.2, 134.7 (d,  $J_{\text{C-P}} = 10.7$  Hz), 133.8, 132.8, 132.3, 132.0 (d,  $J_{\text{C-P}} = 2.3$  Hz), 131.7 (d,  $J_{\text{C-P}} = 9.7$  Hz), 131.3, 131.1 (d,  $J_{\text{C-P}} = 42.2$  Hz), 130.9, 130.8, 130.1, 129.0 (d,  $J_{\text{C-P}} = 27.6$  Hz), 128.3, 127.9 (d,  $J_{\text{C-P}} = 12.0$  Hz), 127.7 (d,  $J_{\text{C-P}} = 12.2$  Hz), 126.7, 125.0, 124.1, 122.7, 21.8, 21.5;  $^{31}\text{P NMR}$  (162 MHz,  $\text{CDCl}_3$ )  $\delta$  29.88; **HRMS (ESI, m/z)**: calculated for  $\text{C}_{35}\text{H}_{29}\text{NOP}^+$ : 510.1981, found: 510.1982  $[\text{M}+\text{H}]^+$ .

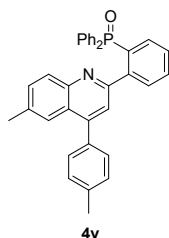

**4v**, Light yellow solid, 69 % yield,  $^1\text{H NMR}$  (400 MHz,  $\text{CDCl}_3$ )  $\delta$  7.75 (dd,  $J = 13.7, 7.6$  Hz, 1H), 7.70-7.53 (m, 8H), 7.52-7.45 (m, 2H), 7.41-7.36 (m, 3H), 7.32 (d,  $J = 8.0$  Hz, 2H), 7.27-7.14 (m, 6H), 2.45(s, 3H), 2.42 (s, 3H);  $^{13}\text{C NMR}$  (100 MHz,  $\text{CDCl}_3$ )  $\delta$  156.9 (d,  $J_{\text{C-P}} = 3.8$  Hz), 146.8, 146.3, 145.8 (d,  $J_{\text{C-P}} = 8.1$  Hz), 138.0, 135.6 (d,  $J_{\text{C-P}} = 102.5$  Hz), 134.7 (d,  $J_{\text{C-P}} = 10.7$  Hz), 133.7, 132.7, 132.3, 132.0 (d,  $J_{\text{C-P}} = 2.4$  Hz), 131.7 (d,  $J_{\text{C-P}} = 9.6$  Hz), 131.3, 131.2, 130.9, 130.8, 130.8, 129.3 (d,  $J_{\text{C-P}} = 35.3$  Hz), 129.2, 127.9 (d,  $J_{\text{C-P}} = 11.9$  Hz), 127.6 (d,  $J_{\text{C-P}} = 12.1$  Hz), 125.0, 123.5 (d,  $J_{\text{C-P}} = 126.2$  Hz), 21.8, 21.2;  $^{31}\text{P NMR}$  (162 MHz,  $\text{CDCl}_3$ )  $\delta$  29.78; **HRMS (ESI, m/z)**: calculated for  $\text{C}_{35}\text{H}_{29}\text{NOP}^+$ : 510.1981, found: 510.1982  $[\text{M}+\text{H}]^+$ .

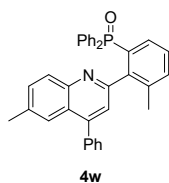

**4w**, Light yellow solid, 53 % yield,  $^1\text{H NMR}$  (400 MHz,  $\text{CDCl}_3$ )  $\delta$  7.93-7.27 (m, 18H), 7.25-

6.84 (br, 4H), 2.46 (s, 3H), 2.15 (s, 3H);  $^{13}\text{C}$  NMR (100 MHz,  $\text{CDCl}_3$ )  $\delta$  156.1 (d,  $J_{\text{C-P}} = 4.8$  Hz), 146.2 (d,  $J_{\text{C-P}} = 3.1$  Hz), 144.5 (d,  $J_{\text{C-P}} = 8.9$  Hz), 137.9, 137.8 (d,  $J_{\text{C-P}} = 9.7$  Hz), 136.3, 134.4 (d,  $J_{\text{C-P}} = 2.5$  Hz), 133.1, 132.5, 132.1, 131.8 (d,  $J_{\text{C-P}} = 9.8$  Hz), 131.5 (d,  $J_{\text{C-P}} = 11.3$  Hz), 131.5, 130.9, 129.8, 129.2, 128.4, 128.1, 127.8, 127.7, 124.8, 124.5, 124.0, 21.8, 20.4;  $^{31}\text{P}$  NMR (162 MHz,  $\text{CDCl}_3$ )  $\delta$  28.91; HRMS (ESI,  $m/z$ ): calculated for  $\text{C}_{35}\text{H}_{29}\text{NOP}^+$ : 510.1981, found: 510.1982  $[\text{M}+\text{H}]^+$ .

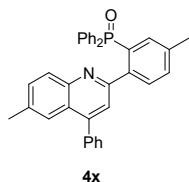

**4x**, Light yellow solid, 65 % yield,  $^1\text{H}$  NMR (400 MHz,  $\text{CDCl}_3$ )  $\delta$  7.70 (d,  $J = 13.9$  Hz, 1H), 7.67-7.59 (m, 4H), 7.56 (dd,  $J = 7.8, 4.6$  Hz, 1H), 7.53-7.36 (m, 10H), 7.27-7.21 (m, 2H), 7.20-7.12 (m, 4H), 2.42 (s, 3H), 2.40 (s, 3H);  $^{13}\text{C}$  NMR (100 MHz,  $\text{CDCl}_3$ )  $\delta$  157.1 (d,  $J_{\text{C-P}} = 3.6$  Hz), 146.5 (d,  $J_{\text{C-P}} = 8.2$  Hz), 142.7 (d,  $J_{\text{C-P}} = 8.2$  Hz), 138.0, 137.9, 136.1, 135.2 (d,  $J_{\text{C-P}} = 10.2$  Hz), 133.8, 132.8, 132.6 (d,  $J_{\text{C-P}} = 2.5$  Hz), 132.0, 131.8 (d,  $J_{\text{C-P}} = 9.8$  Hz), 131.3, 131.0, 130.8, 130.8, 130.7, 129.0 (d,  $J_{\text{C-P}} = 110.8$  Hz), 128.6 (d,  $J_{\text{C-P}} = 97.4$  Hz), 127.6 (d,  $J_{\text{C-P}} = 12.2$  Hz), 124.8, 124.0, 122.8, 21.8, 21.3;  $^{31}\text{P}$  NMR (162 MHz,  $\text{CDCl}_3$ )  $\delta$  30.48; HRMS (ESI,  $m/z$ ): calculated for  $\text{C}_{35}\text{H}_{29}\text{NOP}^+$ : 510.1981, found: 510.1982  $[\text{M}+\text{H}]^+$ .

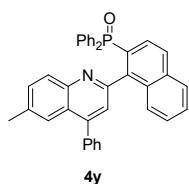

**4y**, Light brown solid, 50 % yield,  $^1\text{H}$  NMR (400 MHz,  $\text{CDCl}_3$ )  $\delta$  8.01-7.86 (m, 4H), 7.81 (dd,  $J = 11.7, 8.6$  Hz, 1H), 7.71-7.64 (m, 2H), 7.60-7.49 (m, 6H), 7.49-7.31 (m, 9H), 7.02-6.74 (m, 3H), 2.48 (s, 3H);  $^{13}\text{C}$  NMR (100 MHz,  $\text{CDCl}_3$ )  $\delta$  155.3 (d,  $J_{\text{C-P}} = 5.5$  Hz), 146.2 (d,  $J_{\text{C-P}} = 16.5$  Hz), 144.3 (d,  $J_{\text{C-P}} = 8.9$  Hz), 137.8, 136.6, 135.0 (d,  $J_{\text{C-P}} = 2.1$  Hz), 132.3, 132.2, 131.4, 131.2, 131.1 (d,  $J_{\text{C-P}} = 8.6$  Hz), 130.4, 129.8, 129.4, 128.8, 128.4, 128.3 (d,  $J_{\text{C-P}} = 5.7$  Hz), 128.2, 128.1, 128.1, 128.0, 127.9, 127.2 (d,  $J_{\text{C-P}} = 12.8$  Hz), 127.0 (d,  $J_{\text{C-P}} = 3.9$  Hz), 125.3, 125.1, 124.1, 21.8;  $^{31}\text{P}$  NMR (162 MHz,  $\text{CDCl}_3$ )  $\delta$  29.26; HRMS (ESI,  $m/z$ ): calculated for  $\text{C}_{38}\text{H}_{28}\text{NOP Na}^+$ : 568.1801, found: 568.1801  $[\text{M}+\text{Na}]^+$ .

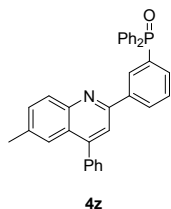

**4z**, Light yellow solid, 63 % yield,  $^1\text{H}$  NMR (400 MHz,  $\text{CDCl}_3$ )  $\delta$  8.61 (d,  $J = 12.8$  Hz, 1H), 8.51-8.42 (m, 1H), 8.09 (d,  $J = 8.6$  Hz, 1H), 7.79-7.68 (m, 5H), 7.64 (s, 1H), 7.62-7.57 (m, 2H), 7.56-7.43 (m, 12H), 2.45 (s, 3H);  $^{13}\text{C}$  NMR (100 MHz,  $\text{CDCl}_3$ )  $\delta$  154.6, 148.7, 147.2, 140.2 (d,  $J_{\text{C-P}} = 11.7$  Hz), 138.2, 136.6, 133.4, 132.9, 132.5, 132.1 (d,  $J_{\text{C-P}} = 49.7$  Hz), 132.1 (d,  $J_{\text{C-P}} = 9.9$  Hz), 131.9 (d,  $J_{\text{C-P}} = 2.7$  Hz), 131.8, 131.0 (d,  $J_{\text{C-P}} = 2.6$  Hz), 130.9 (d,  $J_{\text{C-P}} = 9.8$  Hz), 129.8, 129.0 (d,  $J_{\text{C-P}} = 89.7$  Hz), 128.8 (d,  $J_{\text{C-P}} = 12.5$  Hz), 128.4 (d,  $J_{\text{C-P}} = 6.7$  Hz), 128.3, 125.8, 124.3, 119.2,

21.8;  $^{31}\text{P}$  NMR (162 MHz,  $\text{CDCl}_3$ )  $\delta$  29.46; HRMS (ESI,  $m/z$ ): calculated for  $\text{C}_{34}\text{H}_{27}\text{NOP}^+$ : 496.1825, found: 496.1827  $[\text{M}+\text{H}]^+$ .

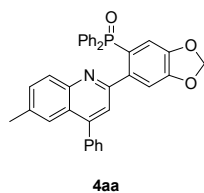

**4aa**, Light yellow solid, 58 % yield,  $^1\text{H}$  NMR (400 MHz,  $\text{CDCl}_3$ )  $\delta$  7.66-7.55 (m, 5H), 7.55-7.42 (m, 7H), 7.40 (dd,  $J = 8.6, 1.7$  Hz, 1H), 7.27-7.09 (m, 8H), 6.05 (s, 2H), 2.42 (s, 3H);  $^{13}\text{C}$  NMR (100 MHz,  $\text{CDCl}_3$ )  $\delta$  156.5 (d,  $J_{\text{C-P}} = 4.1$  Hz), 150.4 (d,  $J_{\text{C-P}} = 2.6$  Hz), 147.4 (d,  $J_{\text{C-P}} = 17.7$  Hz), 146.5 (d,  $J_{\text{C-P}} = 38.2$  Hz), 141.7 (d,  $J_{\text{C-P}} = 9.0$  Hz), 138.0, 136.2, 133.2 (d,  $J_{\text{C-P}} = 105.8$  Hz), 131.6 (d,  $J_{\text{C-P}} = 9.6$  Hz), 131.3, 130.8 (d,  $J_{\text{C-P}} = 2.7$  Hz), 129.6, 129.1, 128.4, 128.1, 127.7 (d,  $J_{\text{C-P}} = 12.2$  Hz), 125.7, 124.9, 124.7, 124.0, 123.1, 114.0 (d,  $J_{\text{C-P}} = 13.3$  Hz), 111.5 (d,  $J_{\text{C-P}} = 12.1$  Hz), 101.9, 21.7;  $^{31}\text{P}$  NMR (162 MHz,  $\text{CDCl}_3$ )  $\delta$  29.45; HRMS (ESI,  $m/z$ ): calculated for  $\text{C}_{35}\text{H}_{27}\text{NO}_3\text{P}^+$ : 540.1723, found: 540.1726  $[\text{M}+\text{H}]^+$ .

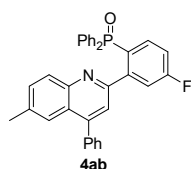

**4ab**, light yellow solid, 63% yield,  $^1\text{H}$  NMR (400 MHz,  $\text{CDCl}_3$ )  $\delta$  7.78-7.68 (m, 1H), 7.66-7.37 (m, 14H), 7.29-7.14 (m, 7H), 2.43 (s, 3H);  $^{13}\text{C}$  NMR (100 MHz,  $\text{CDCl}_3$ )  $\delta$  165.8 (d,  $J_{\text{C-P}} = 2.8$  Hz), 163.3 (d,  $J_{\text{C-P}} = 3.0$  Hz), 155.6 (dd,  $J_{\text{C-F}} = 1.7$  Hz,  $J_{\text{C-P}} = 3.4$  Hz), 148.6 (dd,  $J_{\text{C-F}} = 7.9$  Hz,  $J_{\text{C-P}} = 9.6$  Hz), 146.9, 146.2, 137.8, 137.3 (dd,  $J_{\text{C-F}} = 8.9$  Hz,  $J_{\text{C-P}} = 12.3$  Hz), 136.6, 133.3, 132.2, 131.6, 131.5, 131.0 (d,  $J_{\text{C-P}} = 2.6$  Hz), 129.0 (d,  $J_{\text{C-P}} = 105.9$  Hz), 128.7 (d,  $J_{\text{C-P}} = 89.1$  Hz), 127.8 (d,  $J_{\text{C-P}} = 12.2$  Hz), 127.4 (d,  $J_{\text{C-P}} = 3.3$  Hz), 125.0, 124.0, 122.7, 118.3 (dd,  $J_{\text{C-F}} = 10.6$  Hz,  $J_{\text{C-P}} = 21.9$  Hz), 115.0 (dd,  $J_{\text{C-F}} = 13.0$  Hz,  $J_{\text{C-P}} = 20.4$  Hz), 21.8;  $^{31}\text{P}$  NMR (162 MHz,  $\text{CDCl}_3$ )  $\delta$  28.92;  $^{19}\text{F}$  NMR (376 MHz,  $\text{CDCl}_3$ )  $\delta$  -106.54; HRMS (ESI,  $m/z$ ): calculated for  $\text{C}_{34}\text{H}_{26}\text{FNOP}^+$ : 514.1731, found: 514.1731  $[\text{M}+\text{H}]^+$ .

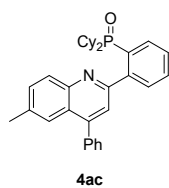

**4ac**, yellow solid, 37% yield,  $^1\text{H}$  NMR (400 MHz,  $\text{CDCl}_3$ )  $\delta$  8.31 (ddd,  $J = 10.7, 5.6, 3.5$  Hz, 1H), 8.06 (d,  $J = 8.5$  Hz, 1H), 7.75 (s, 1H), 7.65 (dd,  $J = 8.5, 1.4$  Hz, 1H), 7.61-7.50 (m, 8H), 7.47 (s, 1H), 2.53 (s, 3H), 1.89-1.53 (m, 13H), 1.35-1.23 (m, 3H), 1.19-1.09 (m, 2H), 0.99-0.90 (m, 4H);  $^{13}\text{C}$  NMR (100 MHz,  $\text{CDCl}_3$ )  $\delta$  158.5 (d,  $J_{\text{C-P}} = 2.0$  Hz), 148.6, 146.1, 142.8 (d,  $J_{\text{C-P}} = 8.0$  Hz), 137.9, 137.0, 132.4, 131.4, 130.7 (d,  $J_{\text{C-P}} = 2.3$  Hz), 130.6, 130.2 (d,  $J_{\text{C-P}} = 8.8$  Hz), 129.4, 129.0, 128.6, 128.5, 128.2 (d,  $J_{\text{C-P}} = 9.4$  Hz), 125.3, 124.7, 122.4, 38.7, 38.0, 26.7 (dd,  $J_{\text{C-P}} = 12.9, 9.3$  Hz), 26.4 (dd,  $J_{\text{C-P}} = 11.7, 3.5$  Hz), 25.7, 21.9;  $^{31}\text{P}$  NMR (162 MHz,  $\text{CDCl}_3$ )  $\delta$  50.17; HRMS (ESI,  $m/z$ ): calculated for  $\text{C}_{34}\text{H}_{39}\text{NOP}^+$ : 508.2764, found: 508.2763  $[\text{M}+\text{H}]^+$ .

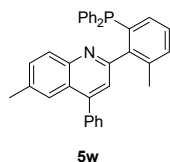

**5w**, White solid, 73 % yield,  $^1\text{H NMR}$  (300 MHz,  $\text{CDCl}_3$ )  $\delta$  7.87 (d,  $J = 8.6$  Hz, 1H), 7.61 (s, 1H), 7.44 (d,  $J = 8.5$  Hz, 1H), 7.36 – 7.27 (m, 3H), 7.24 – 7.08 (m, 14H), 6.92 – 6.83 (m, 2H), 2.38 (s, 3H), 2.10 (s, 3H);  $^{13}\text{C NMR}$  (75 MHz,  $\text{CDCl}_3$ )  $\delta$  158.3 (d,  $J_{\text{C-P}} = 5.4$  Hz), 146.9, 146.6, 146.4, 146.0, 138.1, 137.7, 137.5, 136.5, 136.4, 136.3, 134.1, 133.8, 131.5 (d,  $J_{\text{C-P}} = 5.5$  Hz), 131.0, 129.7, 129.6, 128.3, 128.2, 128.0, 125.1, 124.2, 123.9 (d,  $J_{\text{C-P}} = 5.5$  Hz), 21.8, 20.4;  $^{31}\text{P NMR}$  (121 MHz,  $\text{CDCl}_3$ )  $\delta$  -12.15; **HRMS (ESI, m/z)**: calculated for  $\text{C}_{35}\text{H}_{29}\text{NP}^+$ : 494.2032, found: 494.2032  $[\text{M}+\text{H}]^+$ .

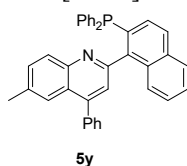

**5y**, Light yellow solid, 80 % yield,  $^1\text{H NMR}$  (300 MHz,  $\text{CDCl}_3$ )  $\delta$  7.98–7.92 (m, 1H), 7.73 (dd,  $J = 16.2, 7.5$  Hz, 3H), 7.49 (t,  $J = 7.6$  Hz, 2H), 7.42 – 7.10 (m, 19H), 2.41 (s, 3H);  $^{13}\text{C NMR}$  (75 MHz,  $\text{CDCl}_3$ )  $\delta$  157.5 (d,  $J_{\text{C-P}} = 7.5$  Hz), 147.0, 146.7, 145.6, 145.2, 138.1, 136.6, 133.9, 133.7, 133.6, 132.2, 132.1, 131.6, 129.9, 129.8, 129.6, 128.4, 128.3, 128.1, 127.9, 126.6, 126.5, 126.5, 126.5, 125.3, 124.8, 124.8, 21.8;  $^{31}\text{P NMR}$  (121 MHz,  $\text{CDCl}_3$ )  $\delta$  -11.92; **HRMS (ESI, m/z)**: calculated for  $\text{C}_{38}\text{H}_{29}\text{NP}^+$ : 530.2032, found: 530.2031  $[\text{M}+\text{H}]^+$ .

## 7. References

- [1] M. L. Abrams, F. Foarta and C. R. Landis, *J. Am. Chem. Soc.*, 2014, **136**, 14583.
- [2] A. K. Morri, Y. Thummala and V. R. Doddi, *Org. Lett.*, 2015, **17**, 4640.
- [3] X. Qi, H. Zhang, Z. Pan, R.-B. Liang, C. Zhu, J. Li, Q. Tong, X. Gao, L. Wu and J. Zhong, *Chem. Commun.*, 2019, **55**, 10848.
- [4] V. Ravindar, H. Hemling, H. Schumann and J. Blum, *Synth. Commun.*, 1992, **22**, 1453.
- [5] W. Ren, Q.-M. Zuo and S.-D. Yang, *Synlett*, 2019, **30**, 1719.
- [6] G. London, M. Von, W. Rakowski, O. Dumile, W. B. Schweizer, J.-P. Gisselbrecht, C. Boudon and F. Diederich, *Chem. Sci.*, 2014, **5**, 965.
- [7] F. Puls, N. Richter, O. Kataeva and H. J. Knolker, *Chem. Eur. J.*, 2017, **23**, 17576.

## 7. Copies of NMR spectra

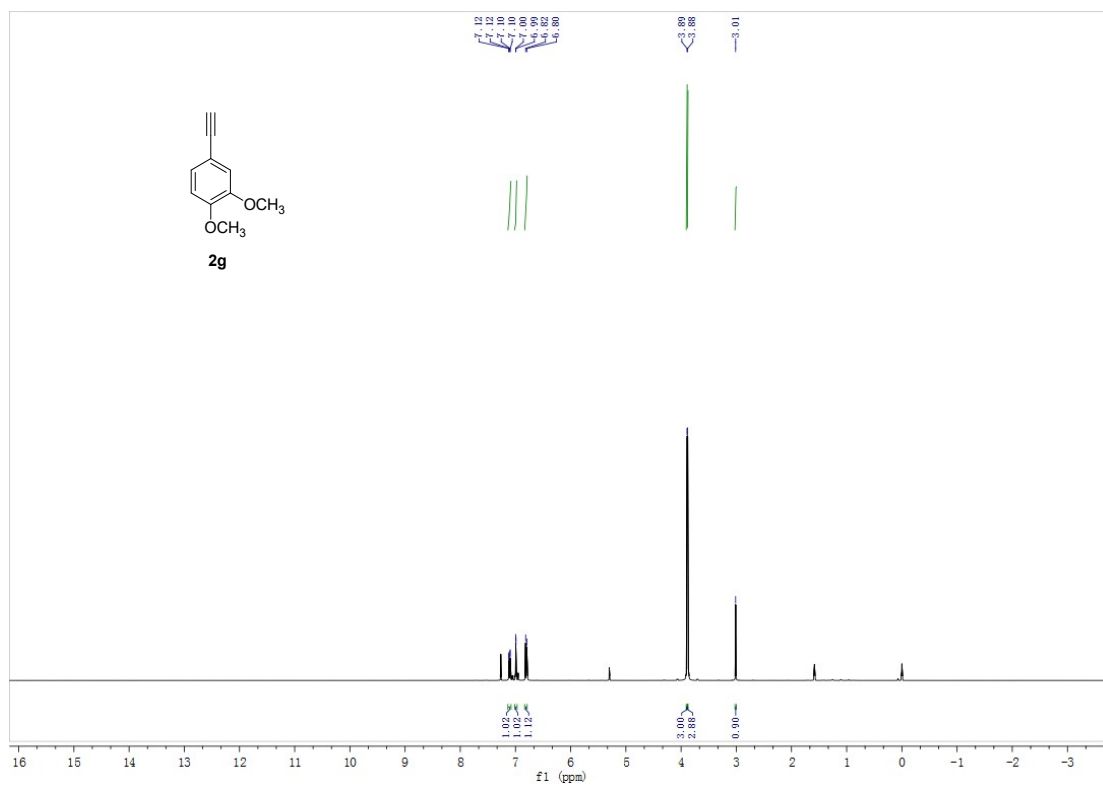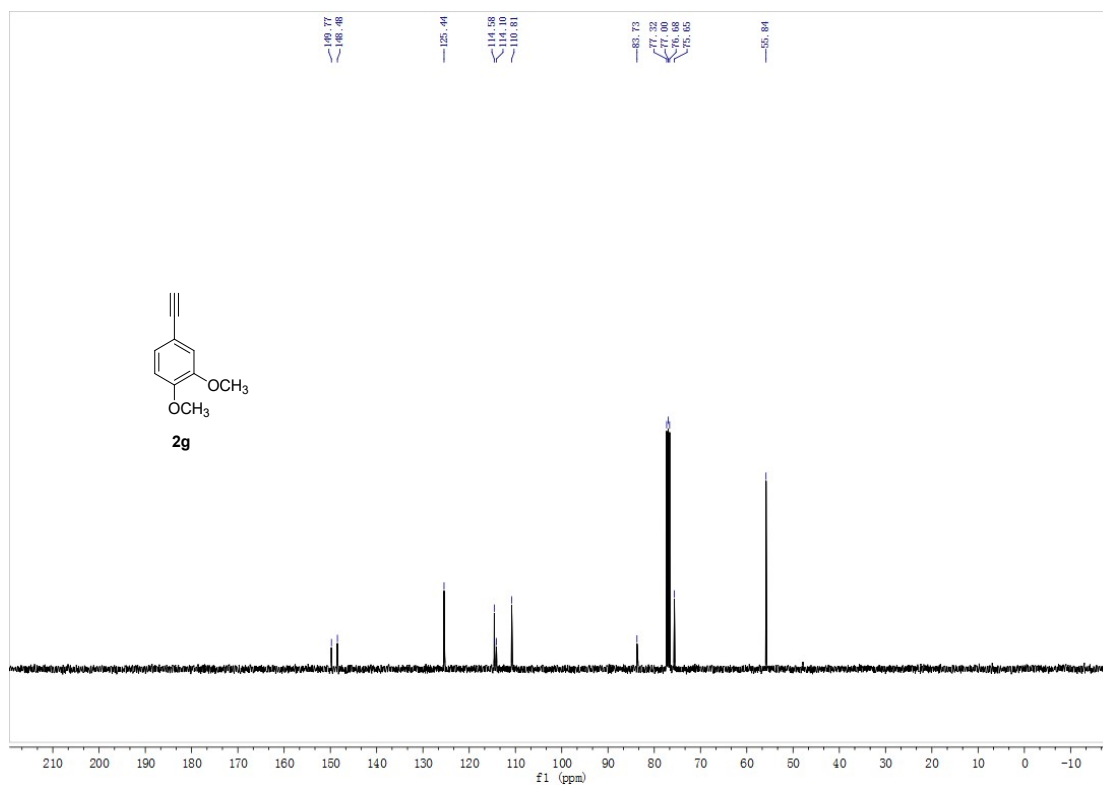

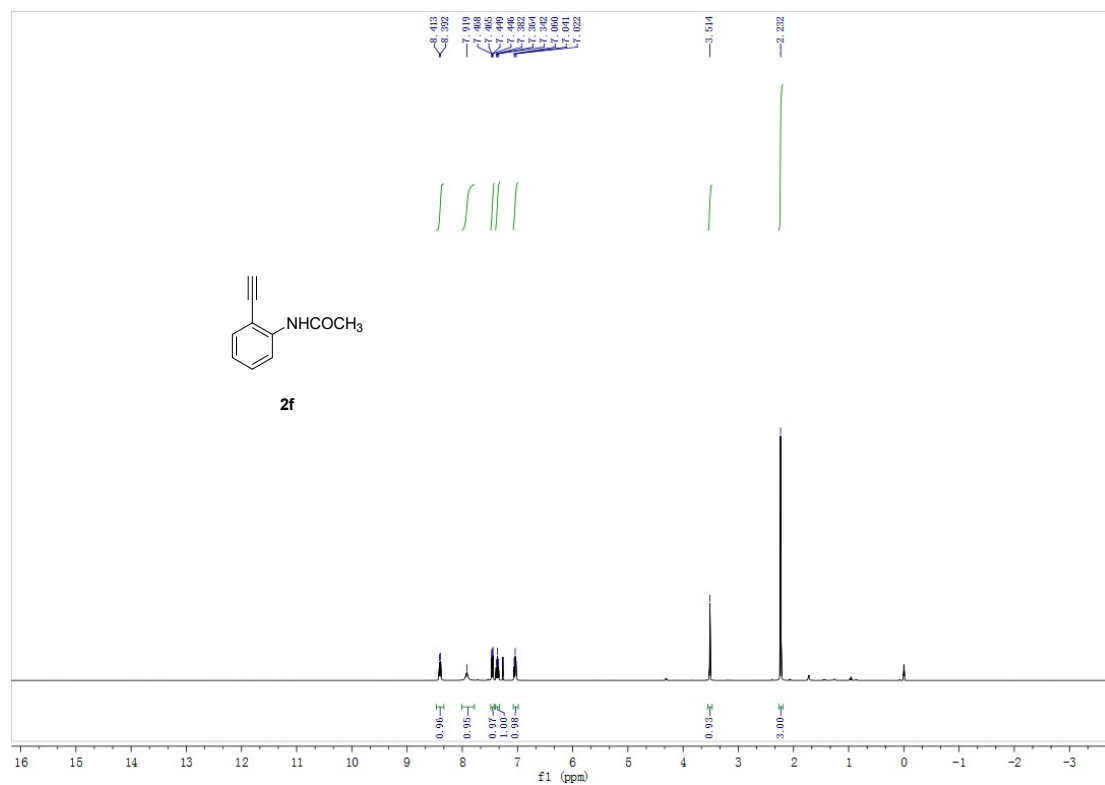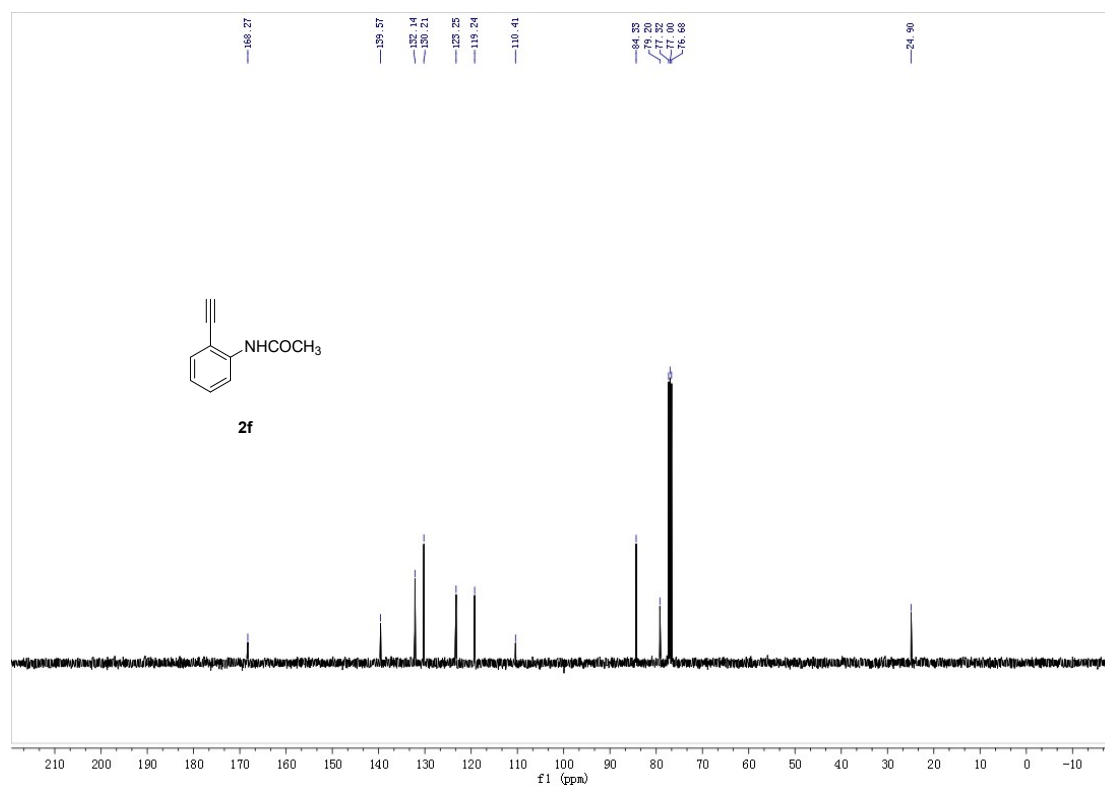

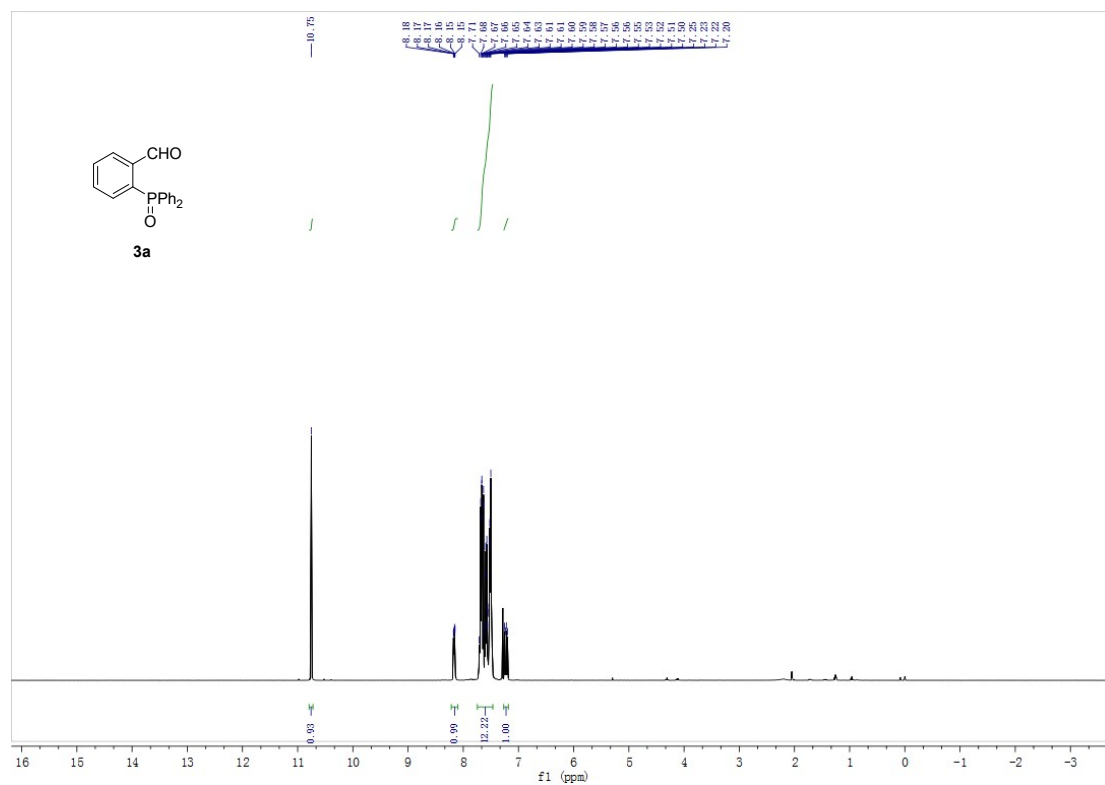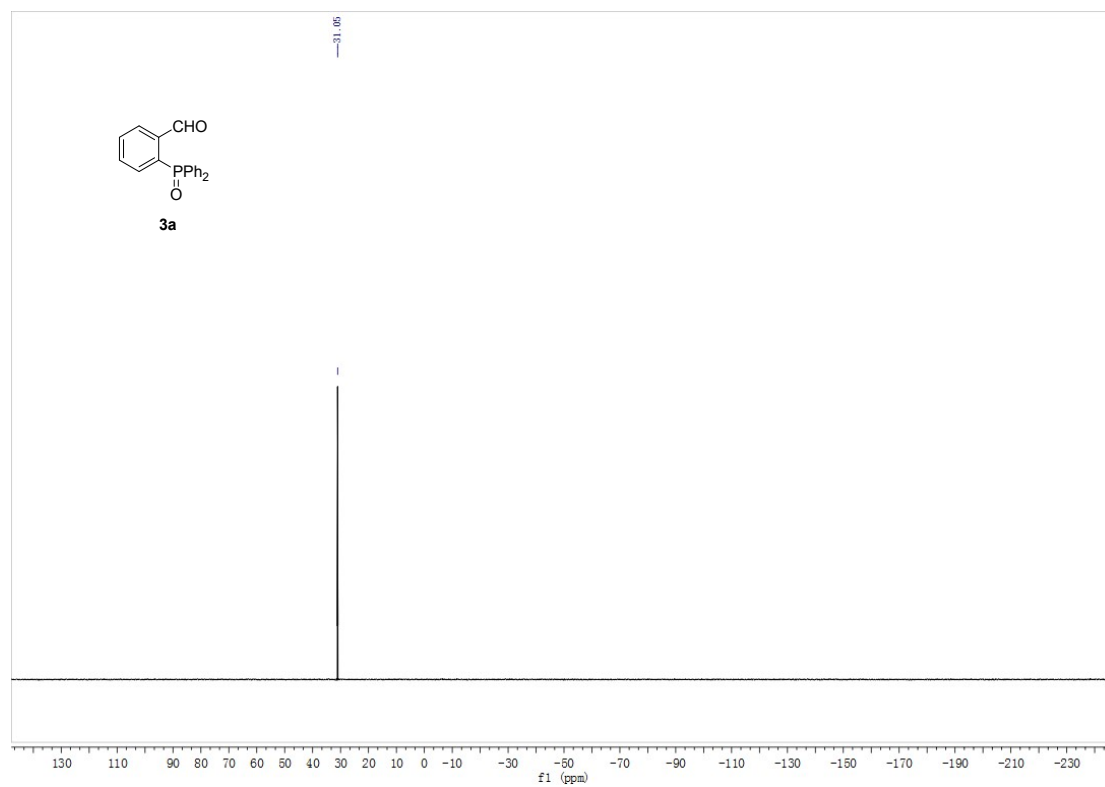



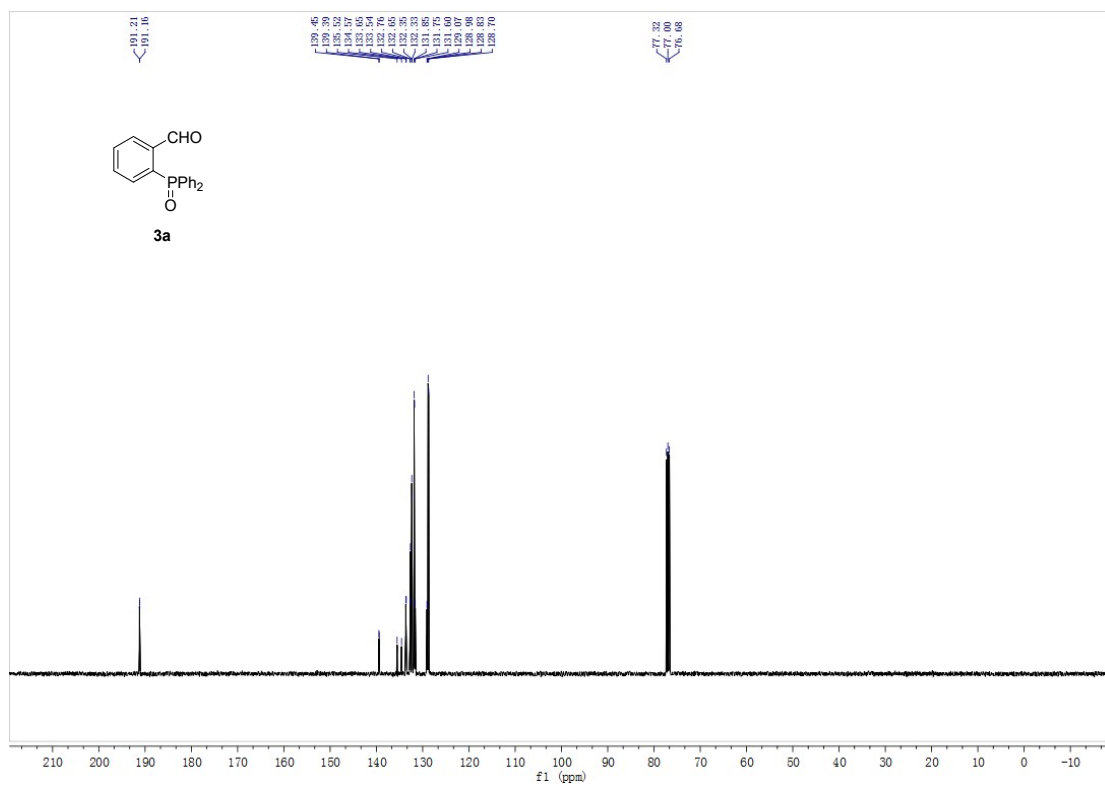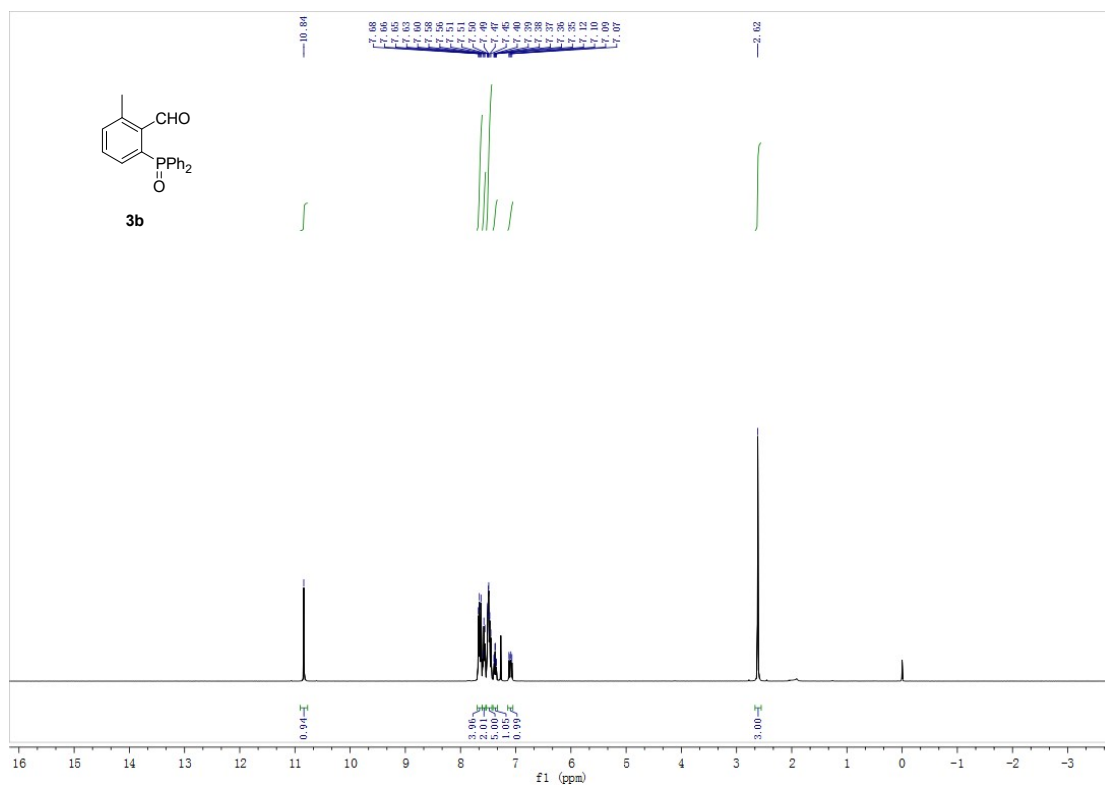

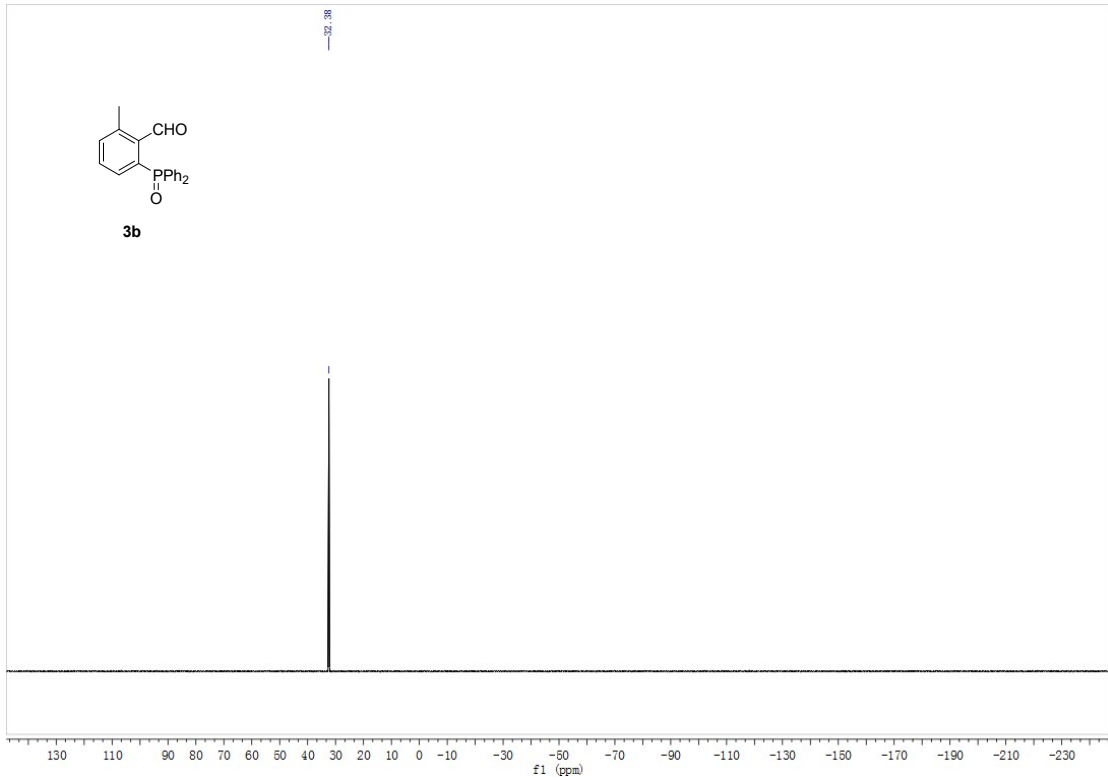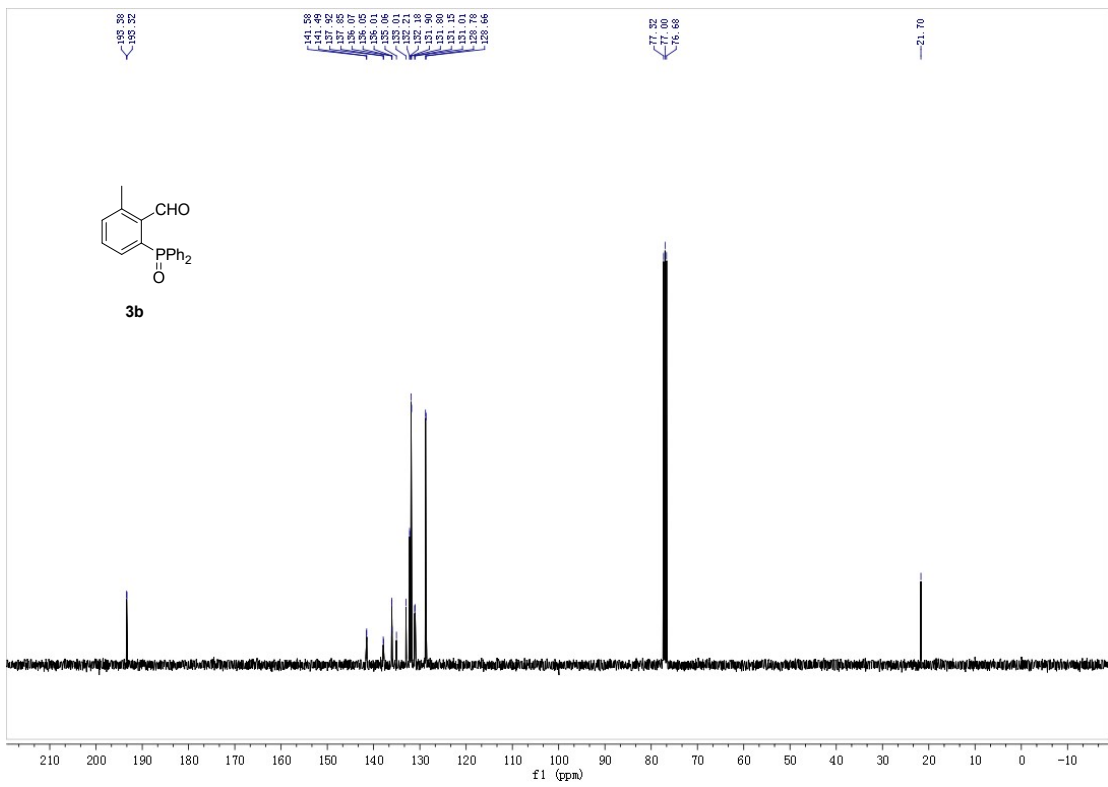

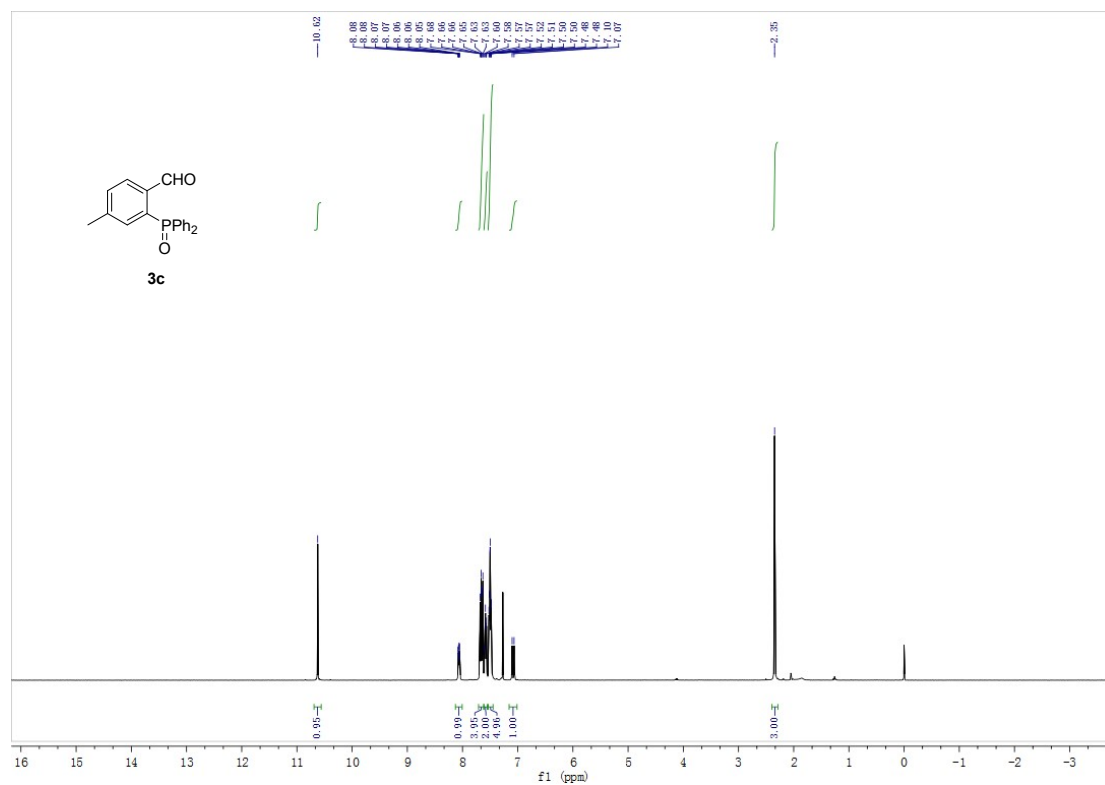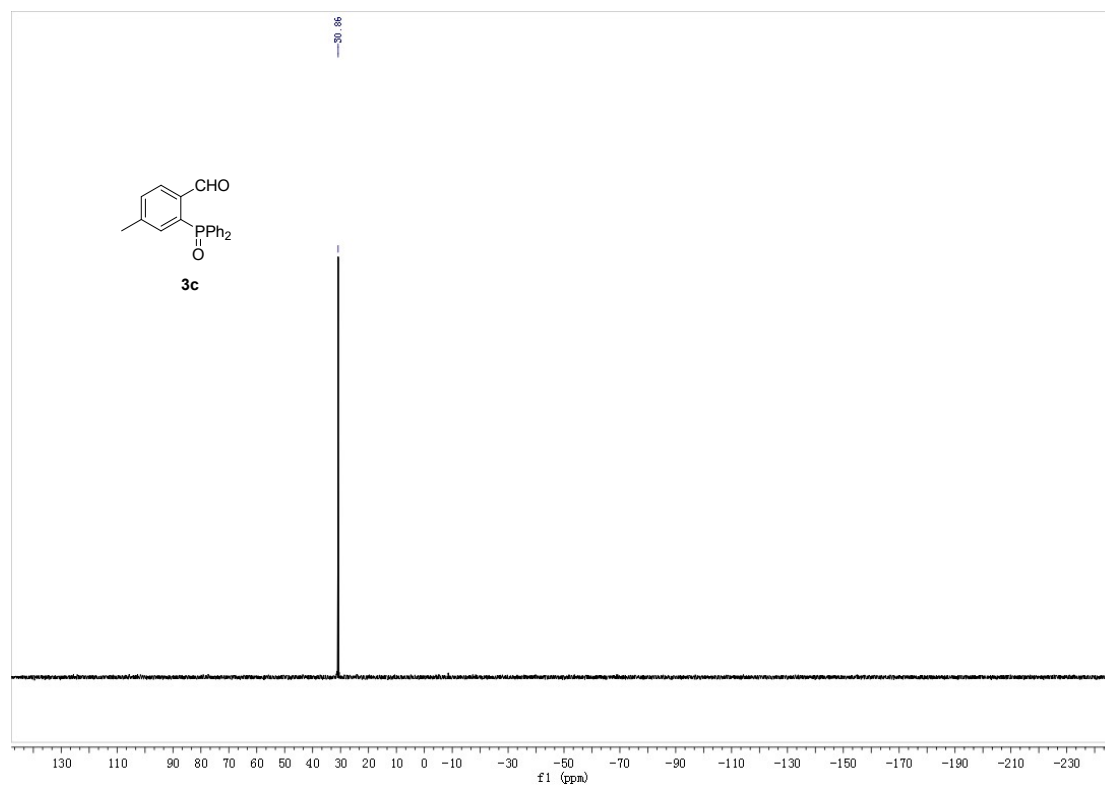

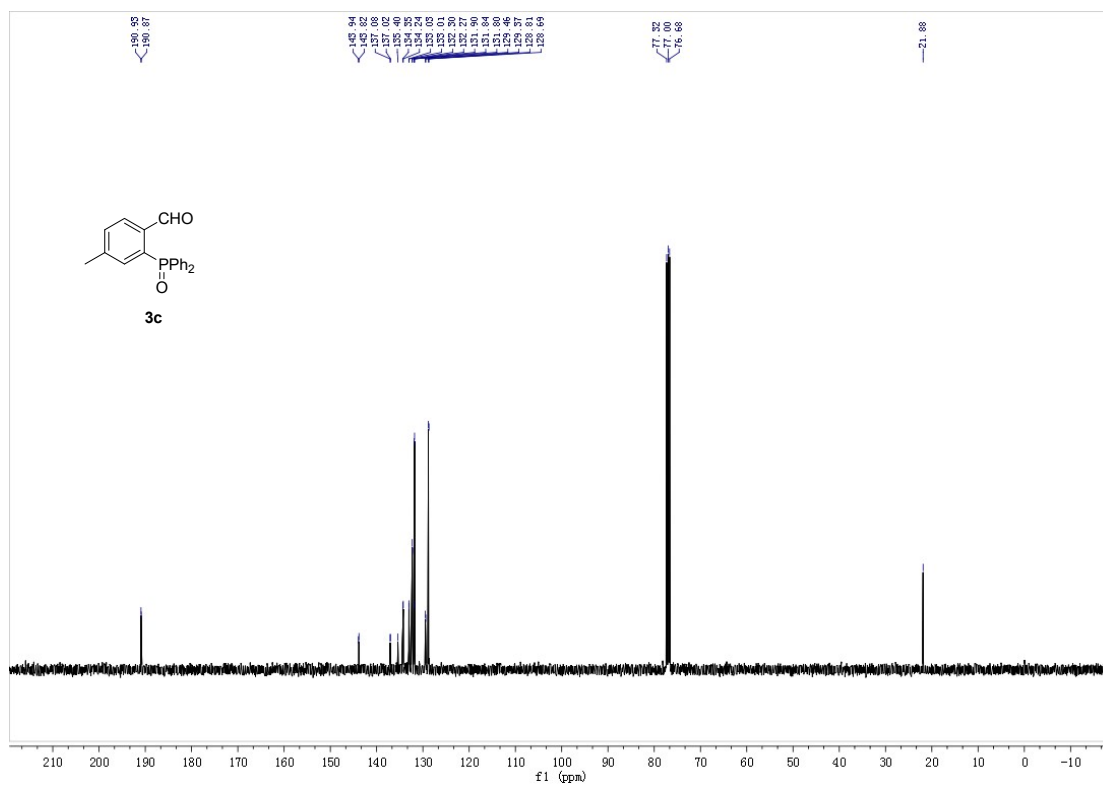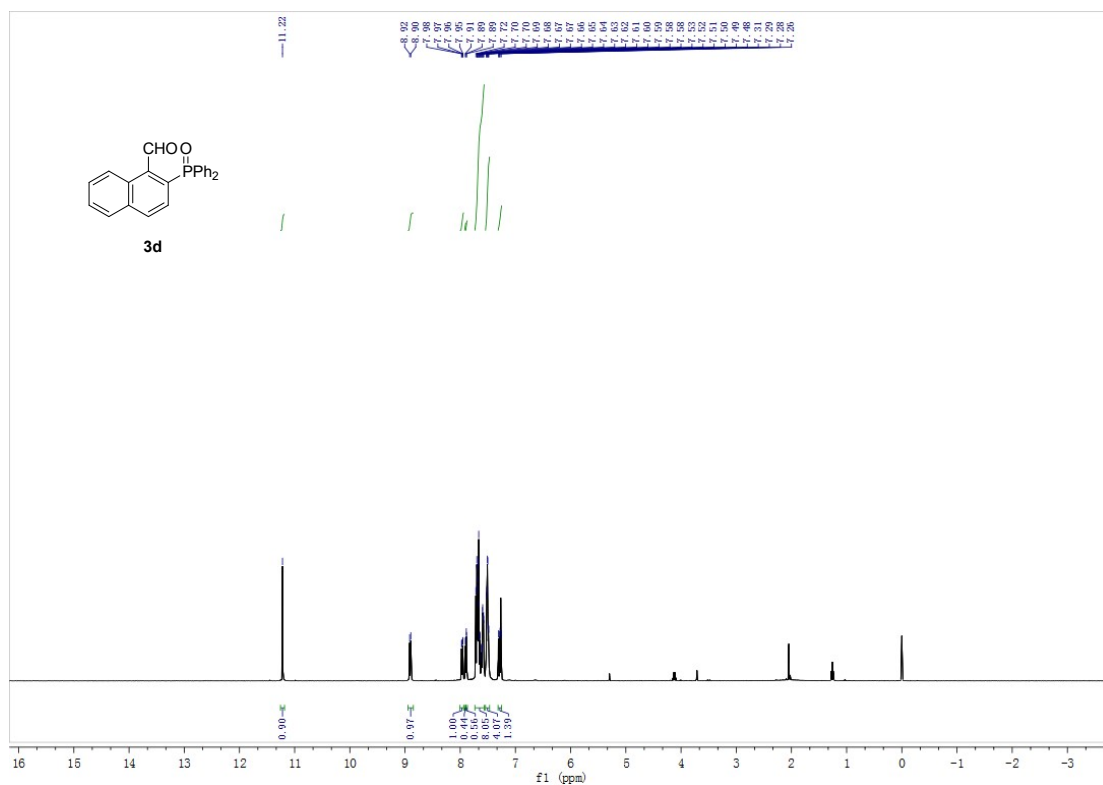

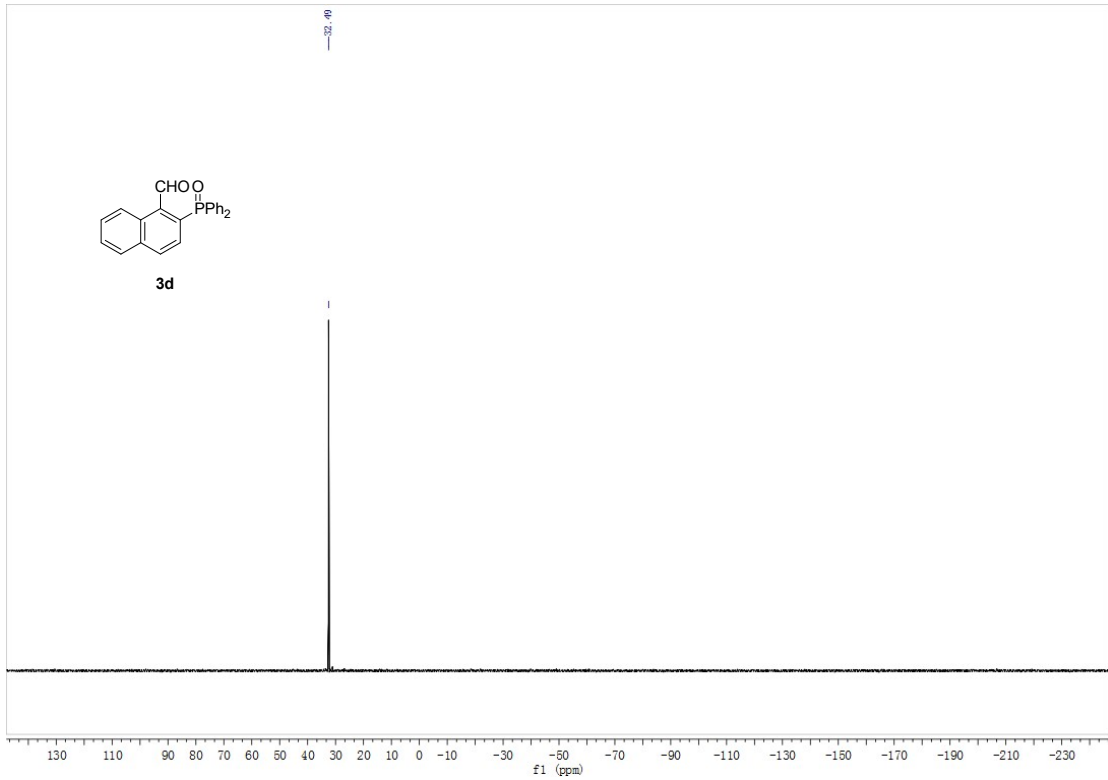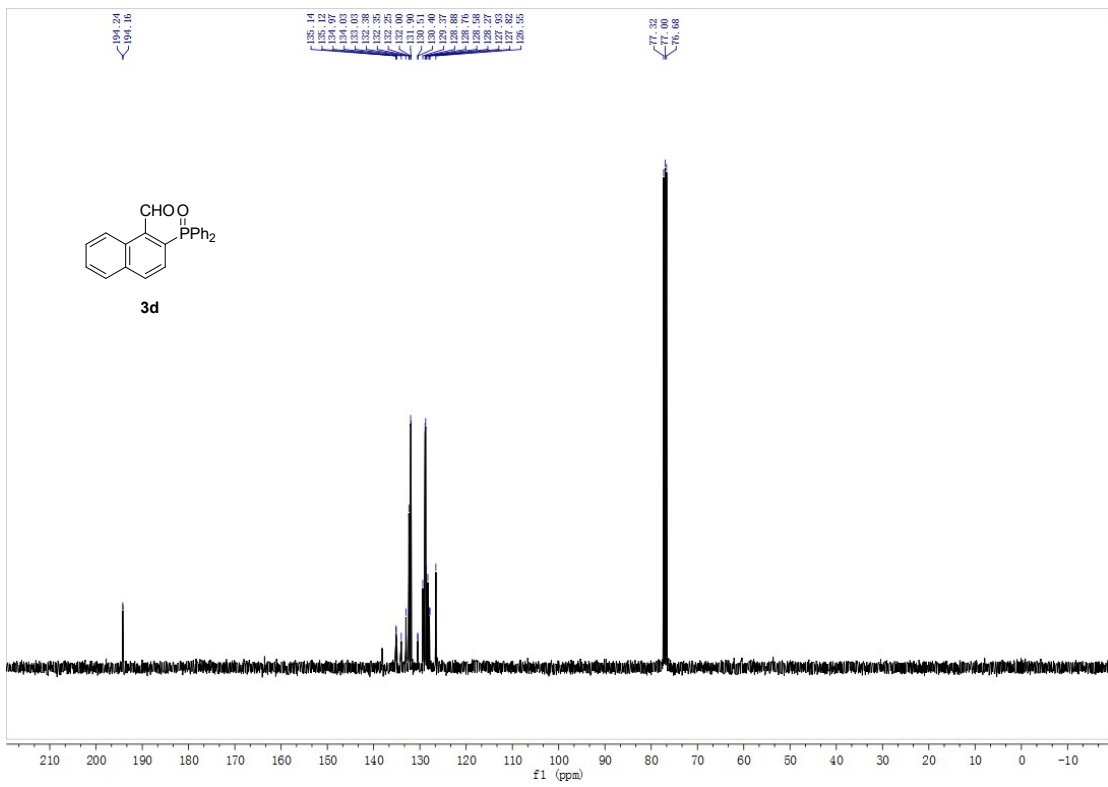

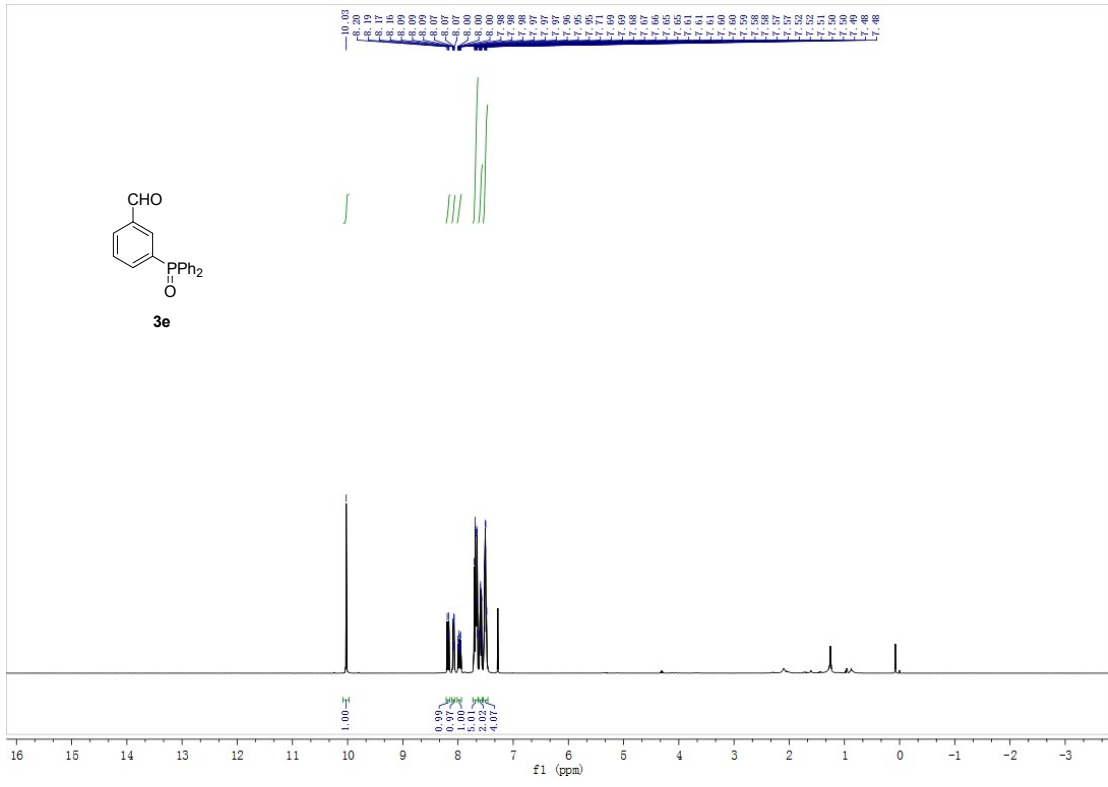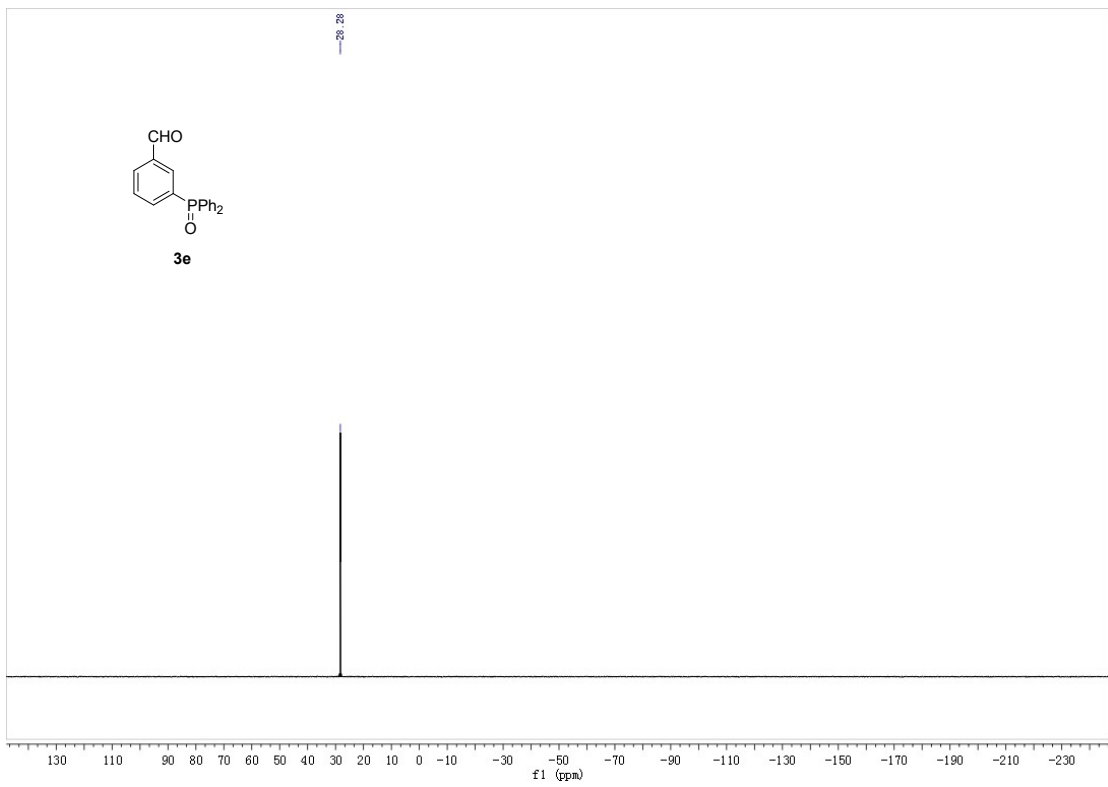

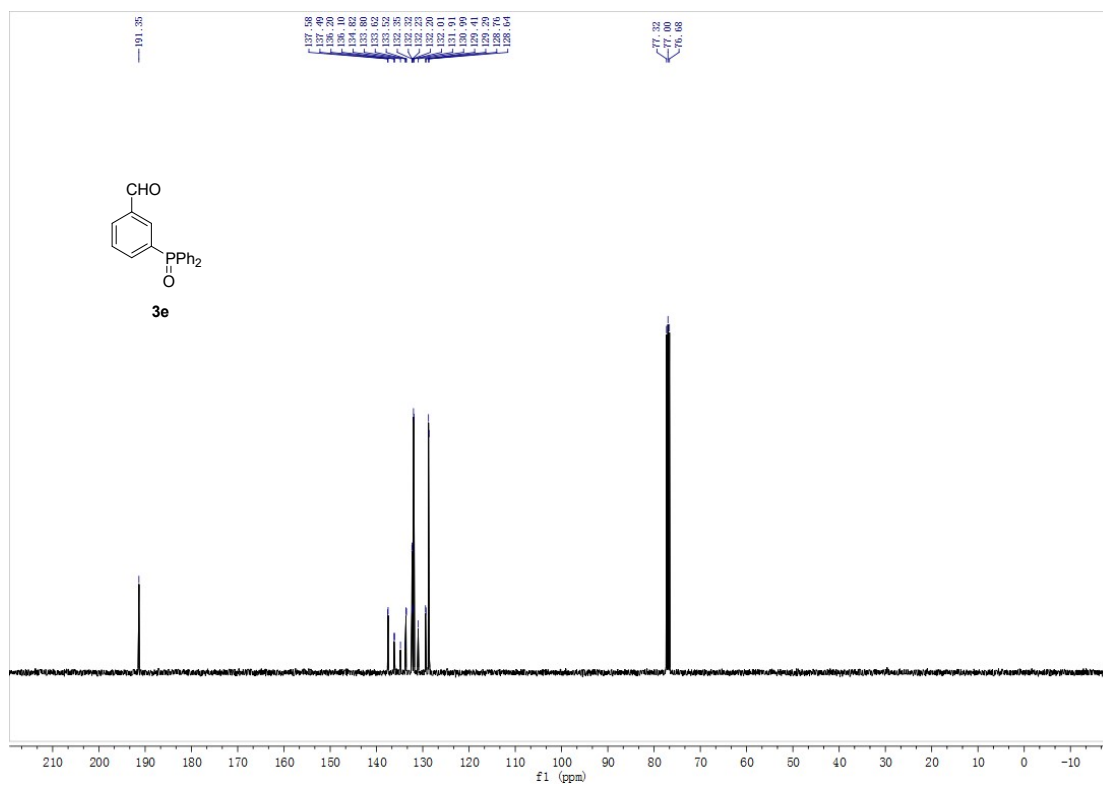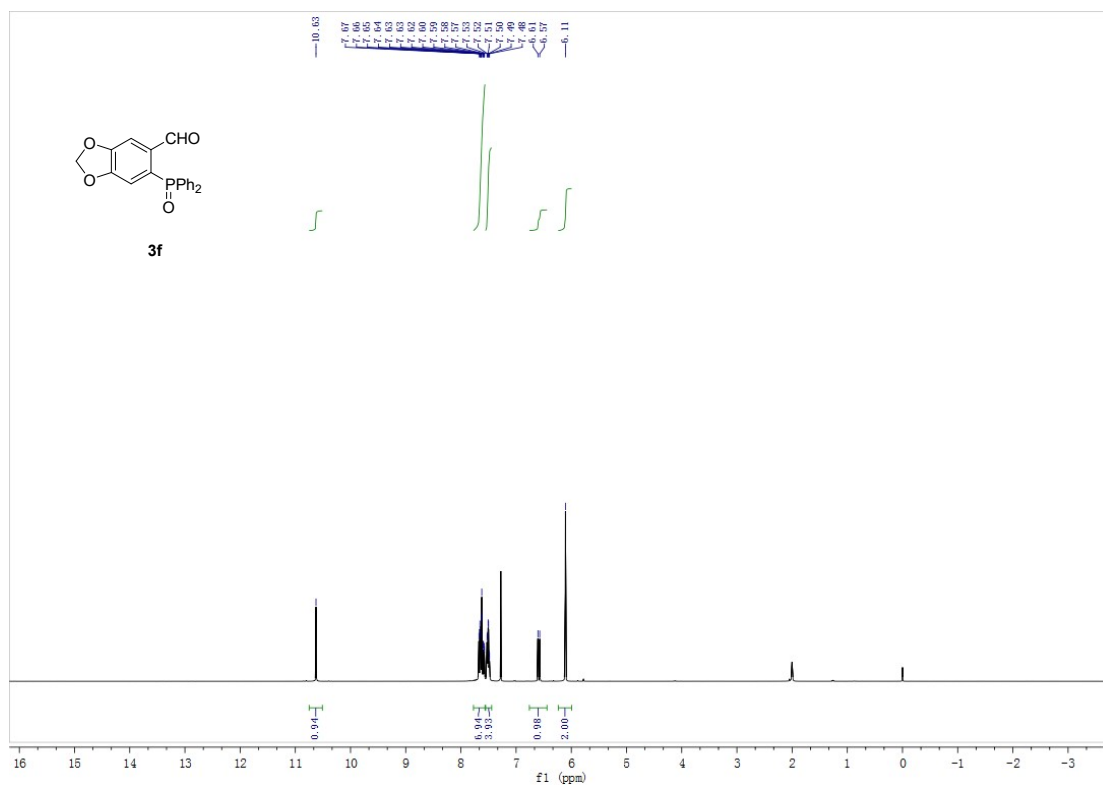

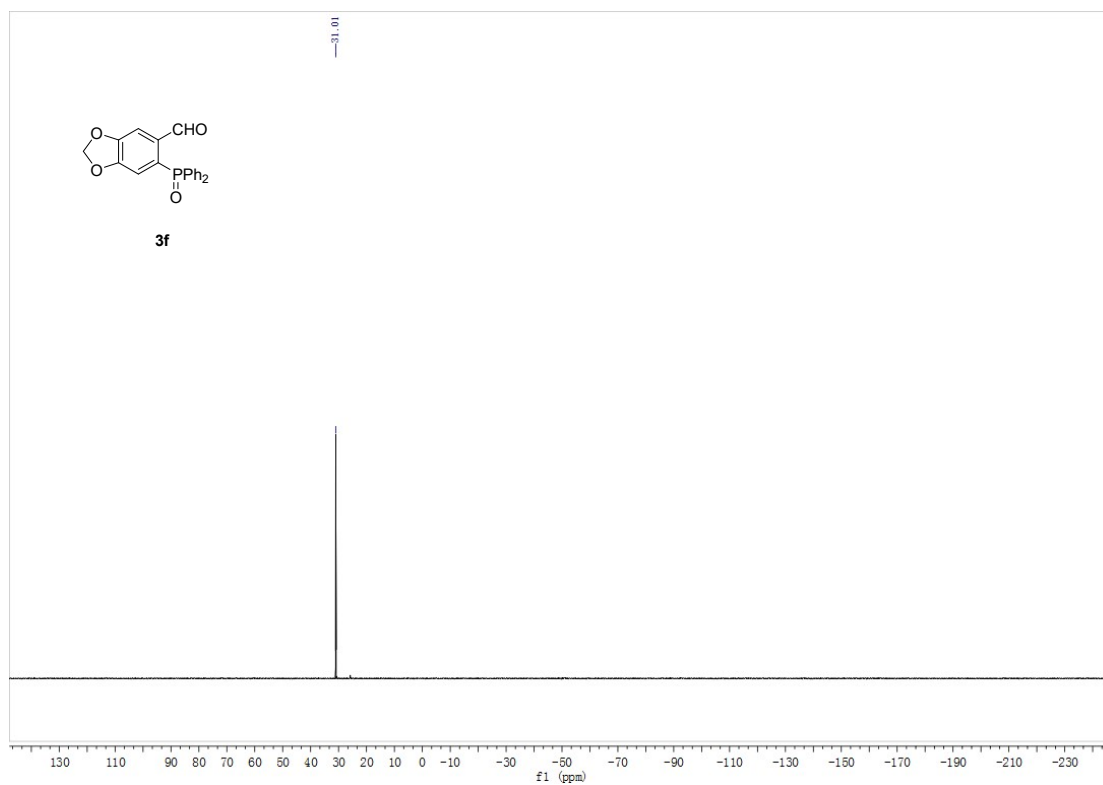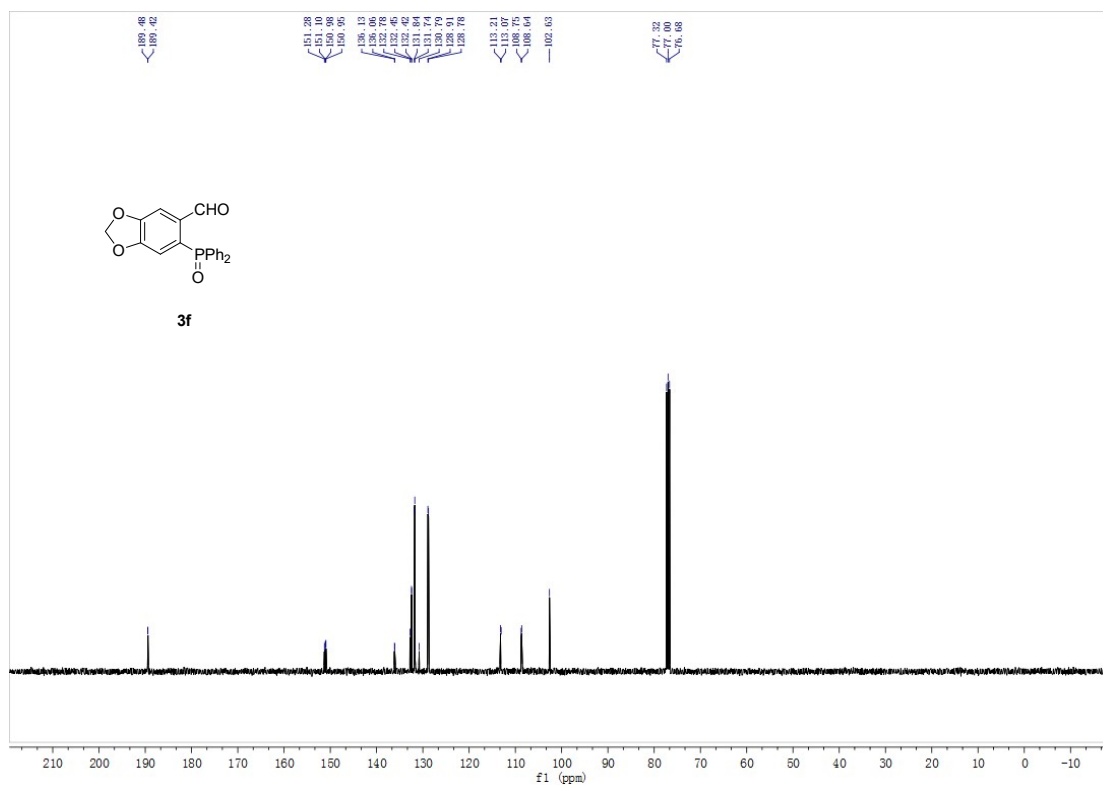





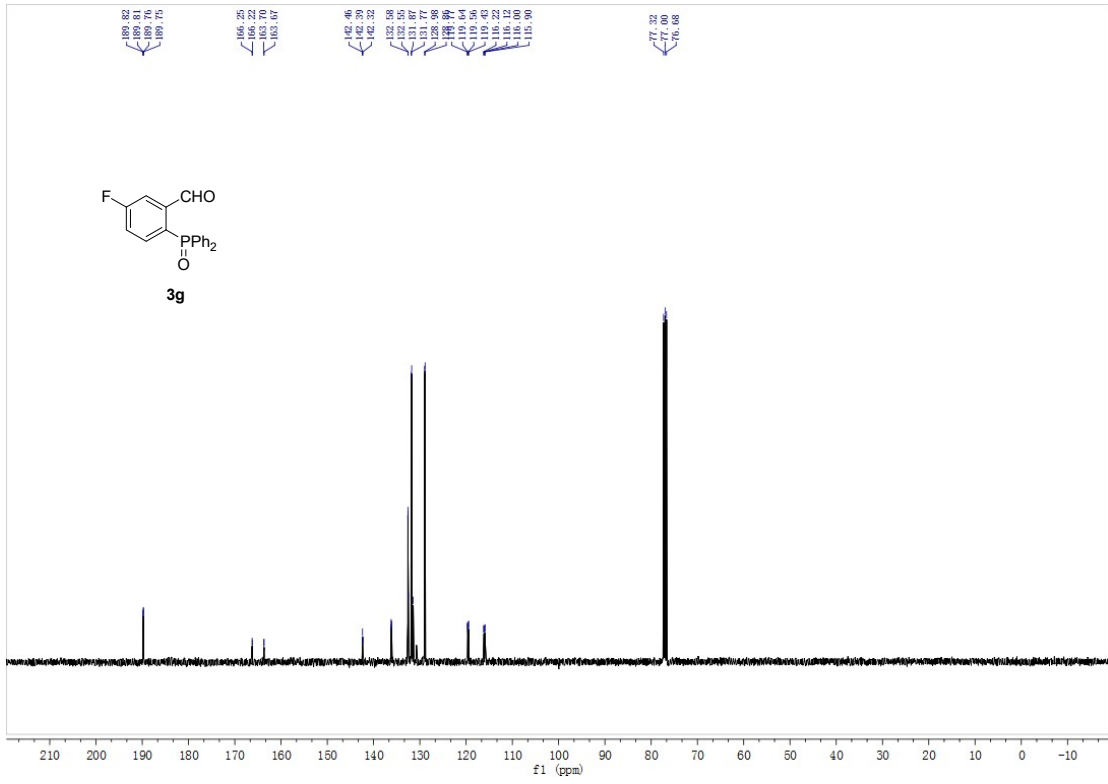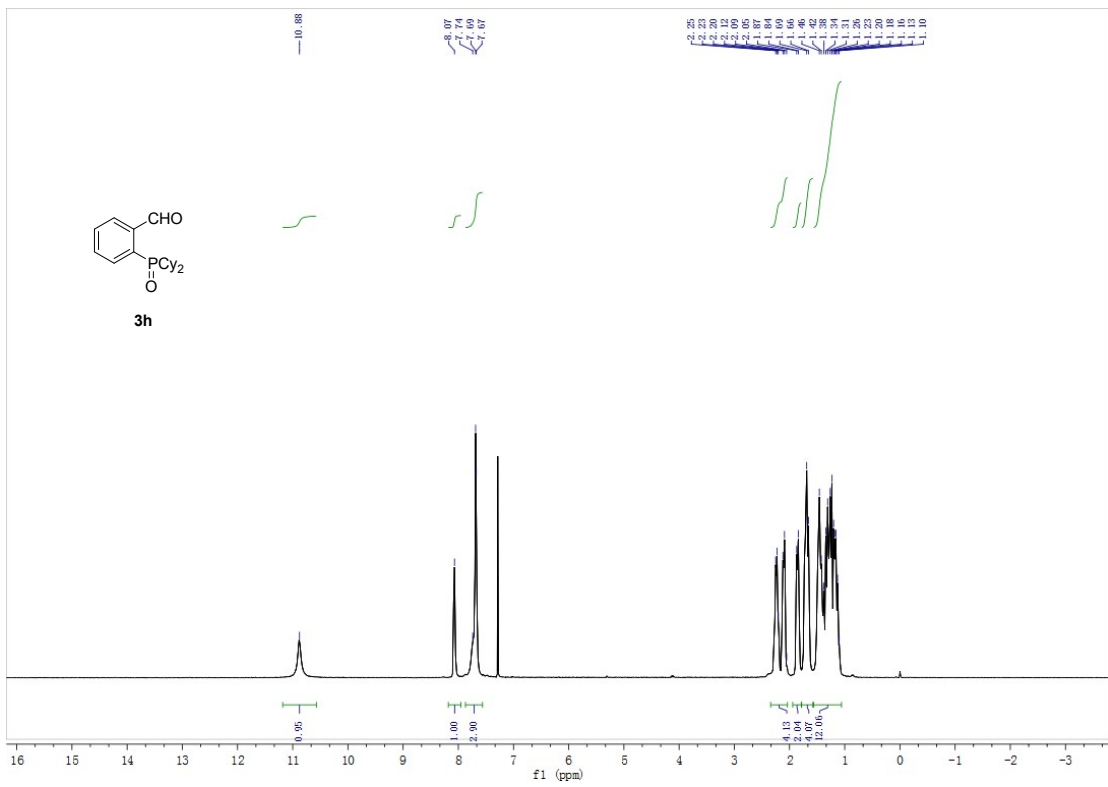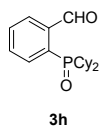

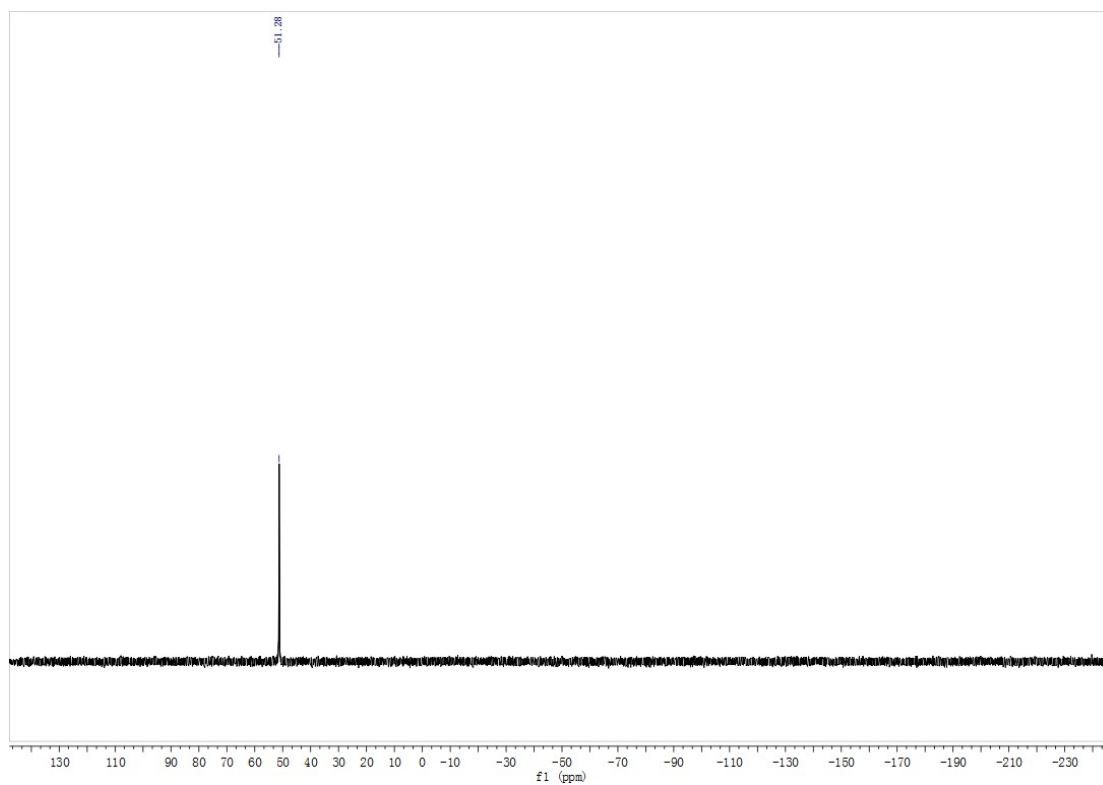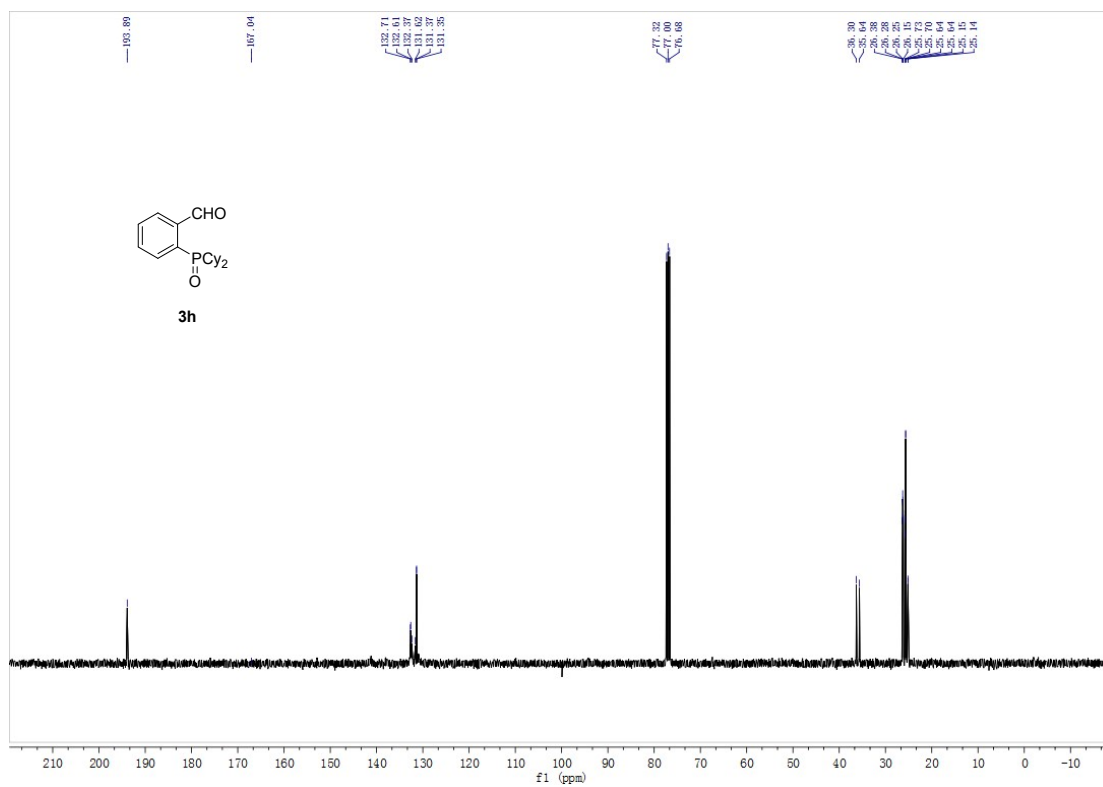

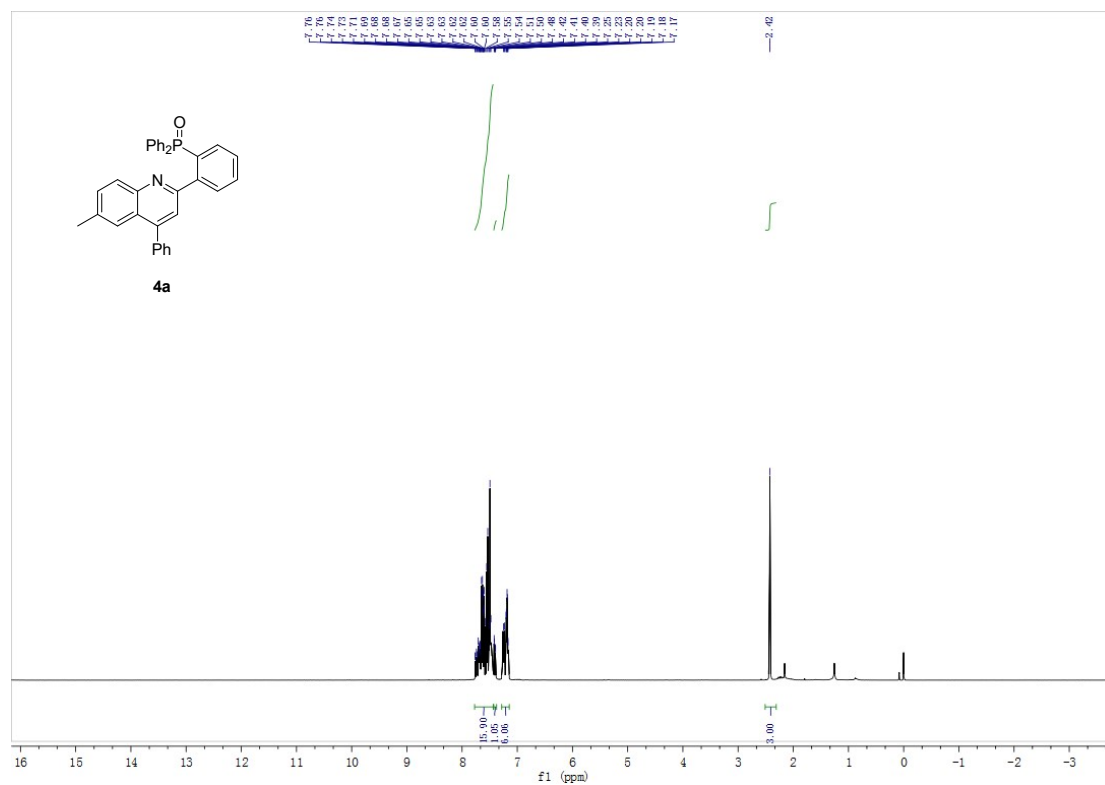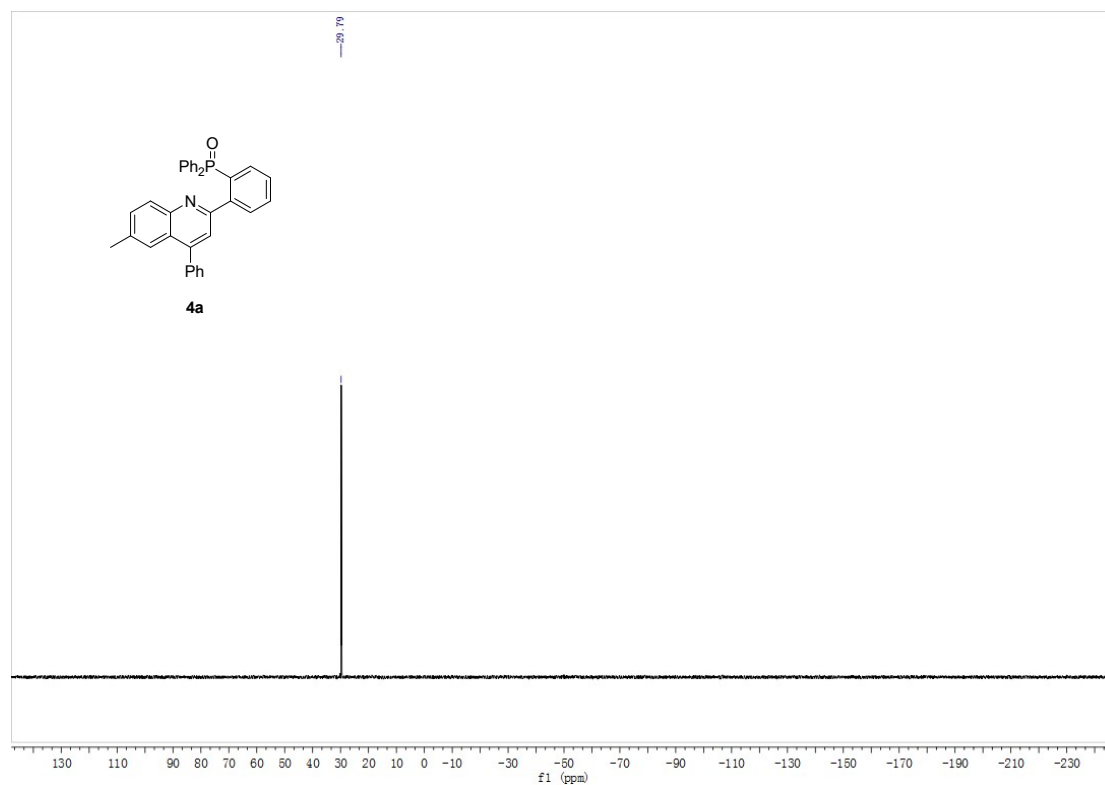

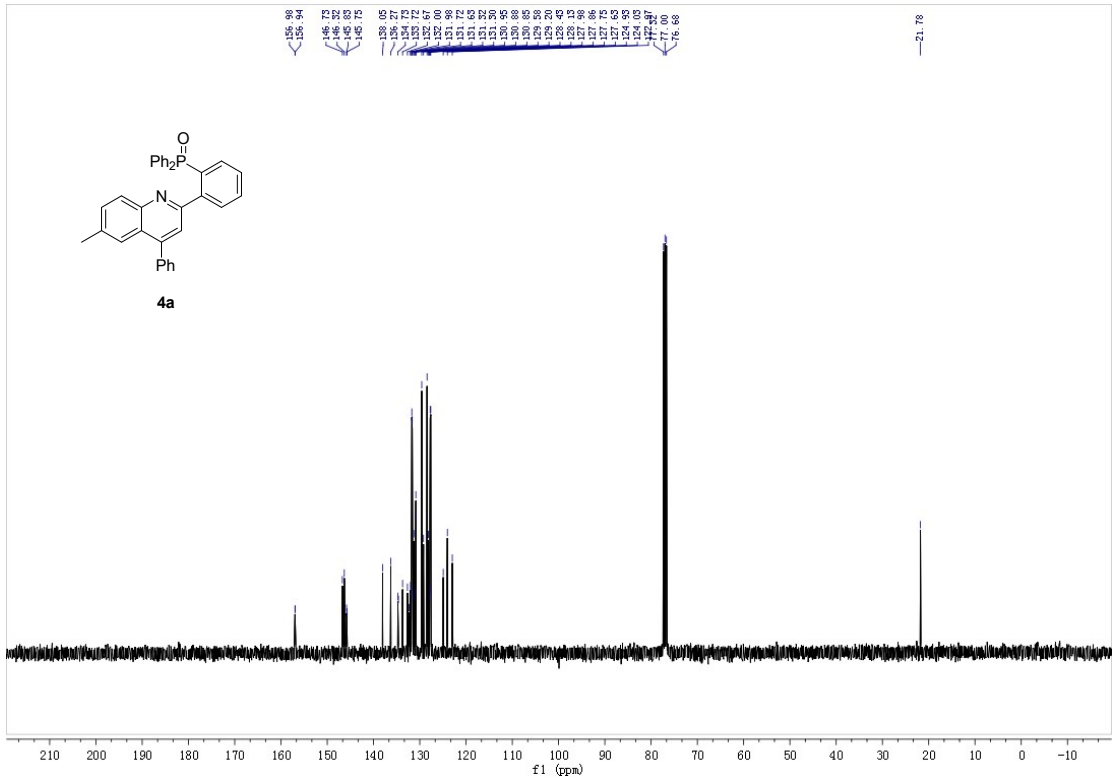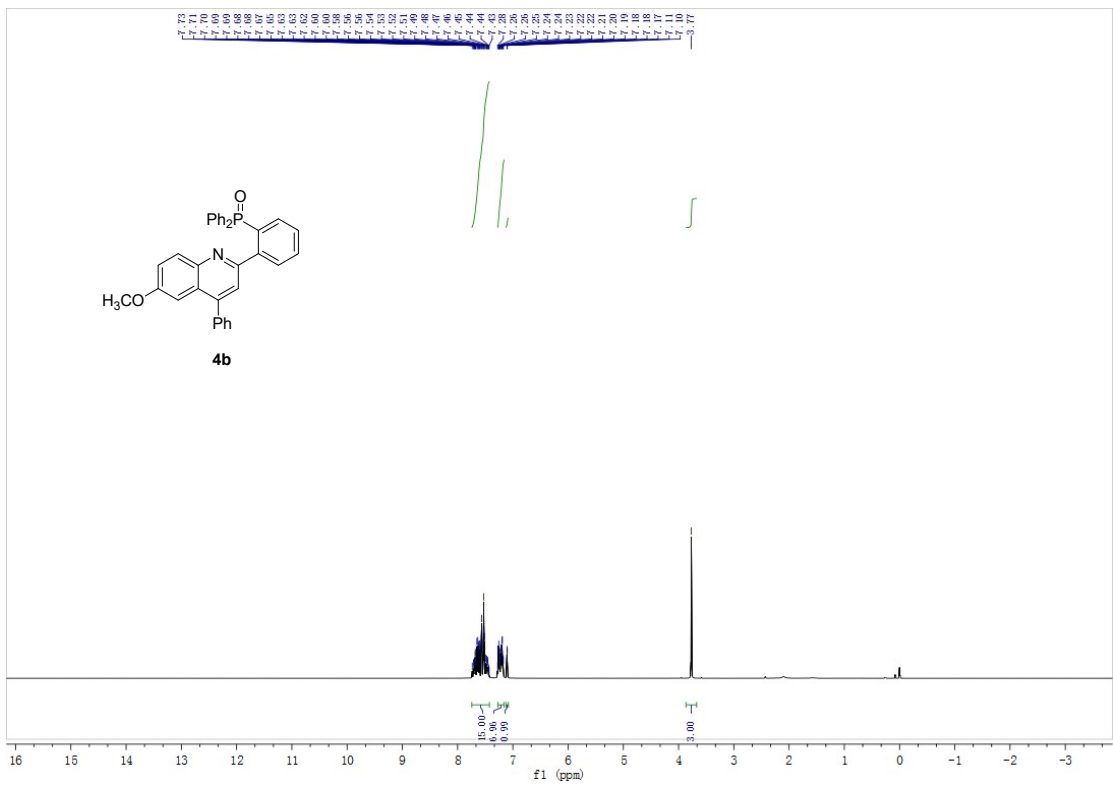

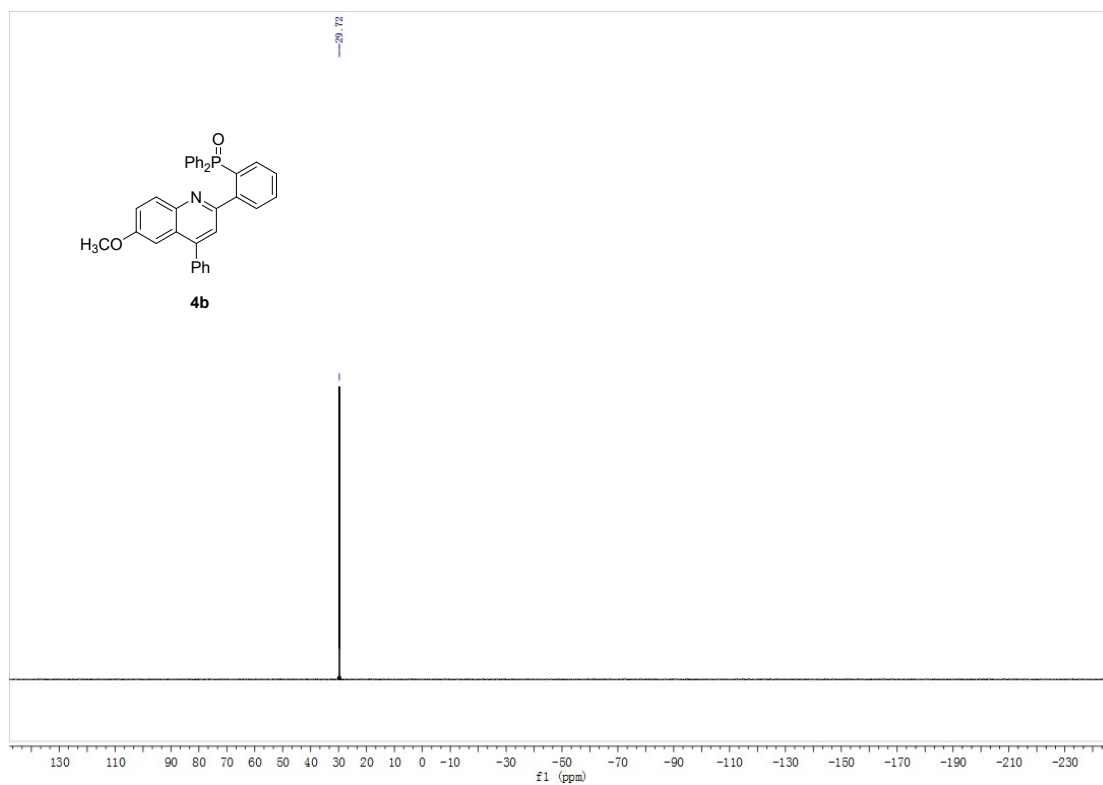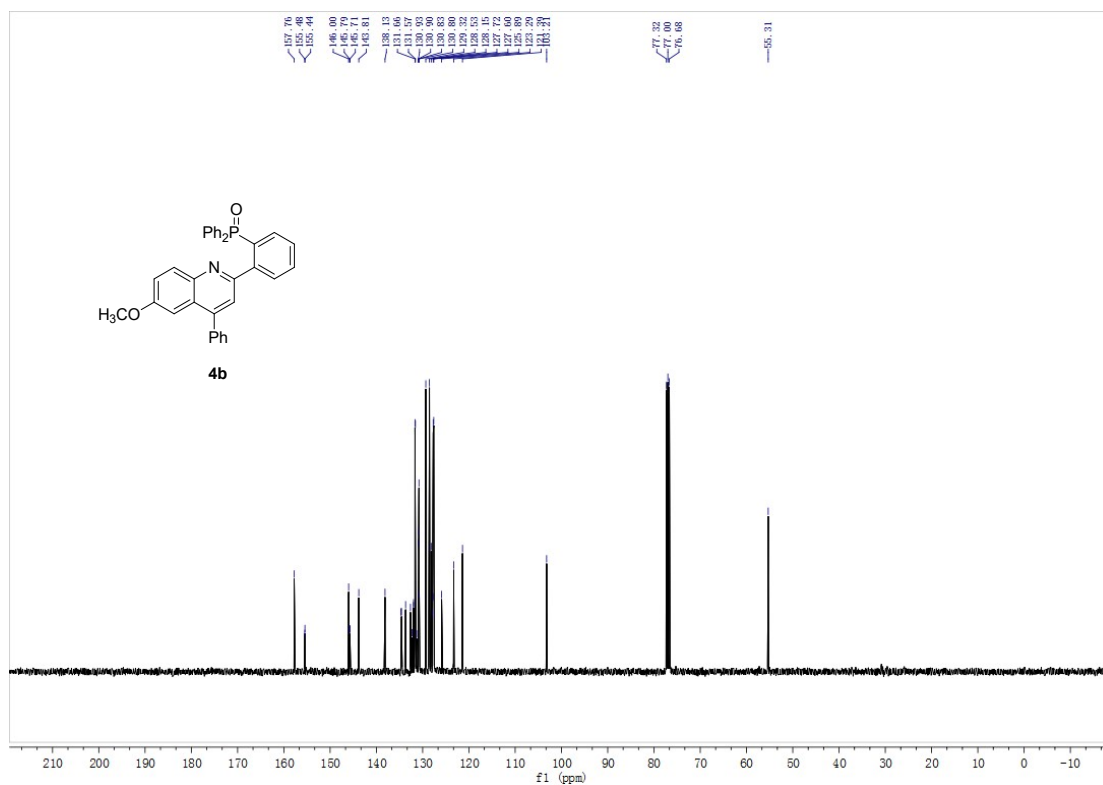

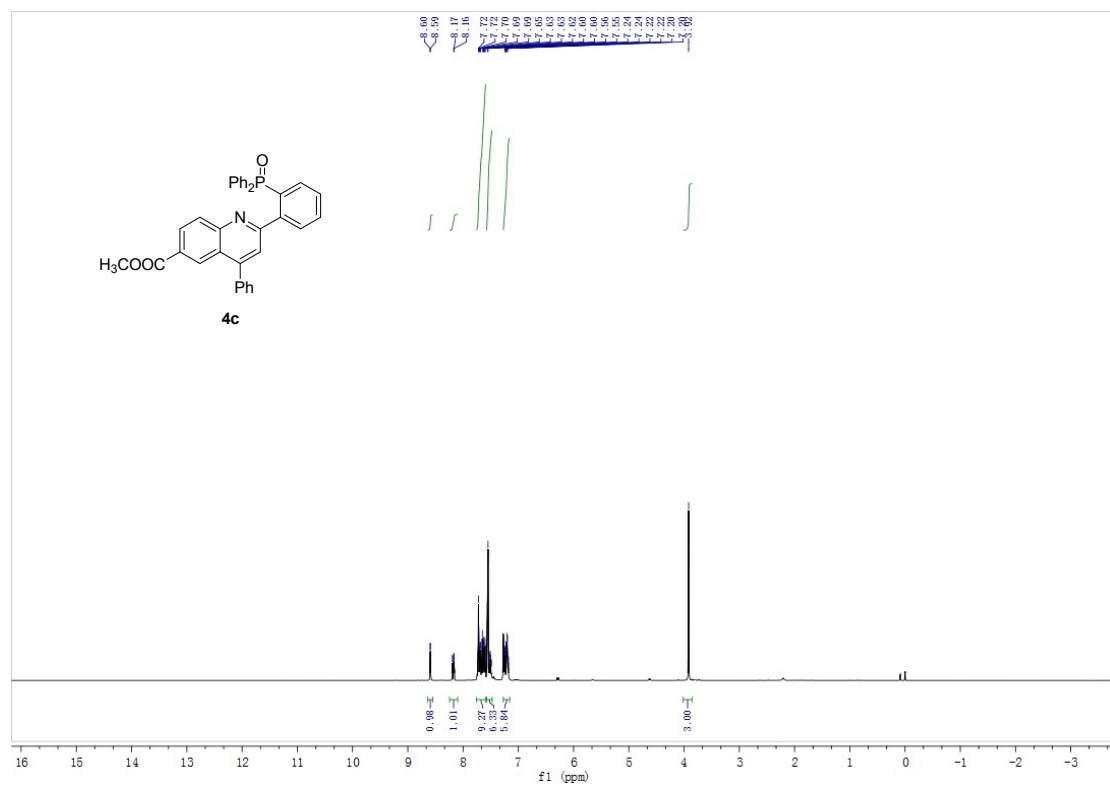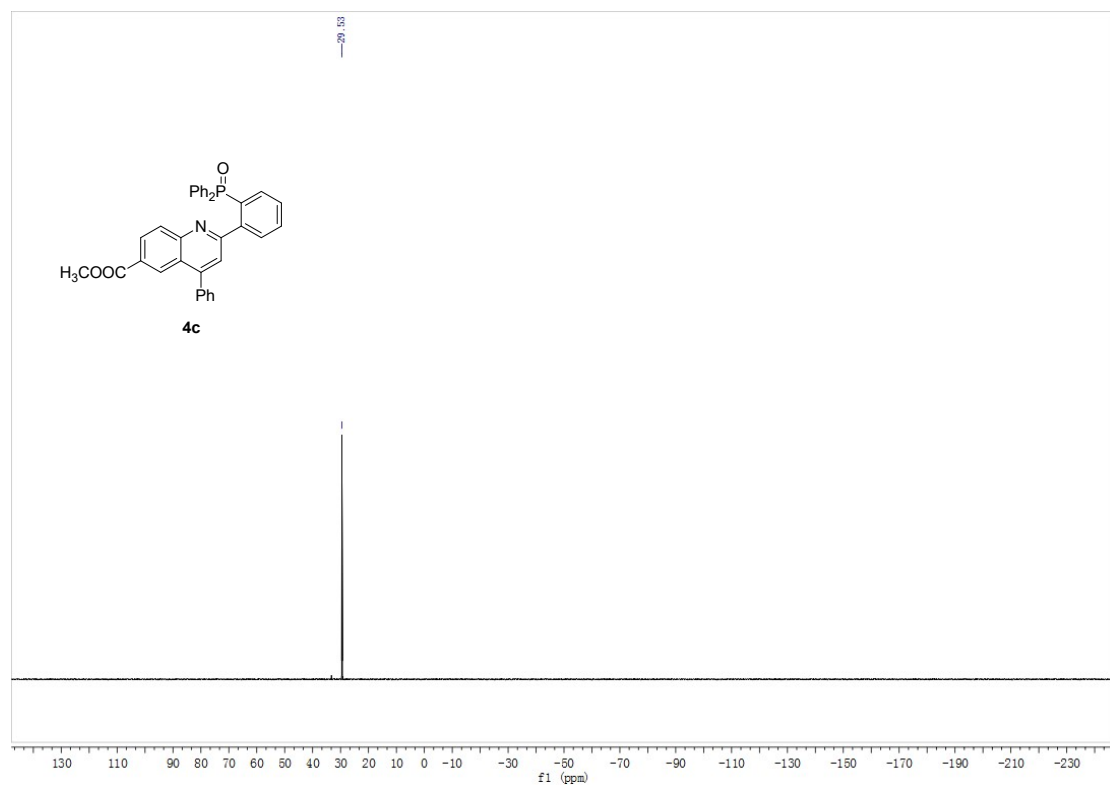

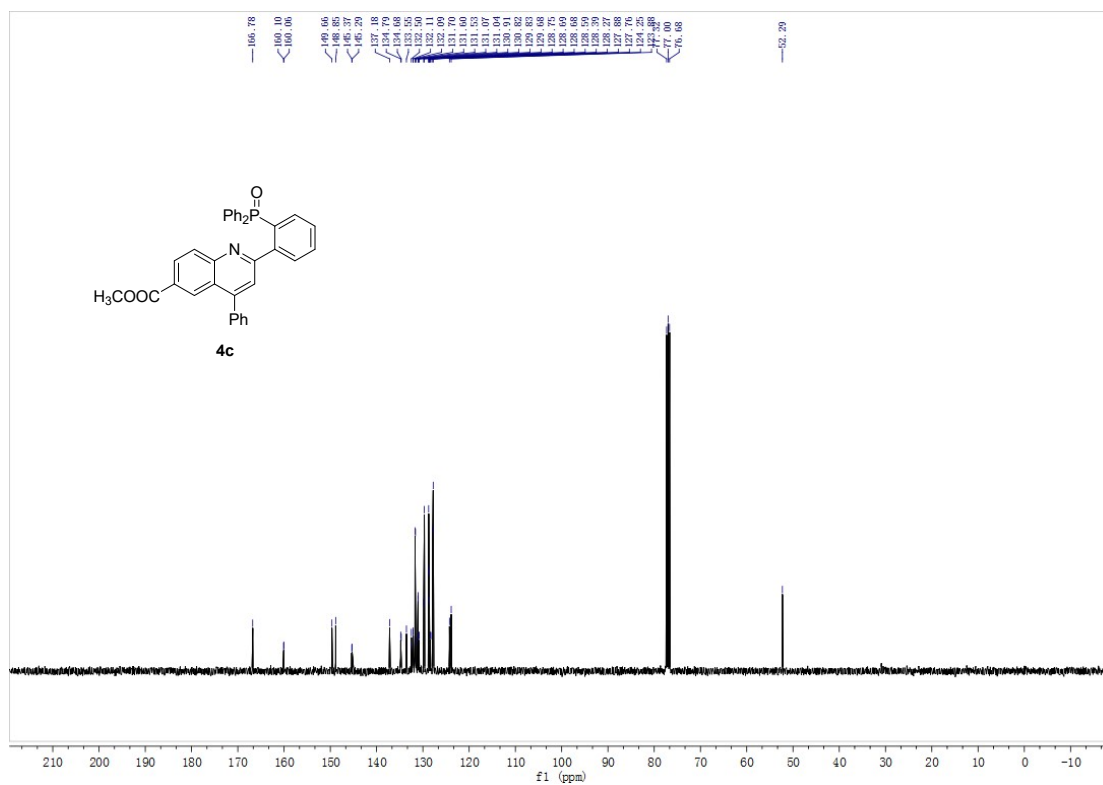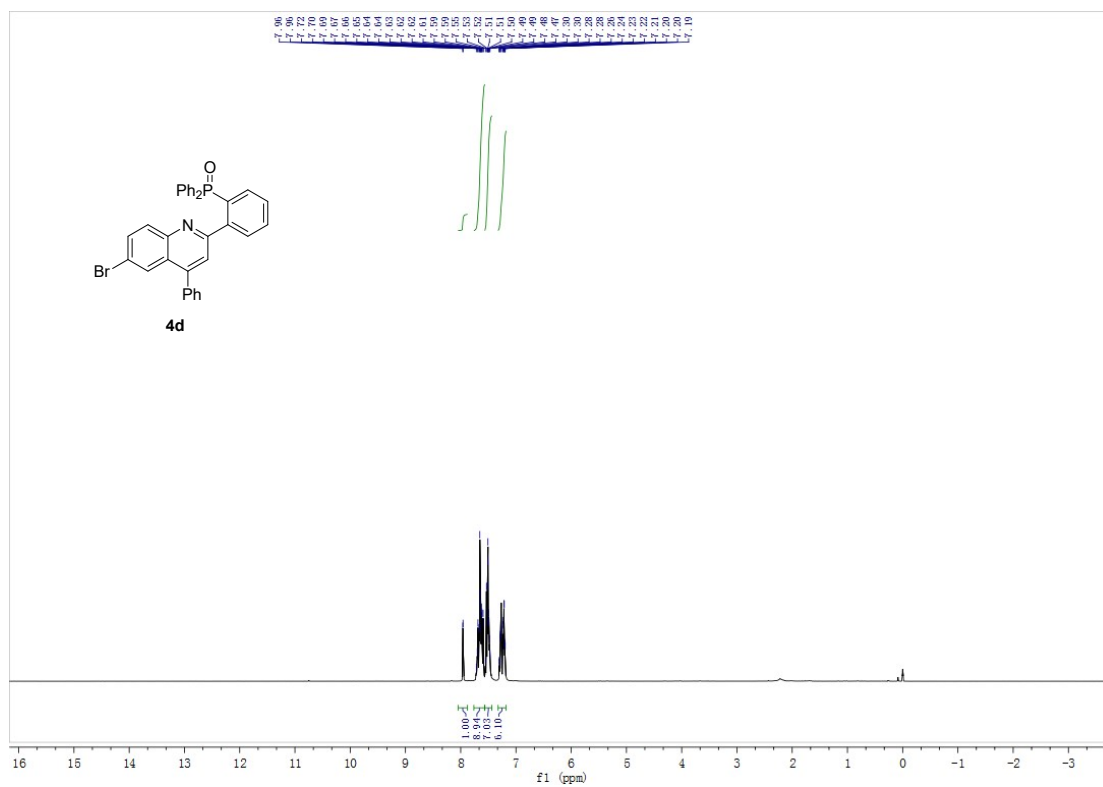



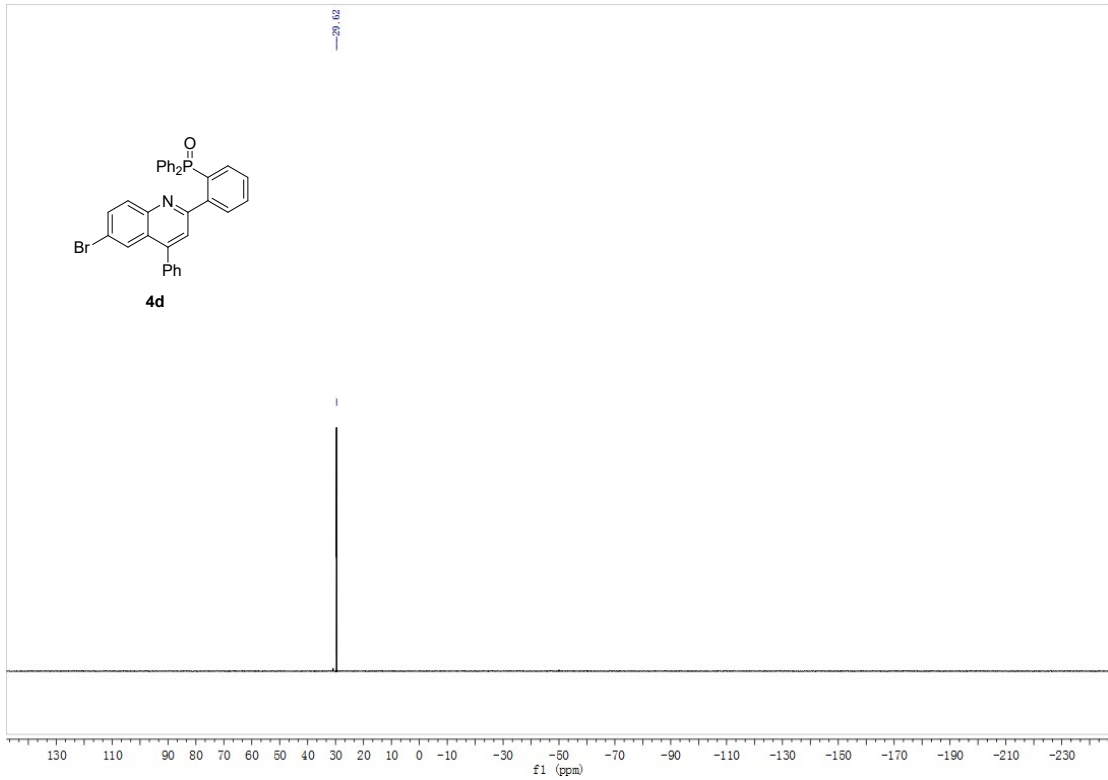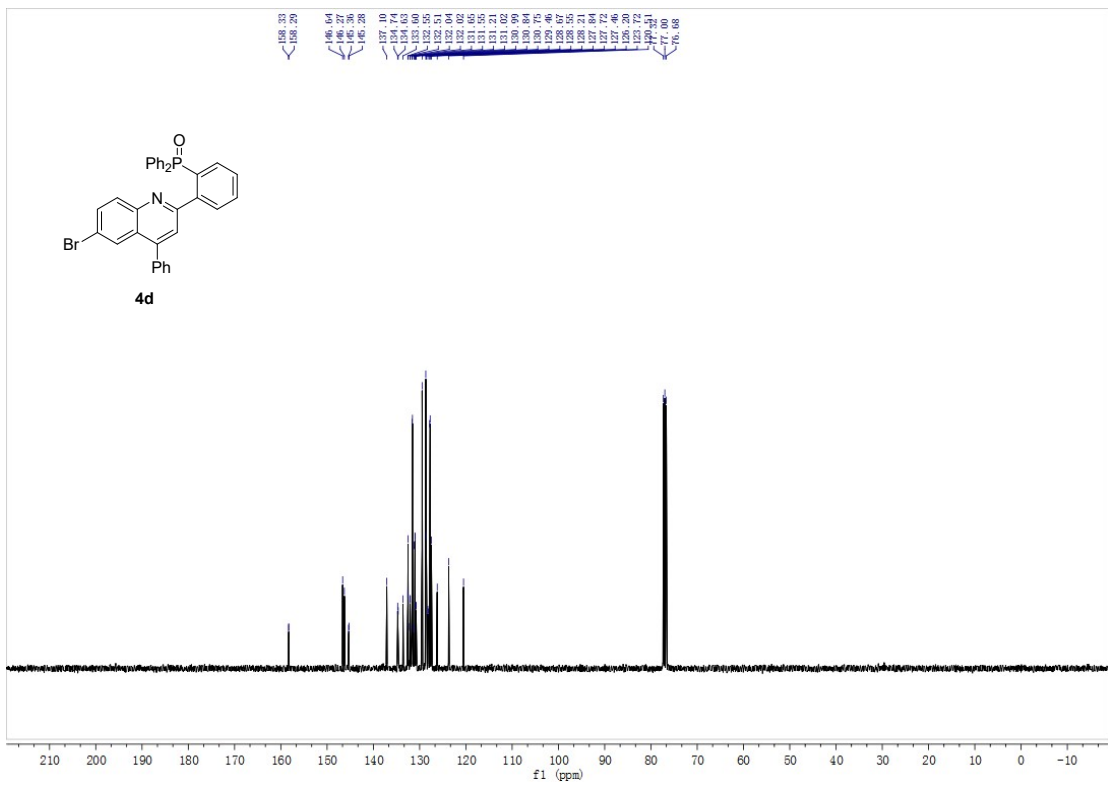

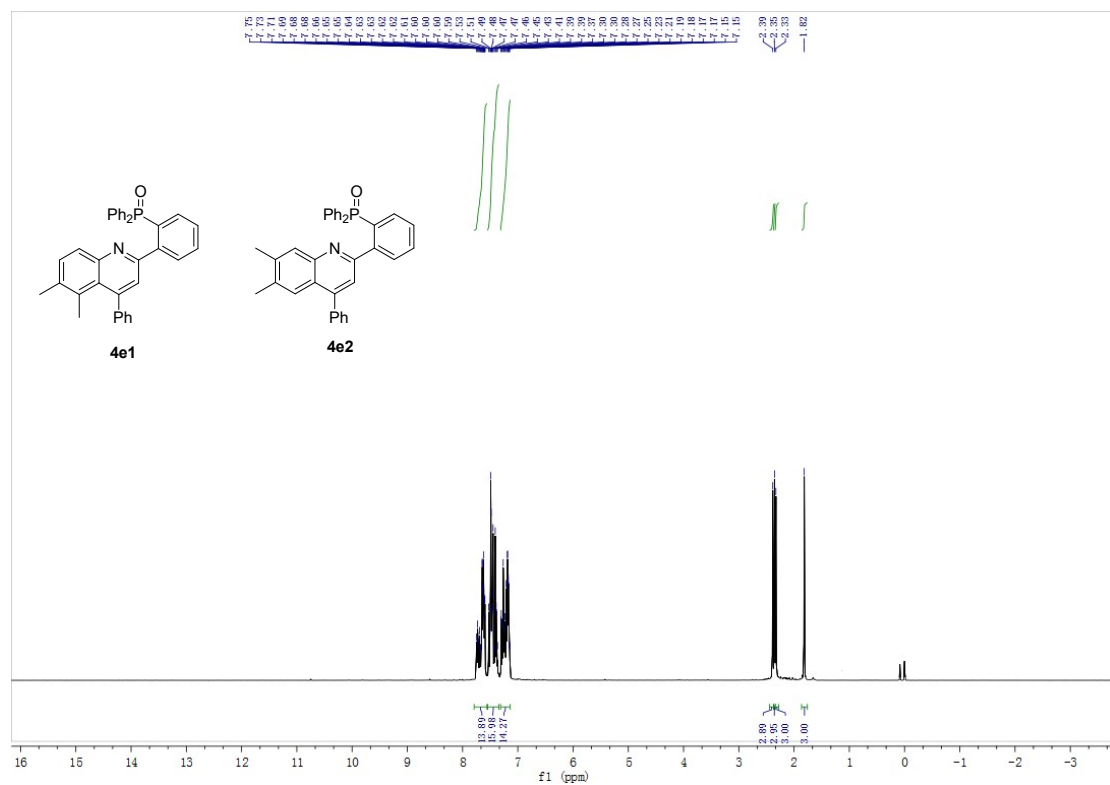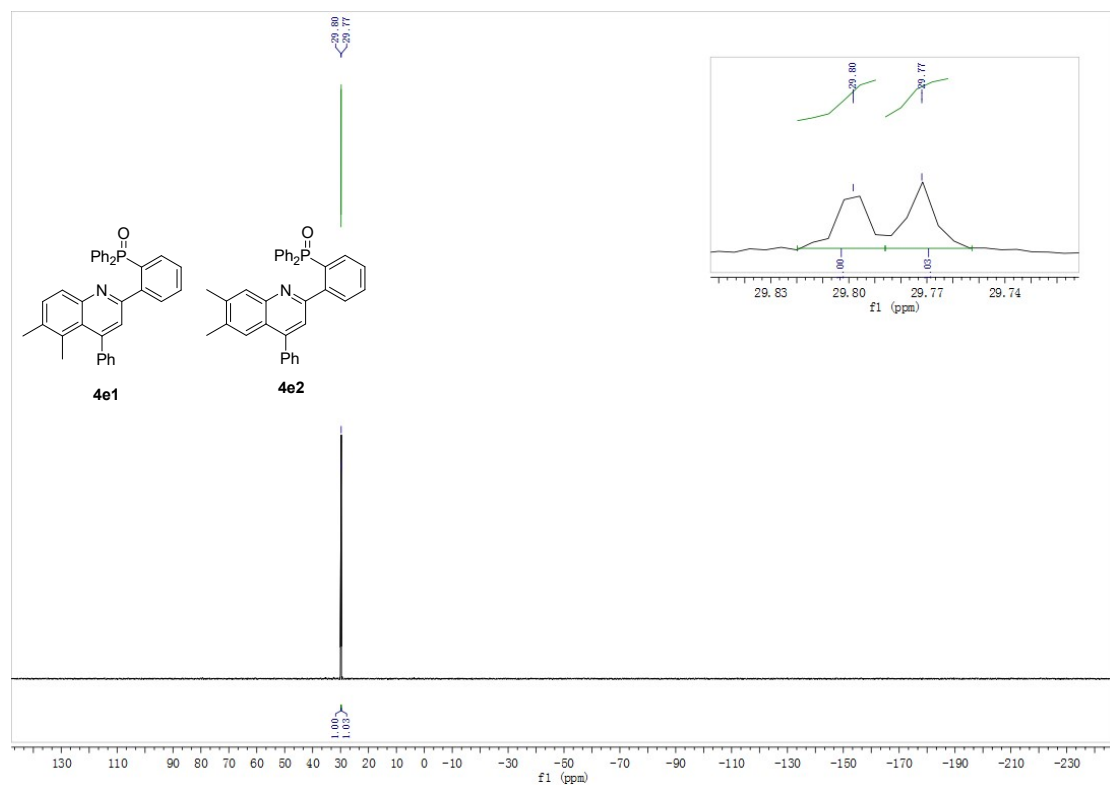



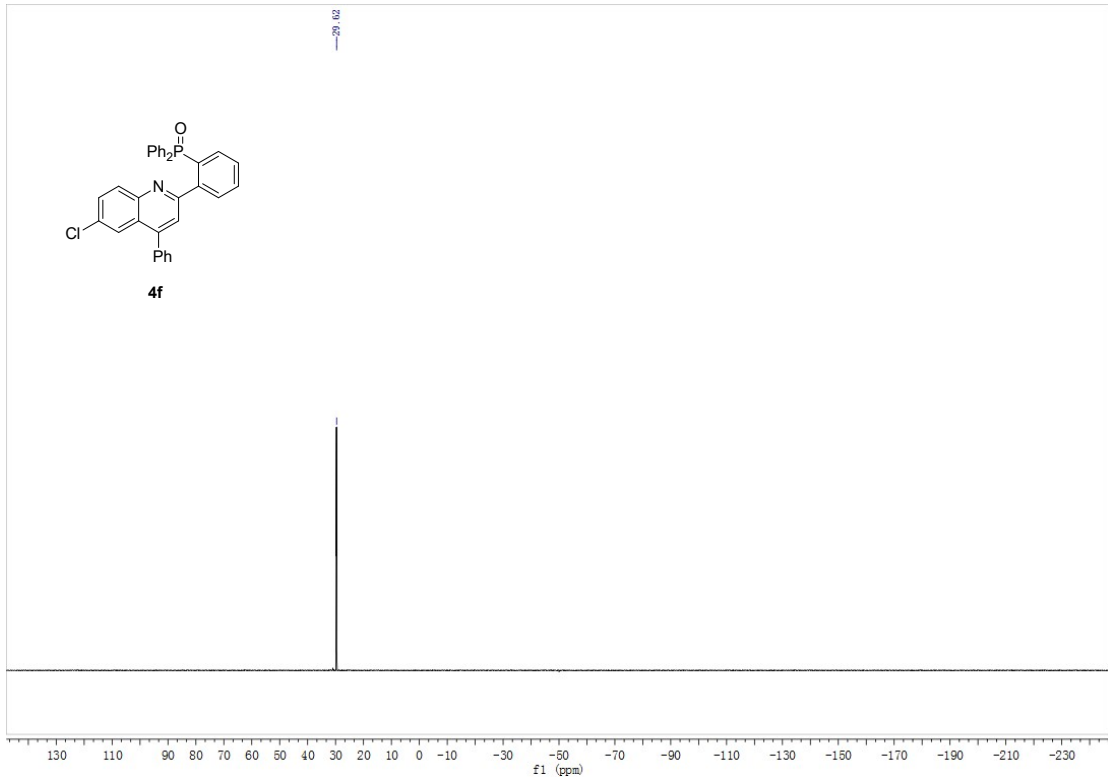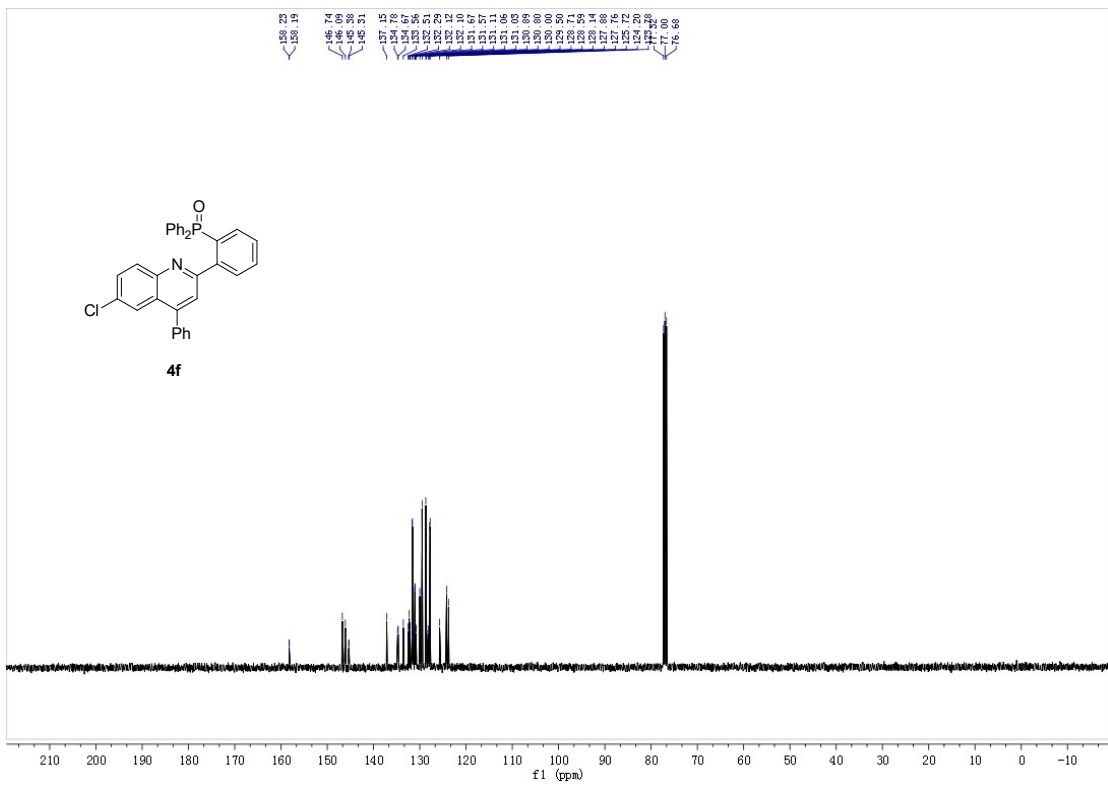



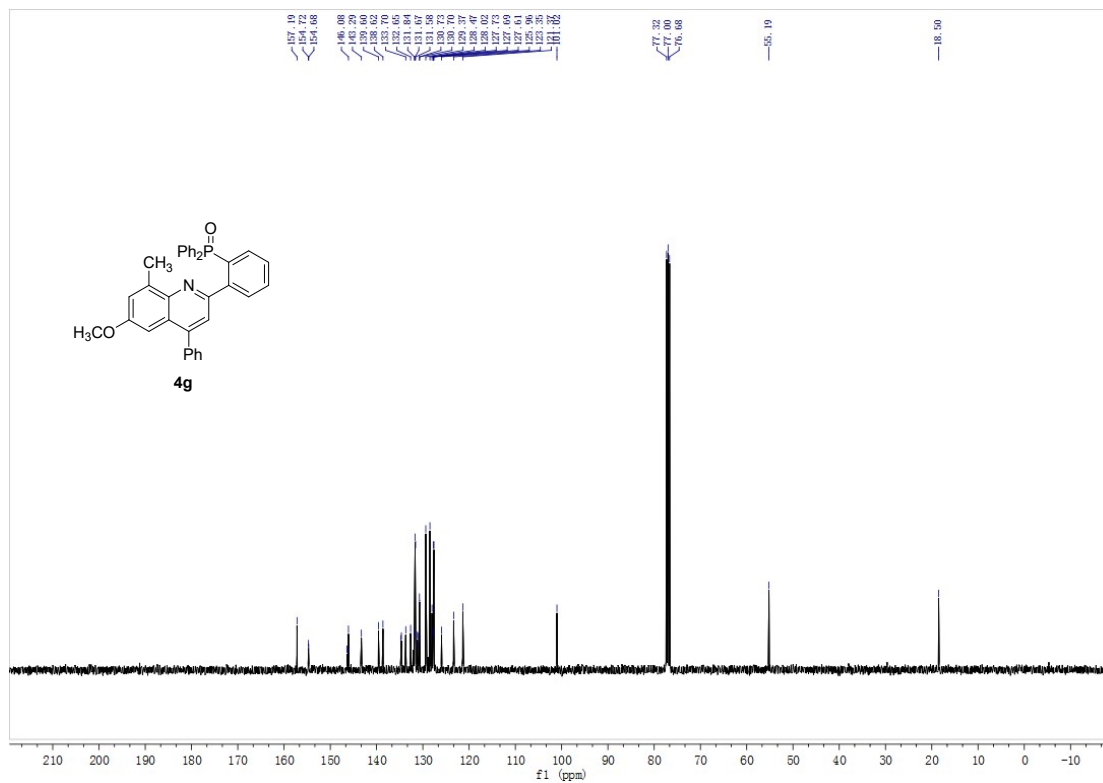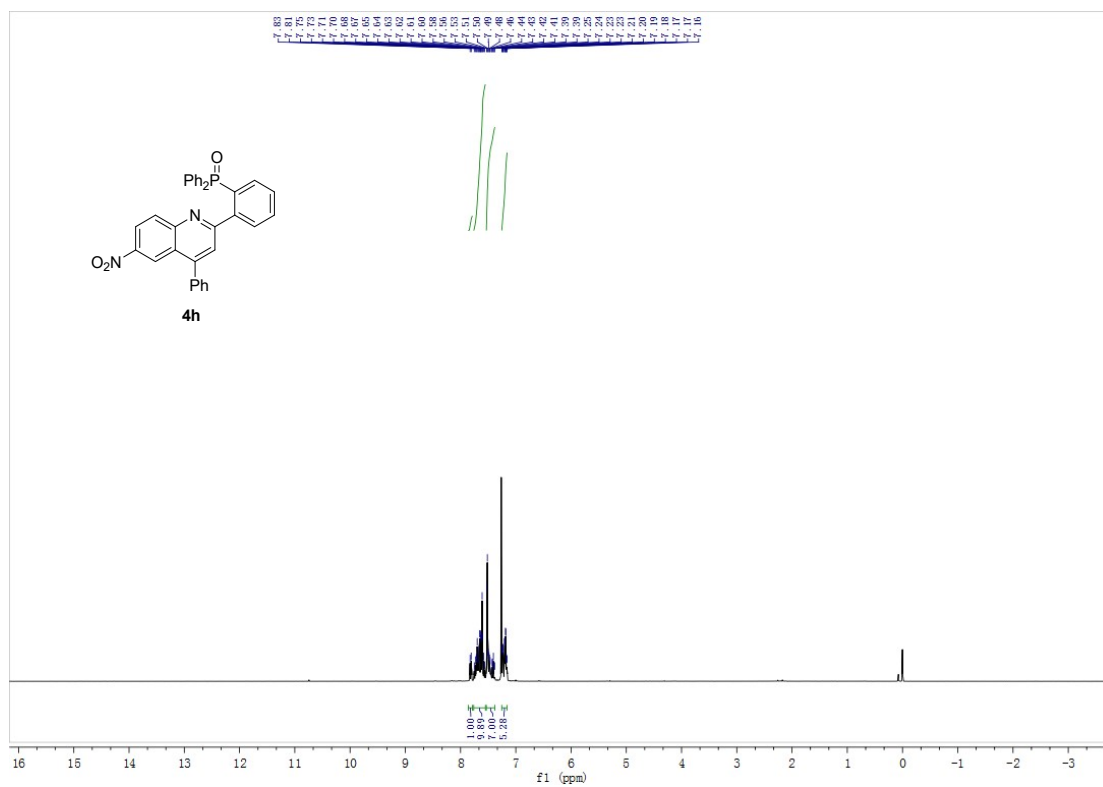

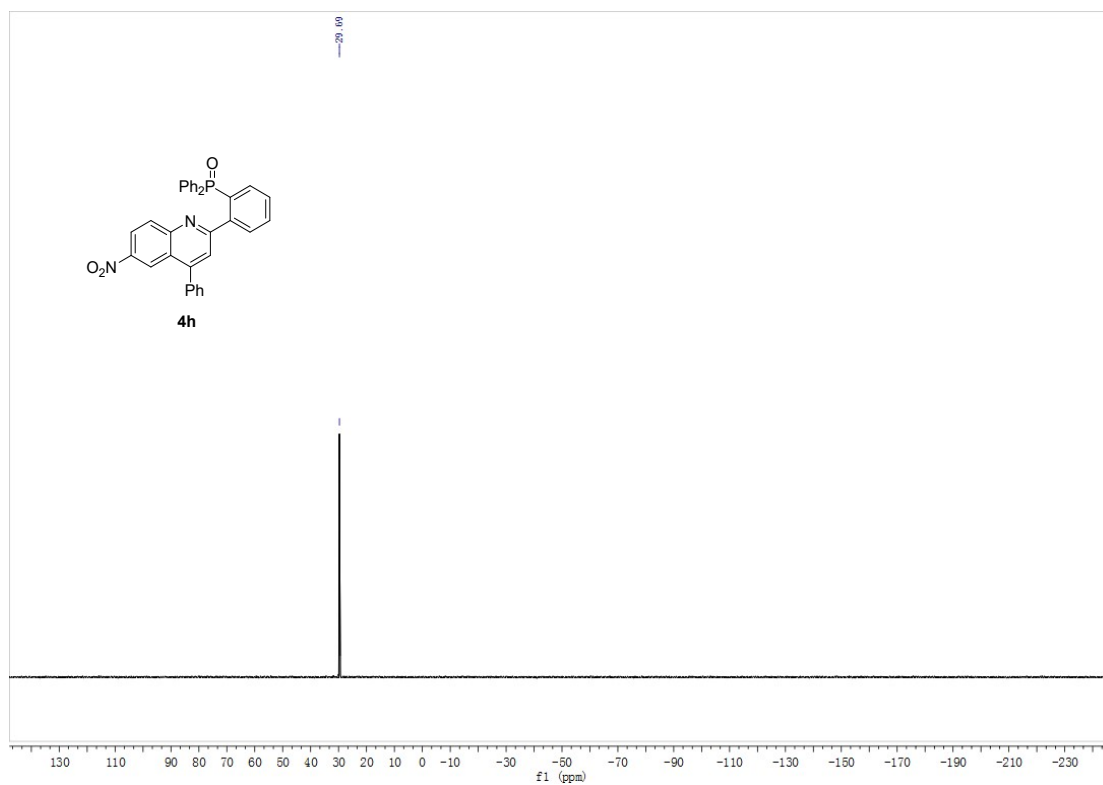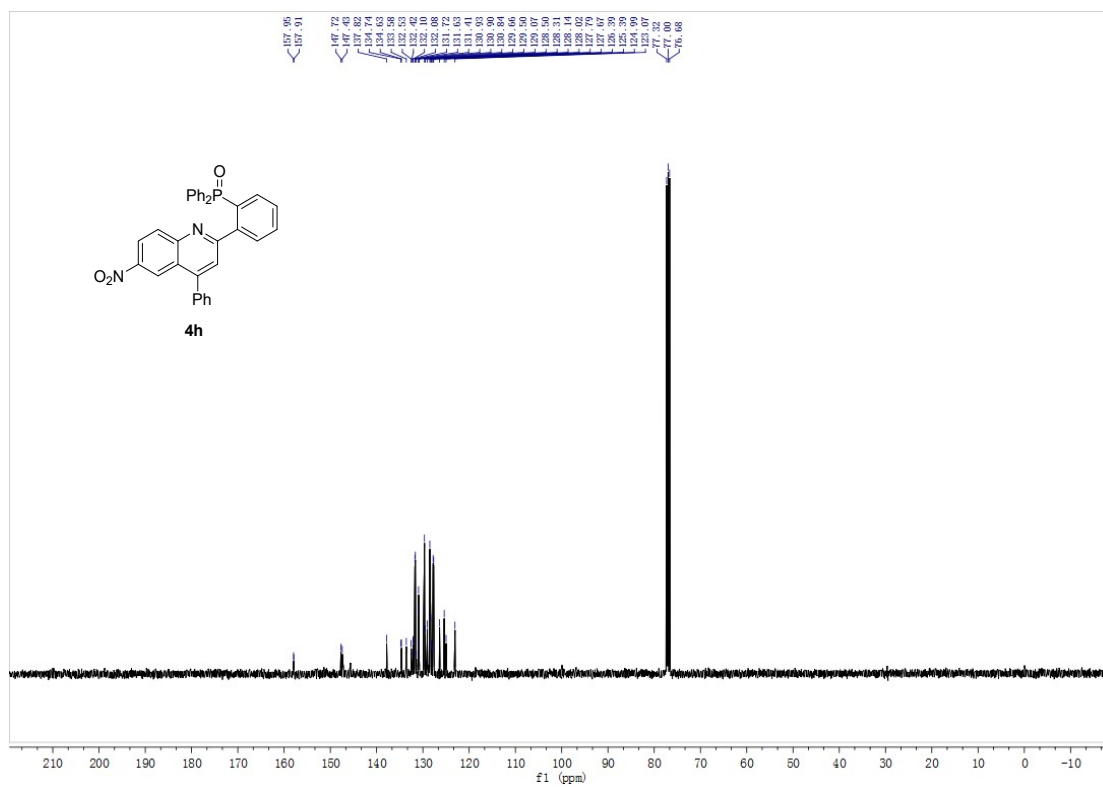

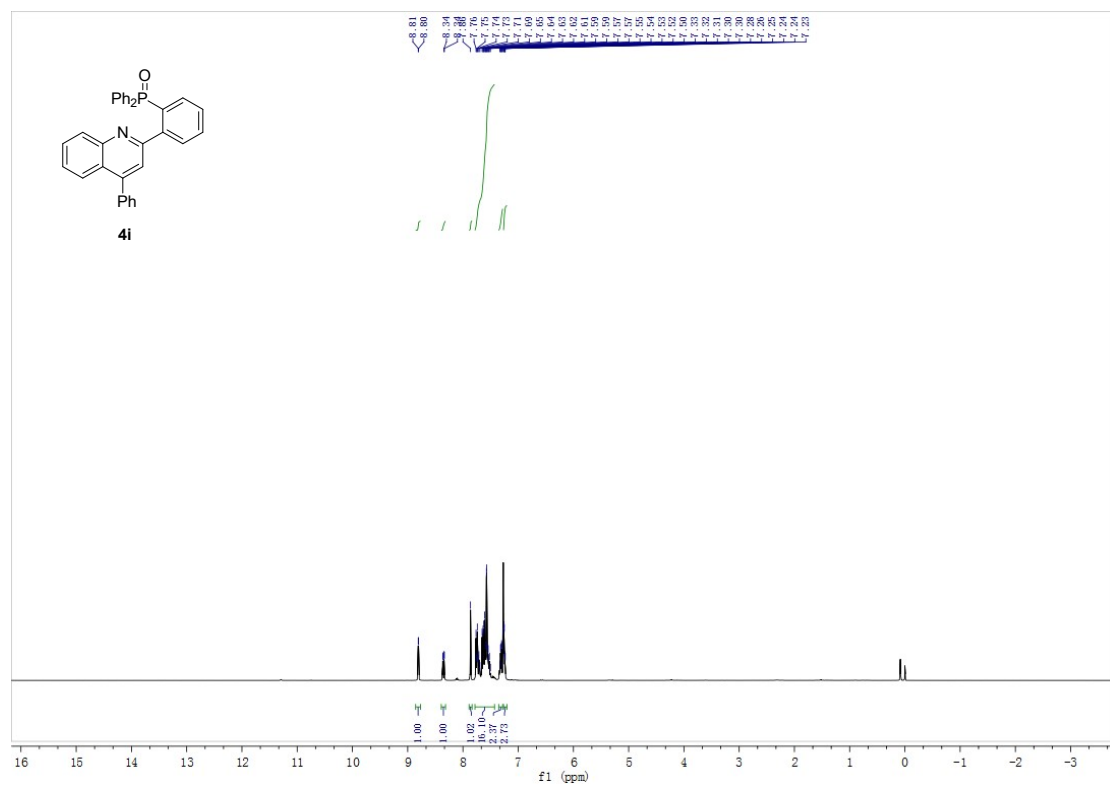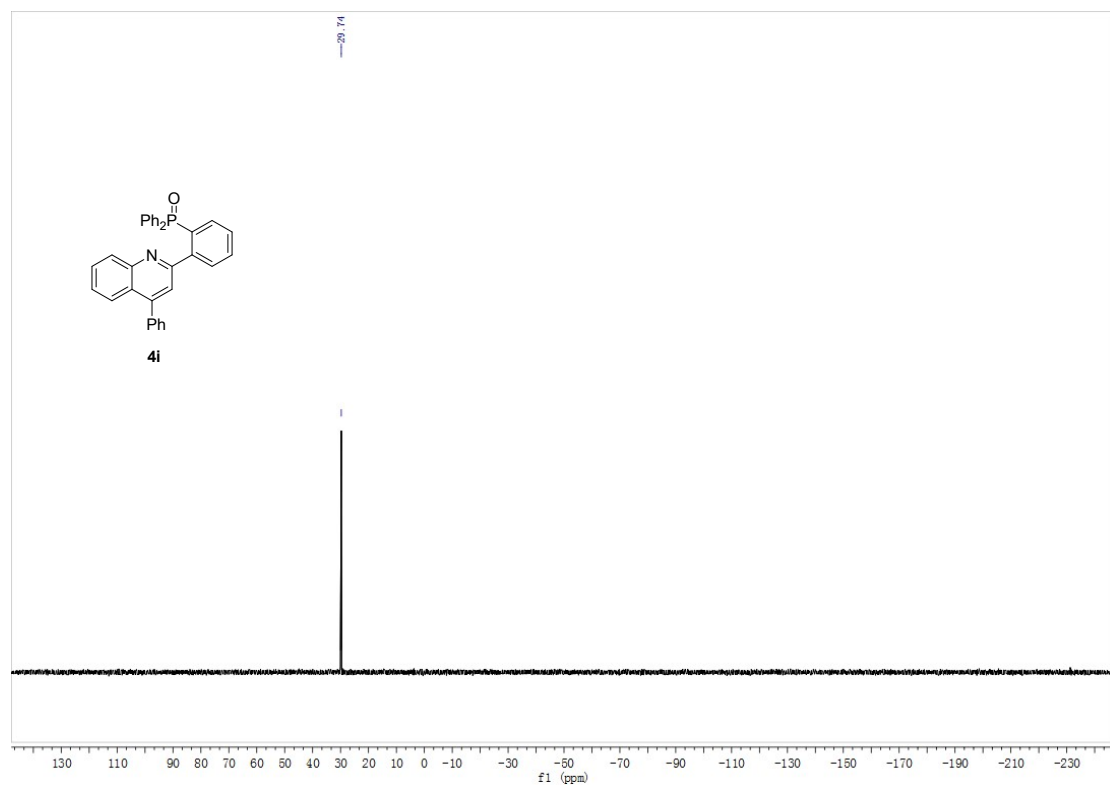



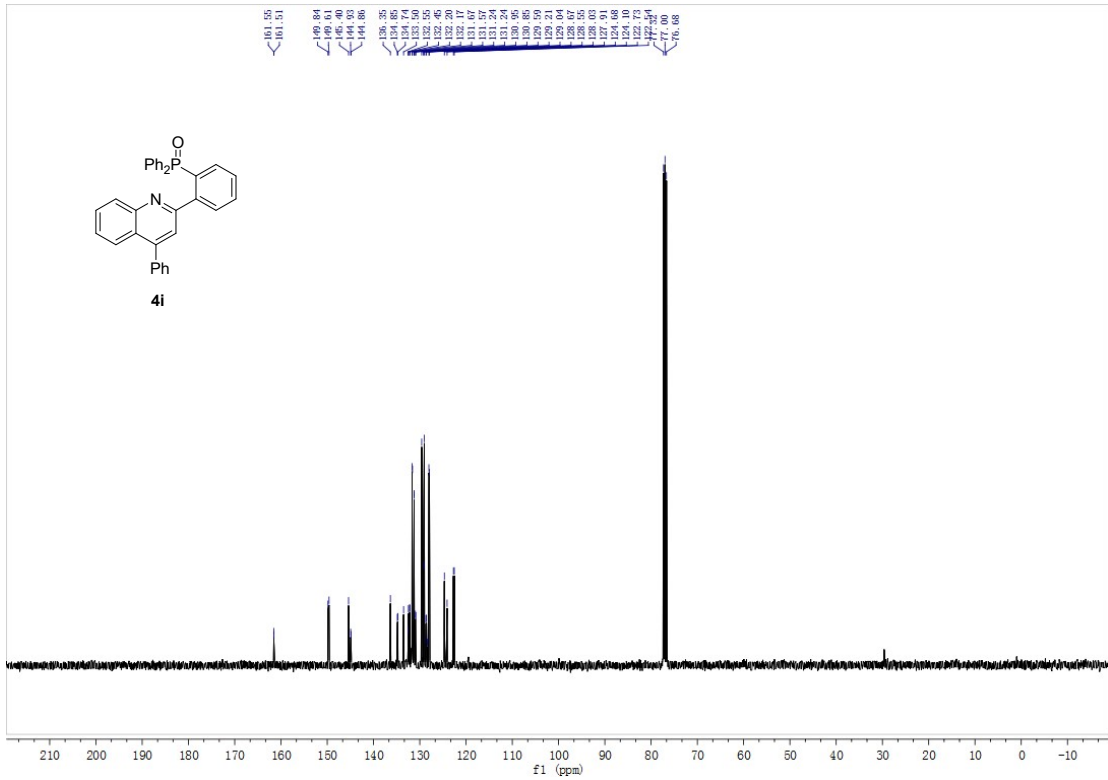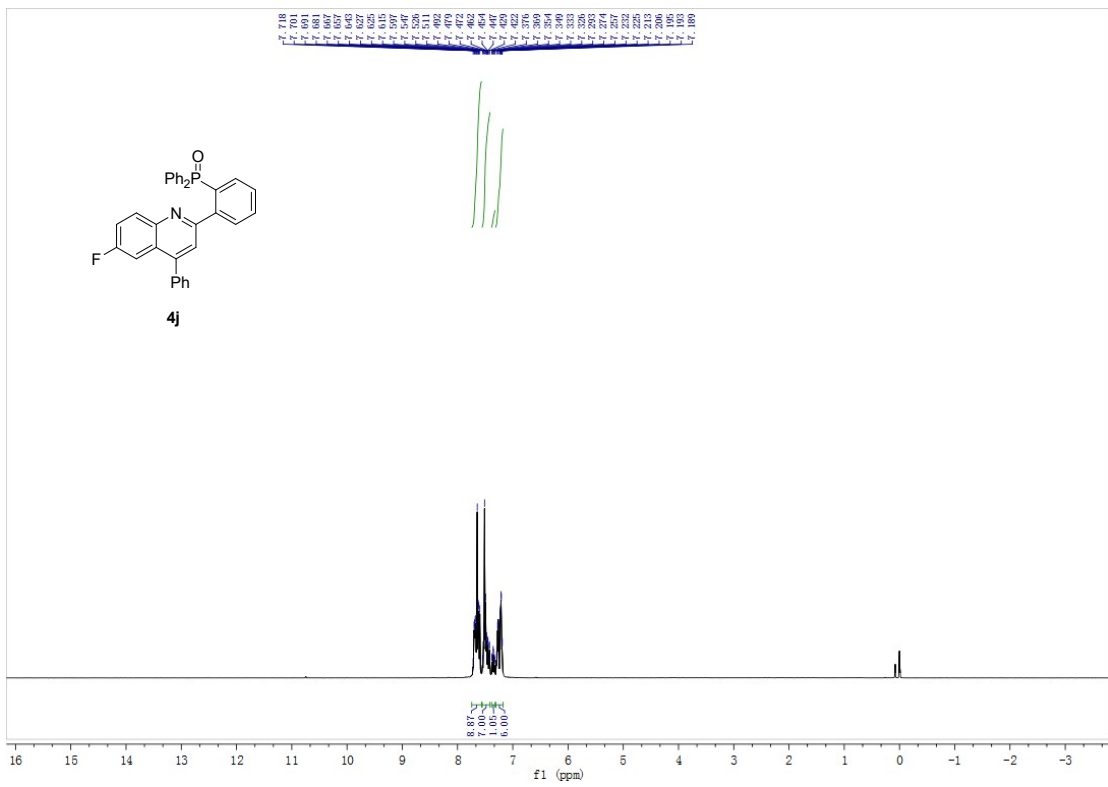





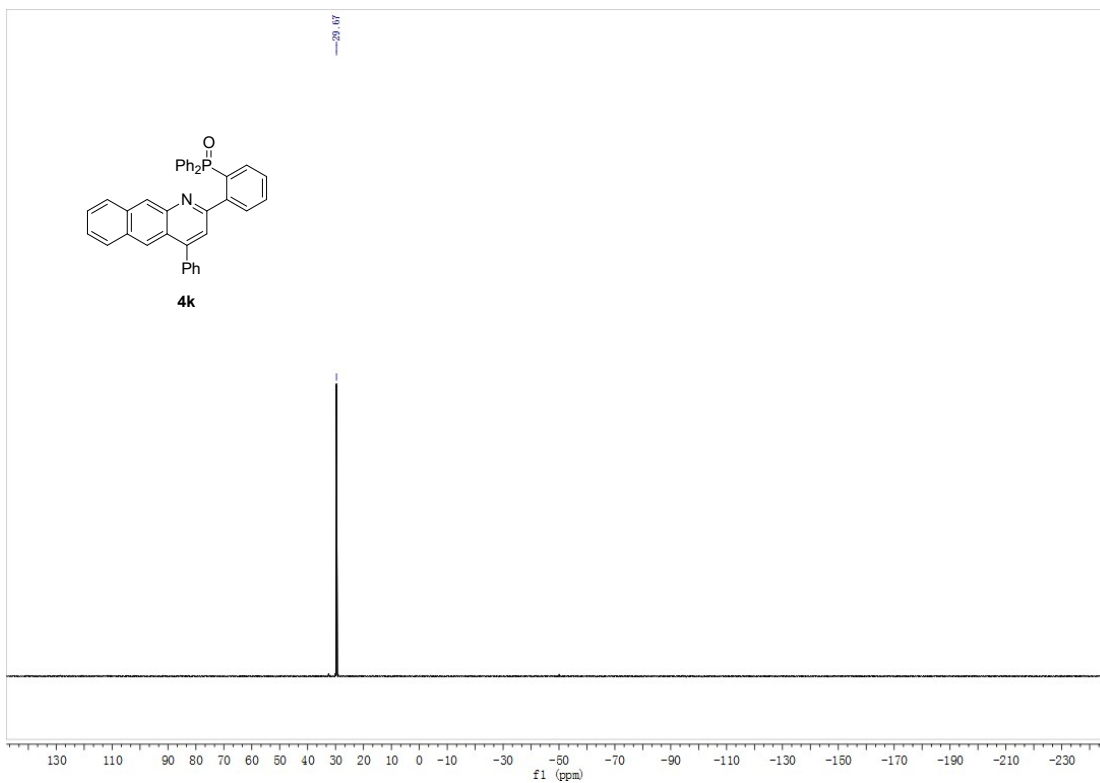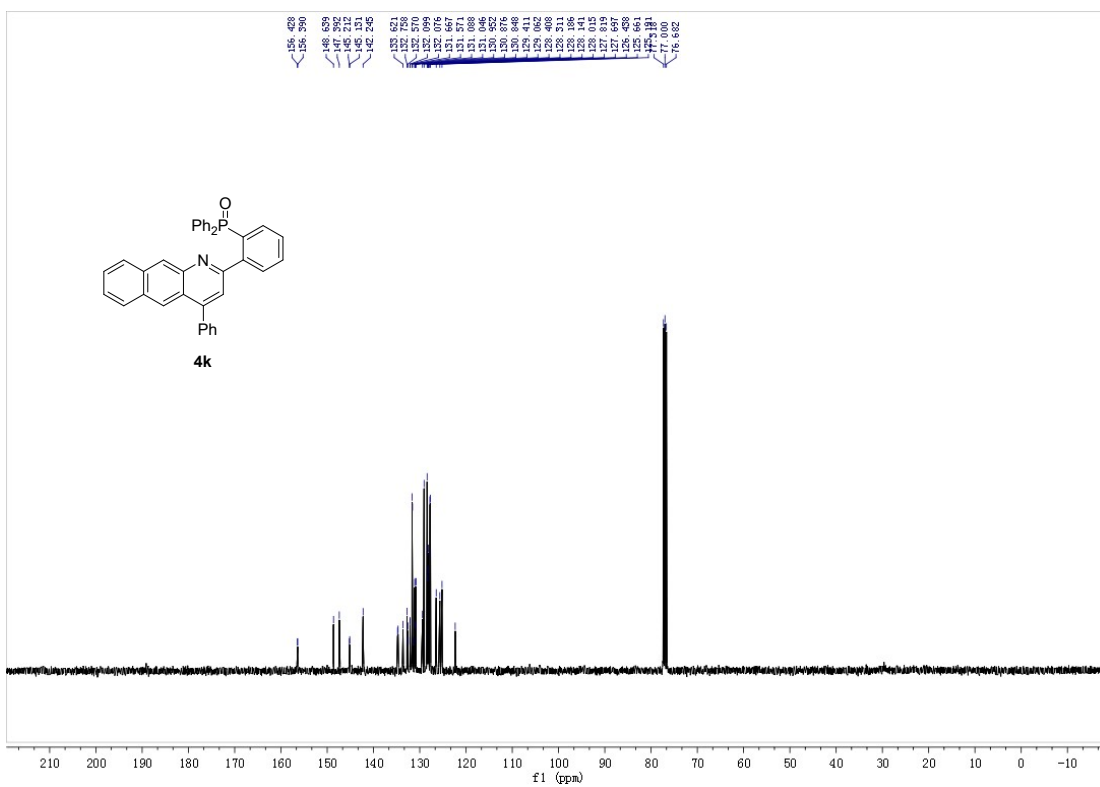

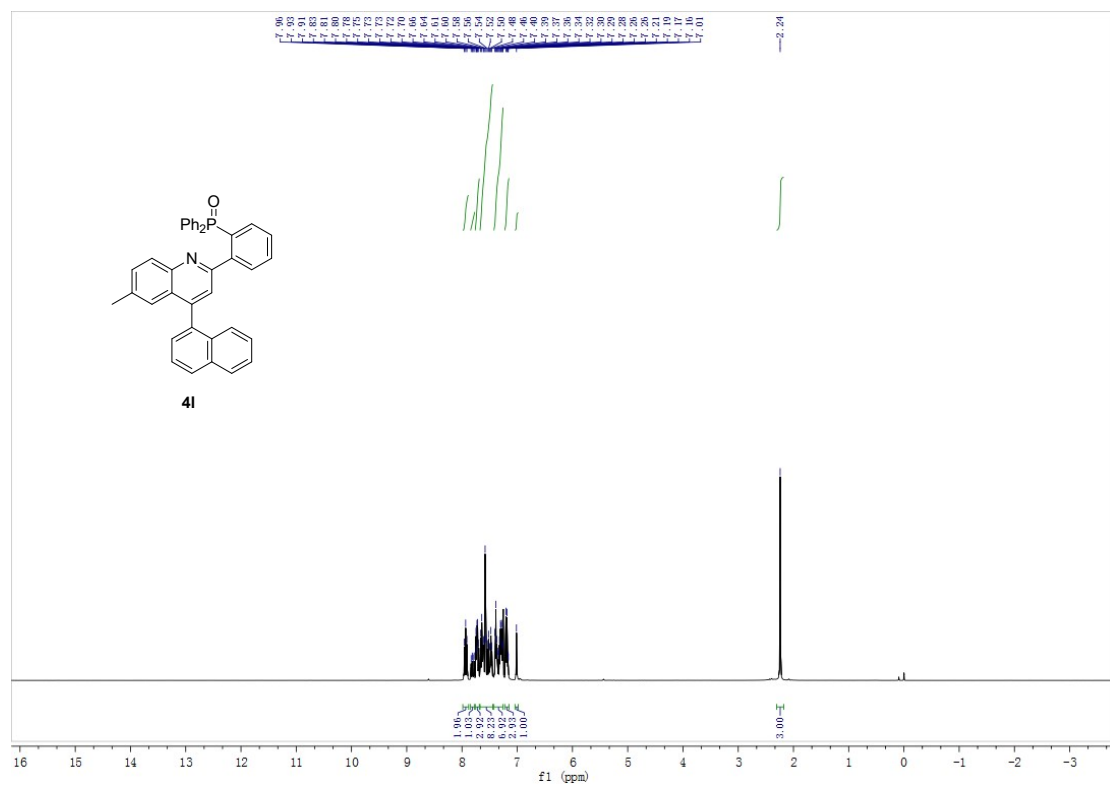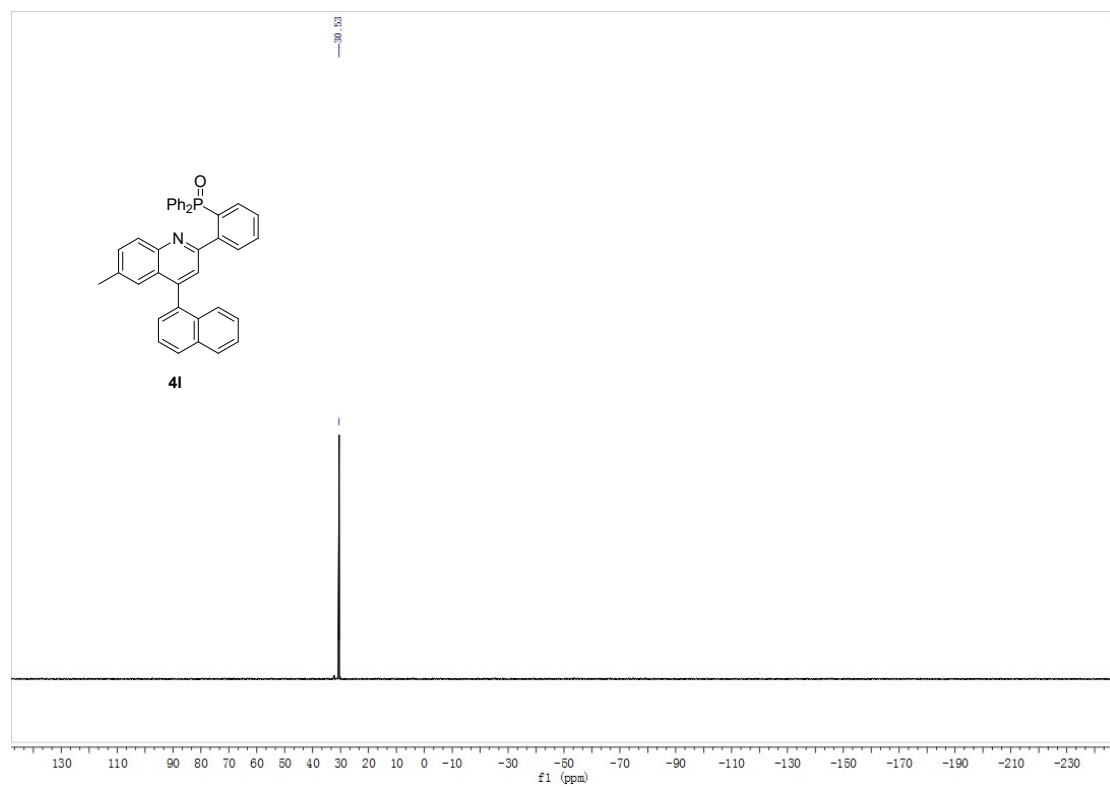

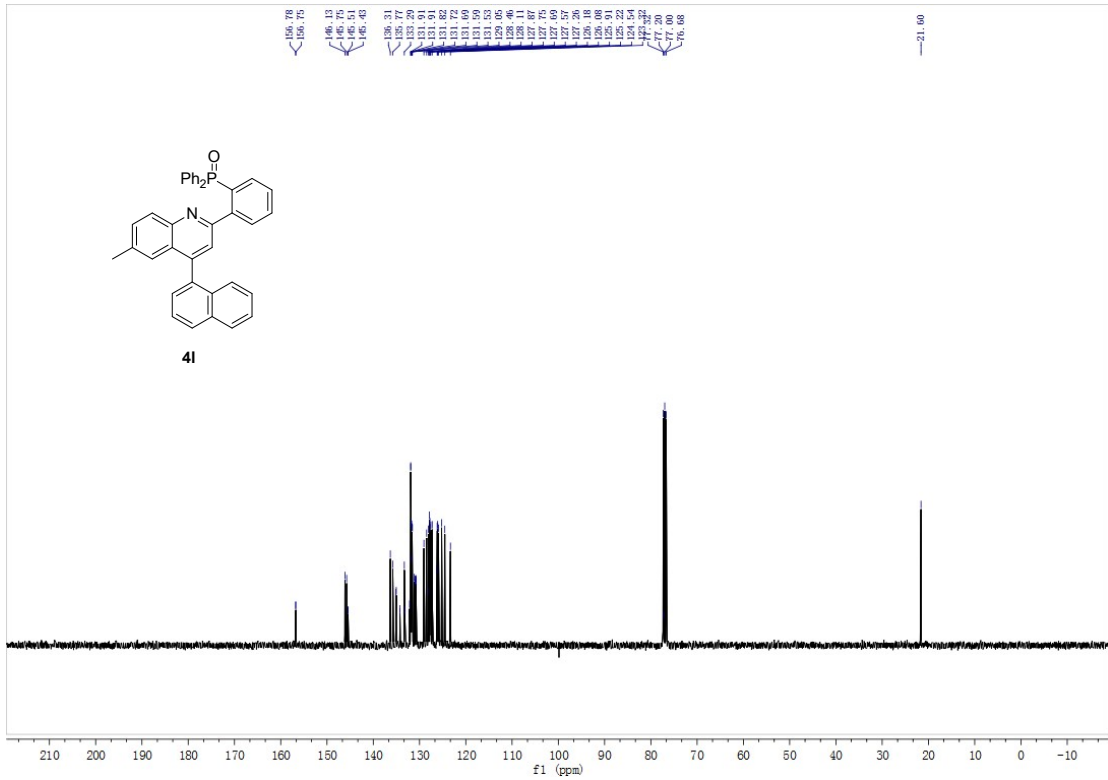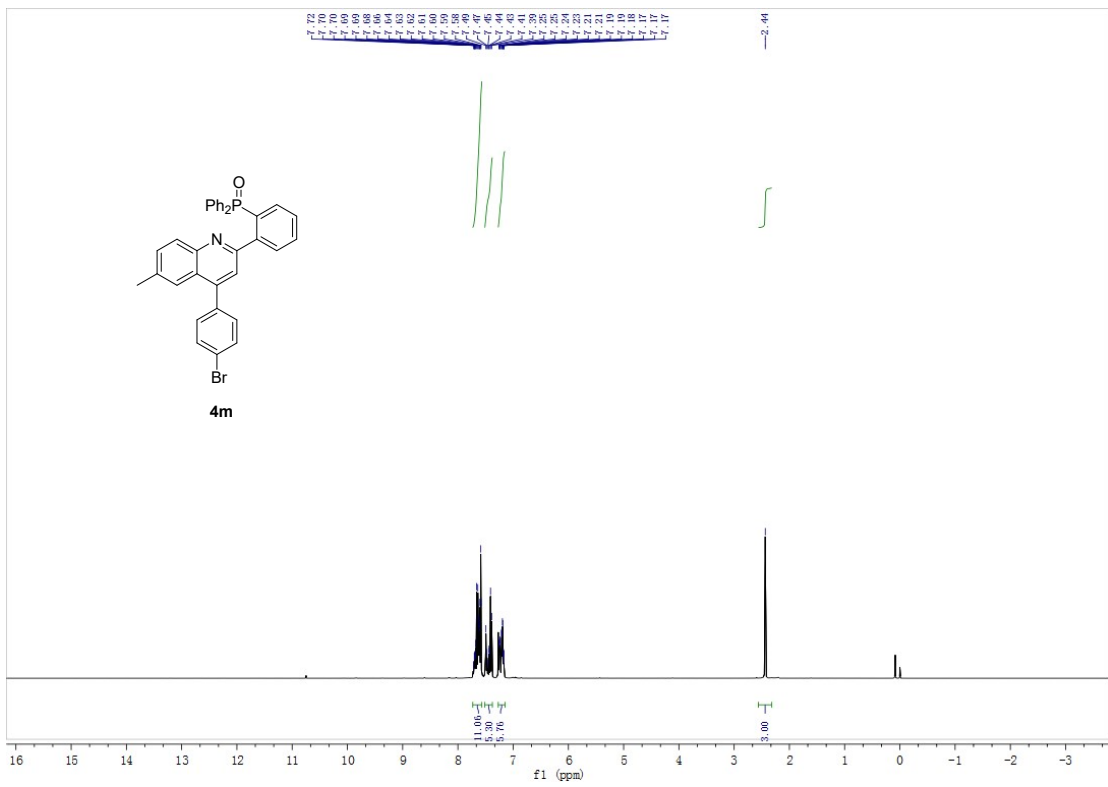

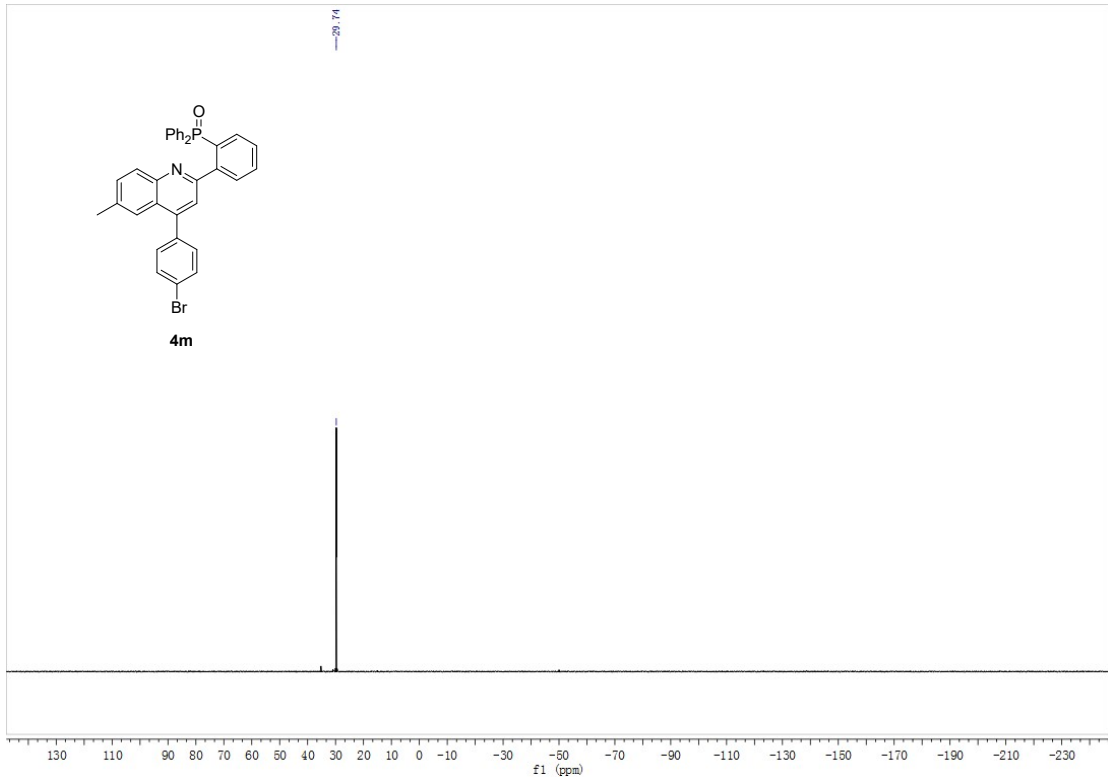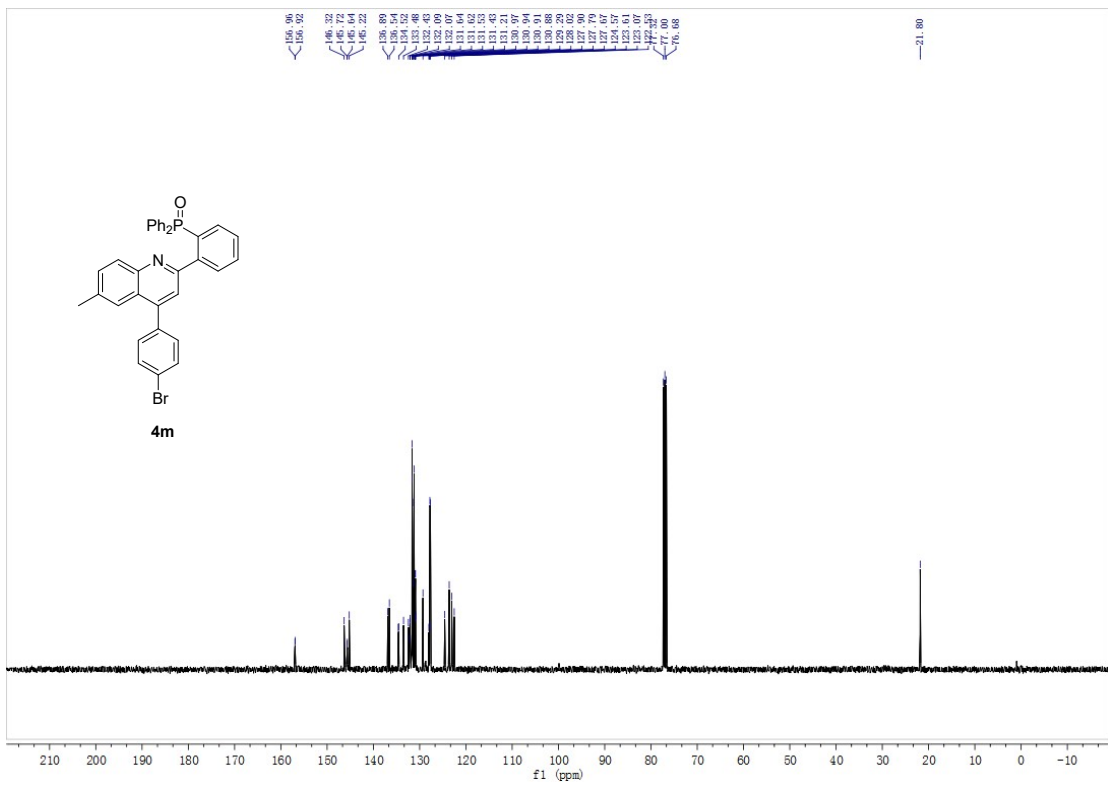

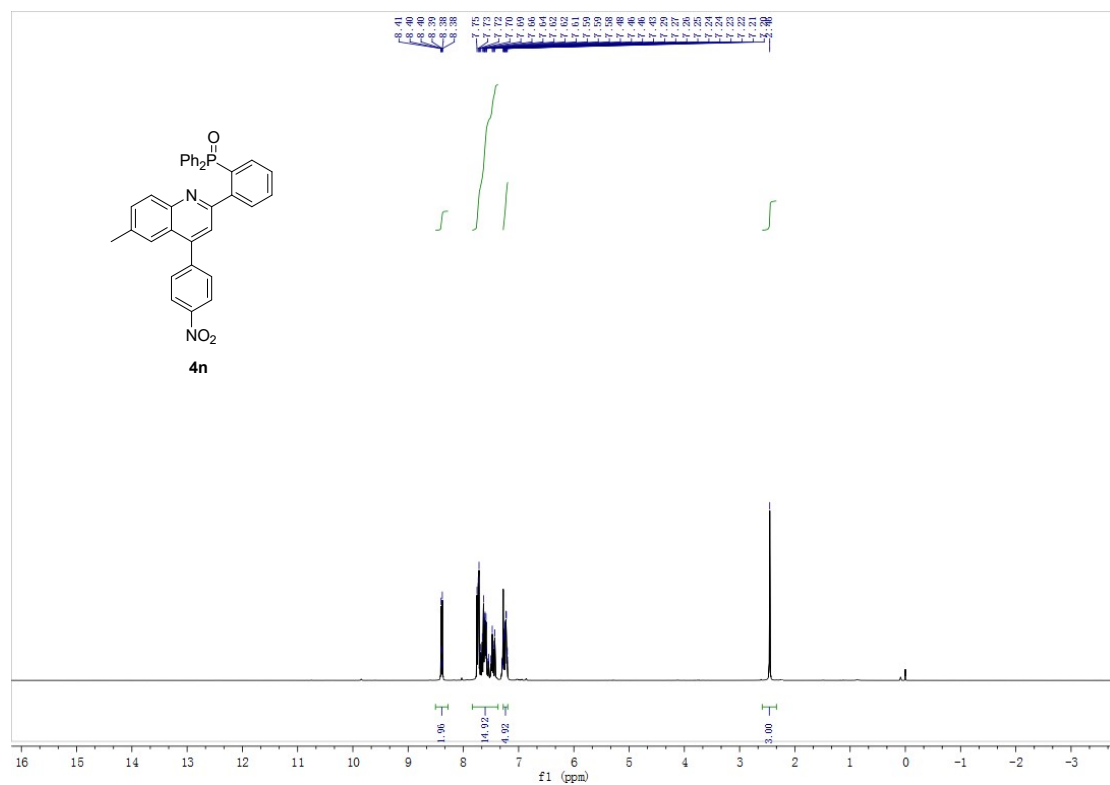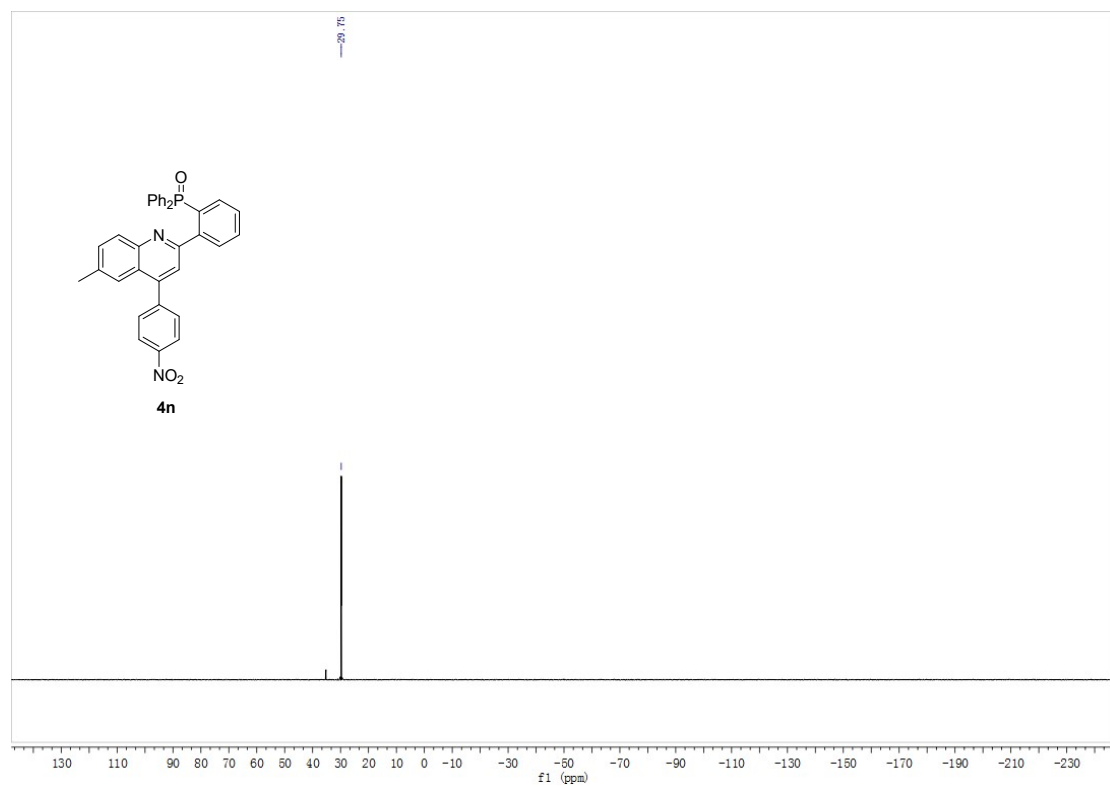



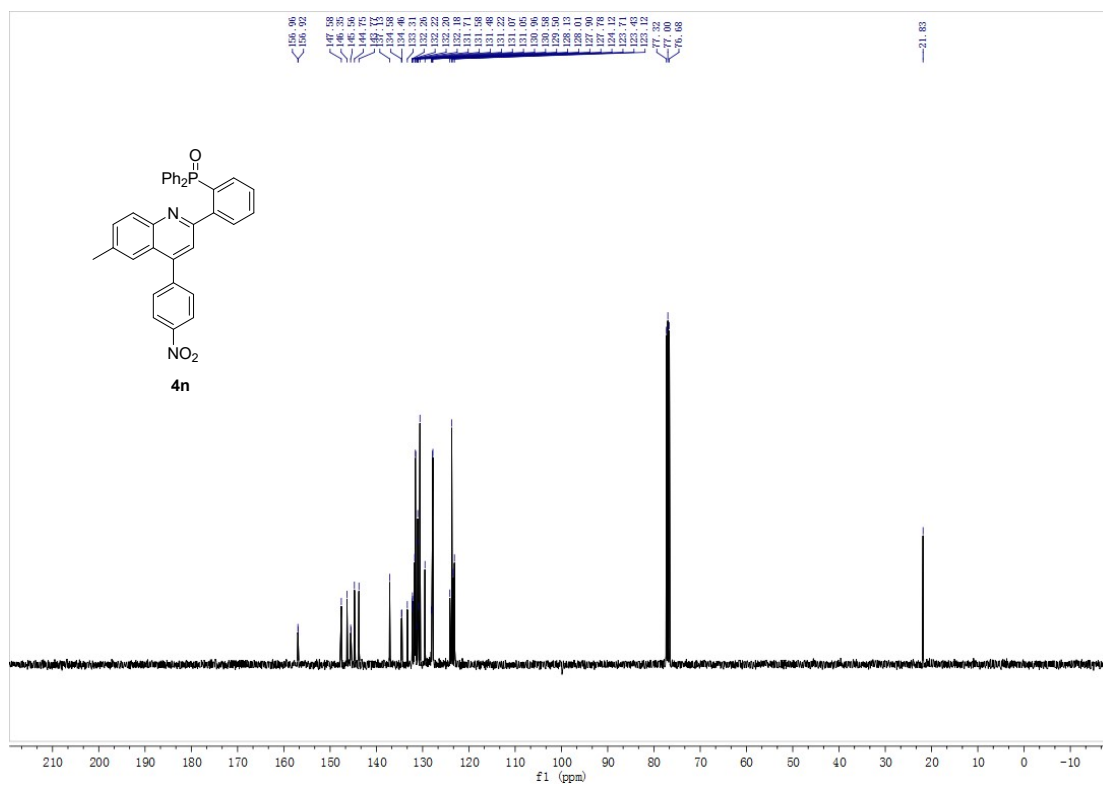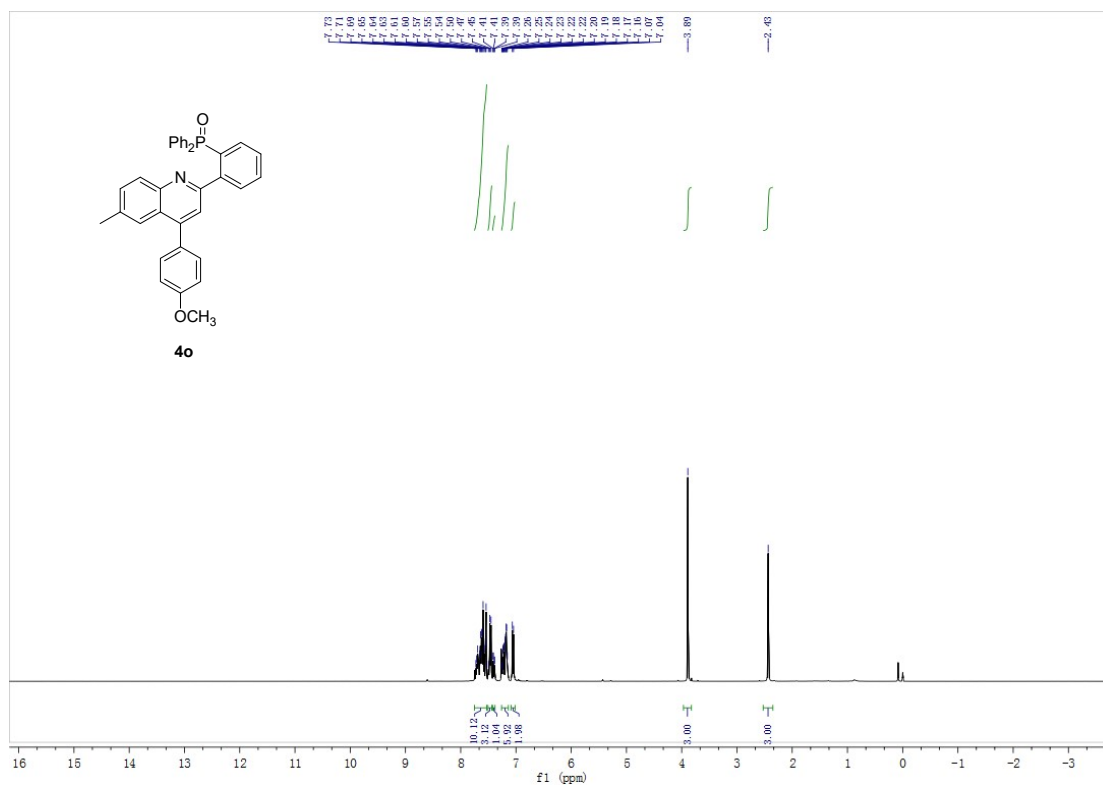

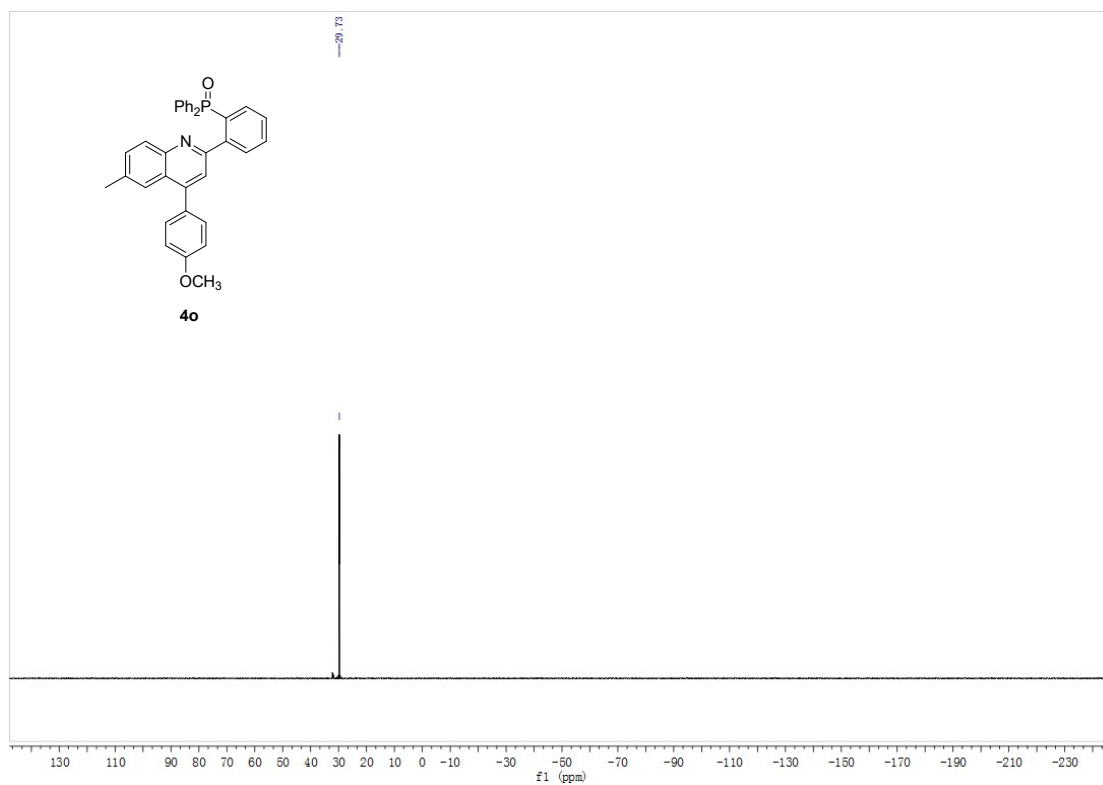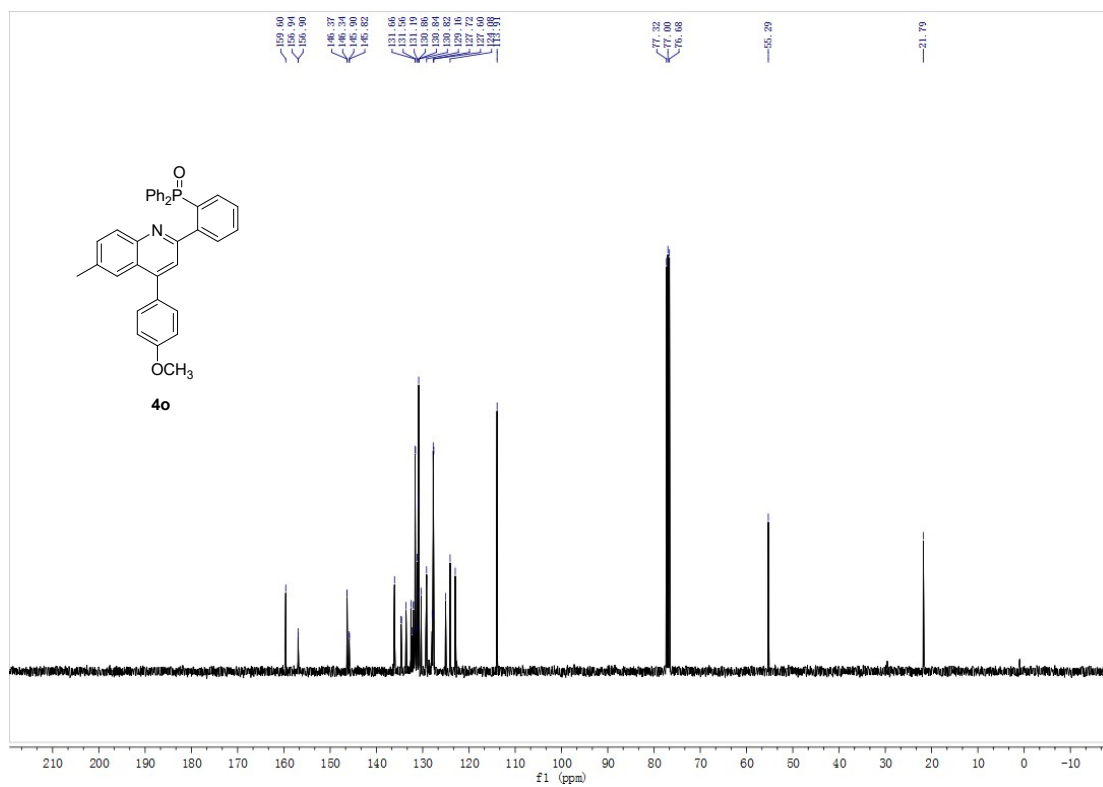

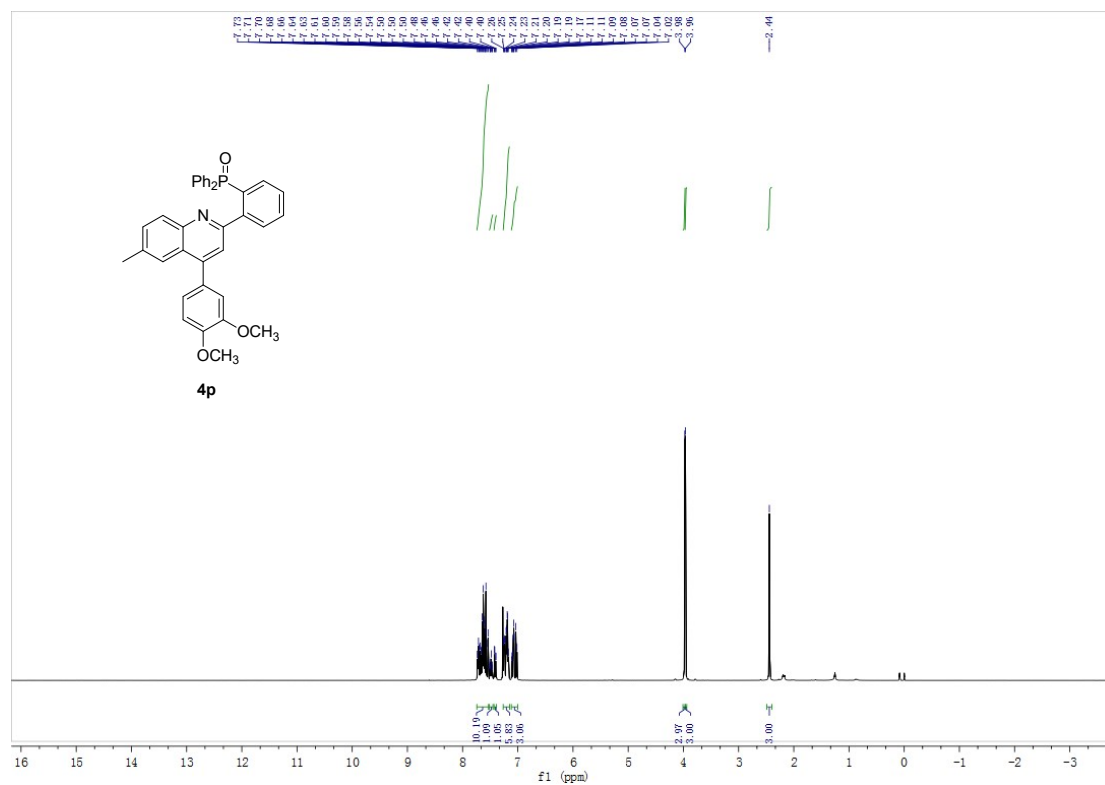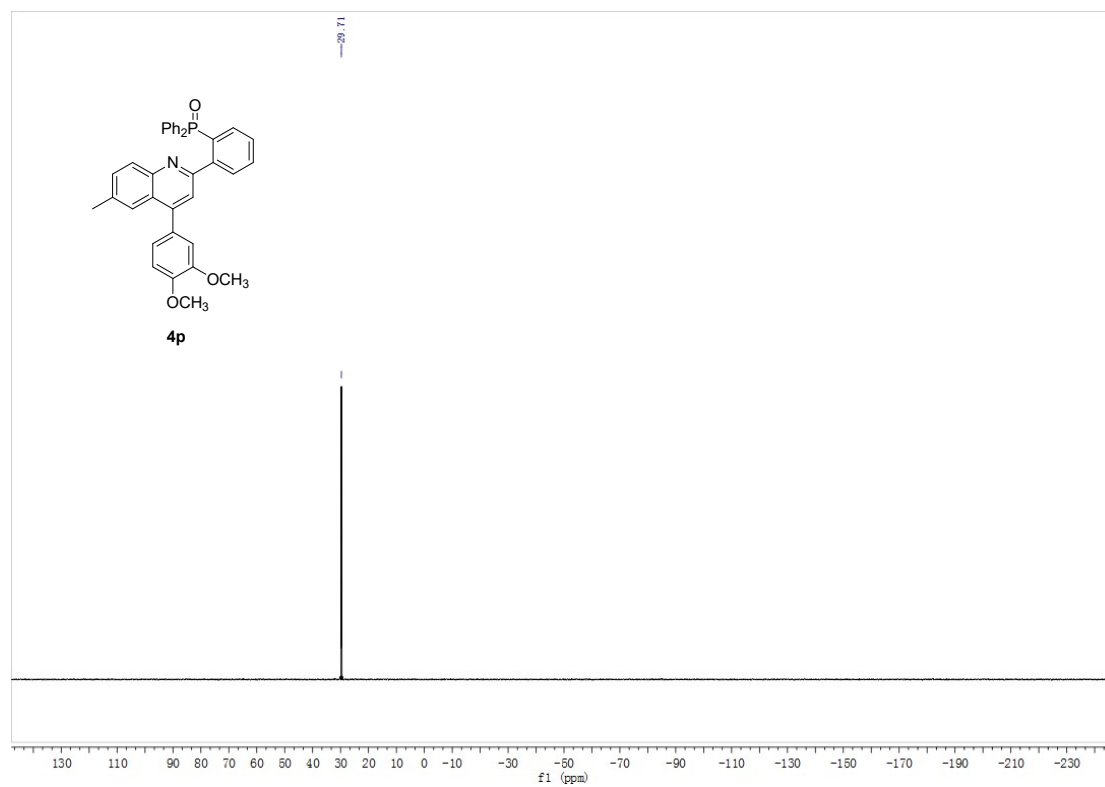

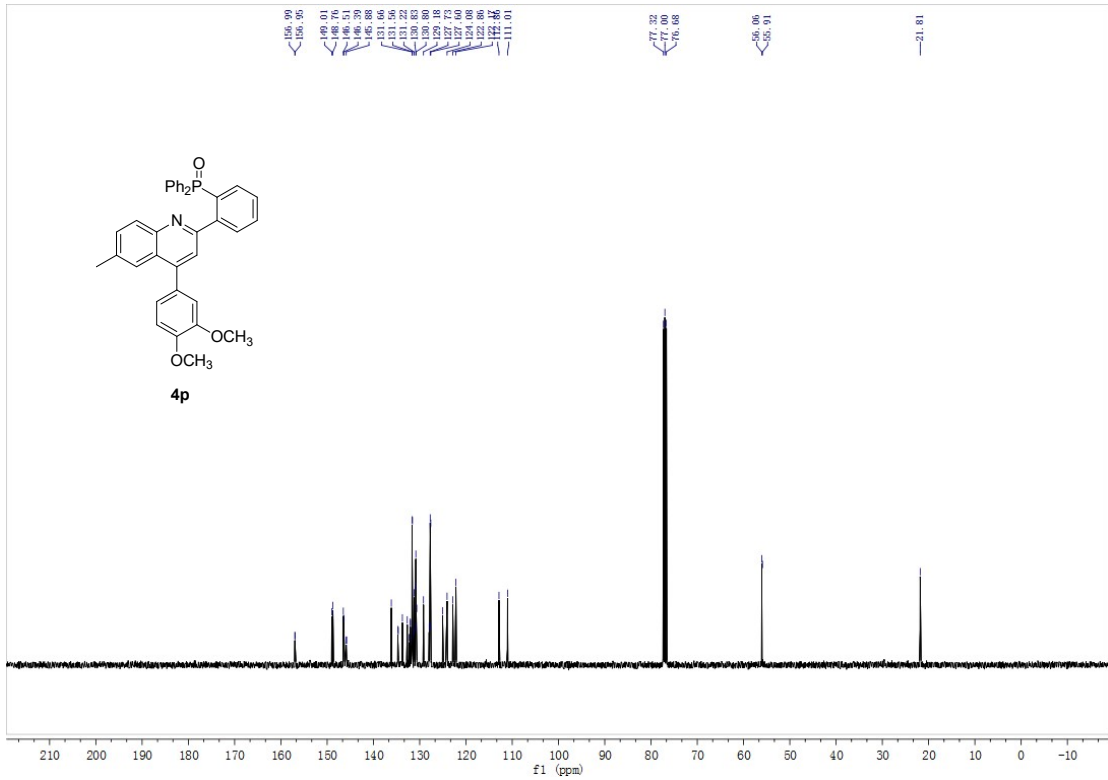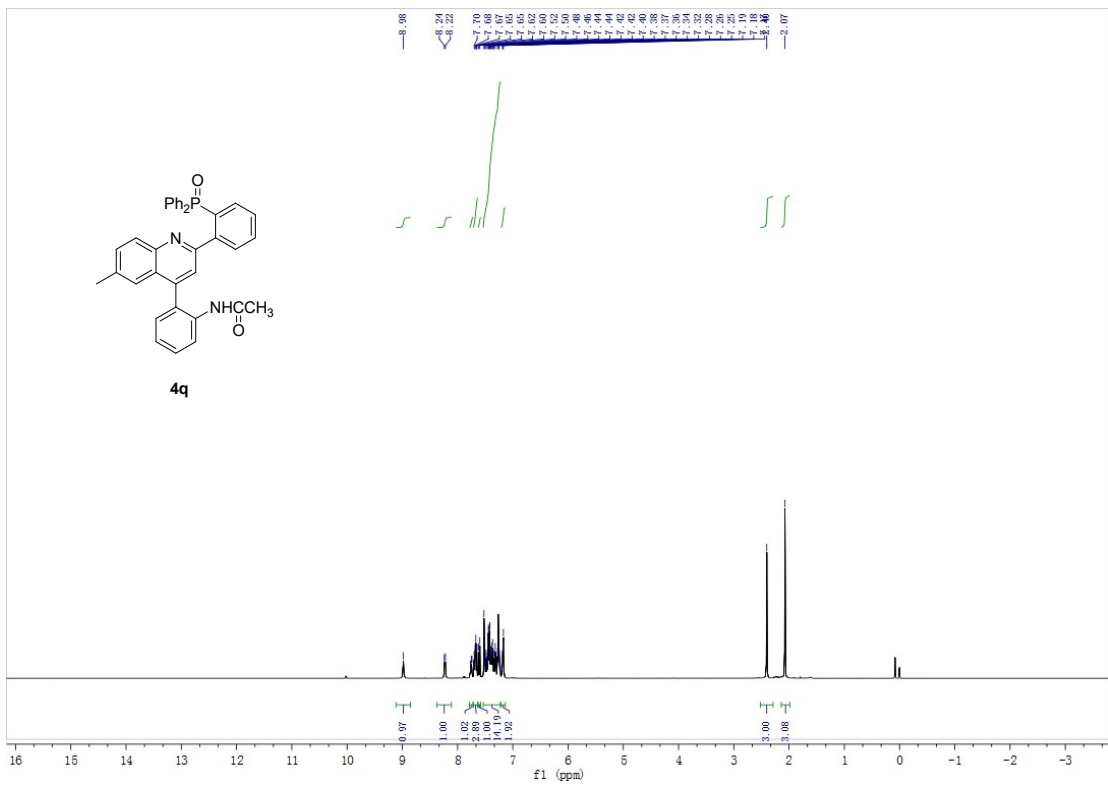

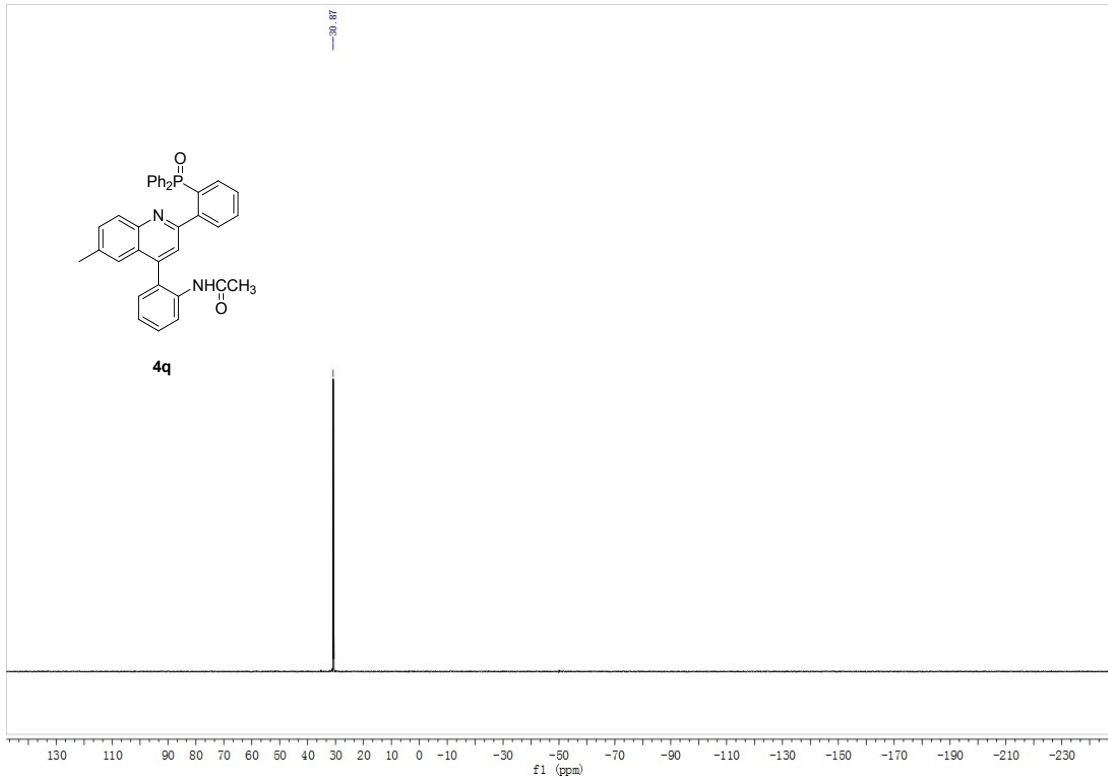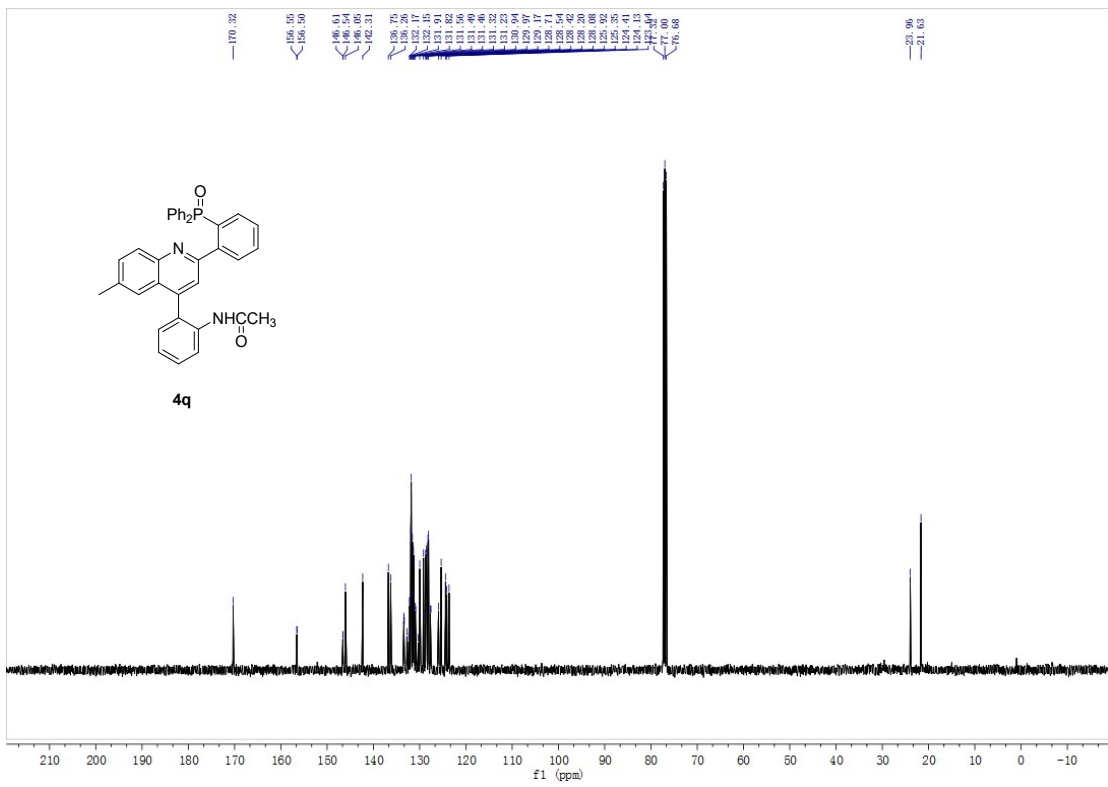

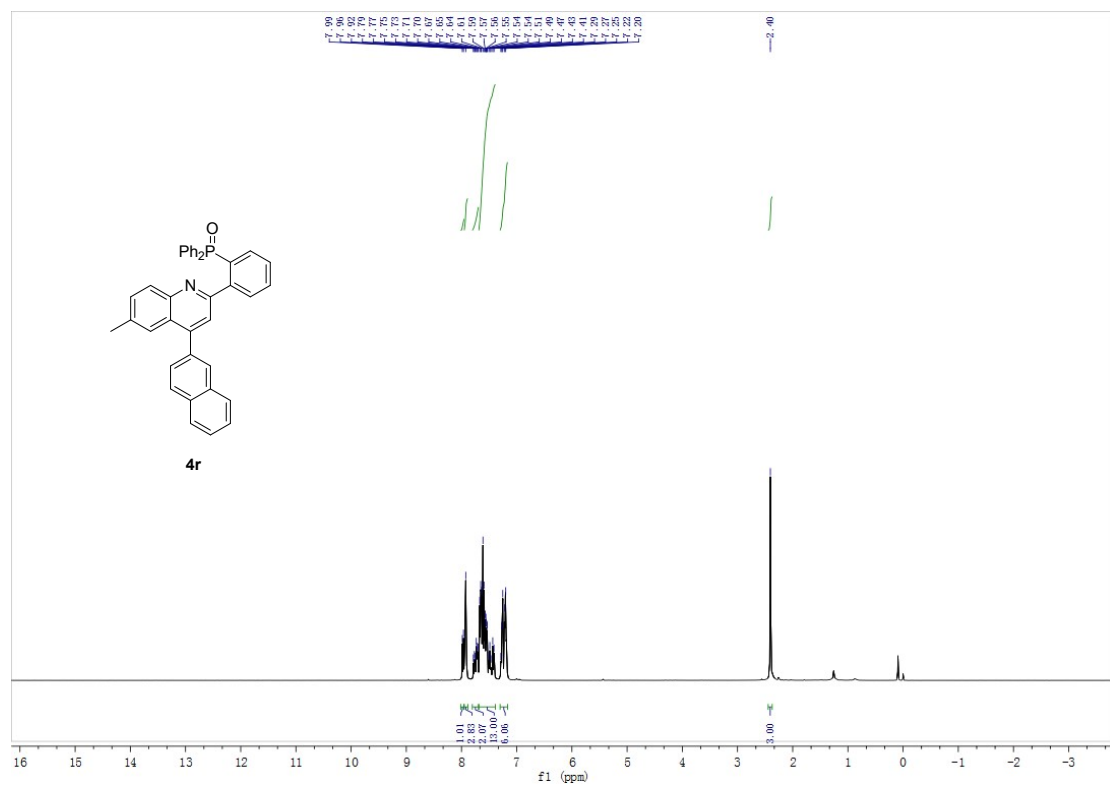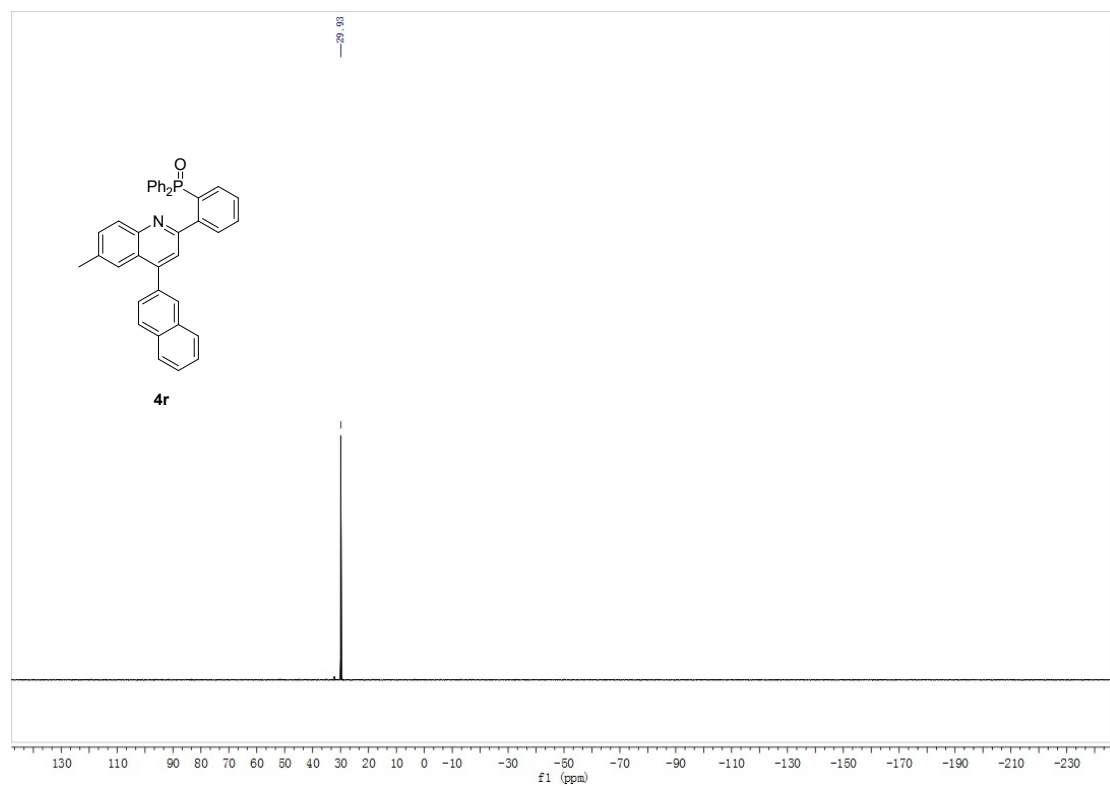

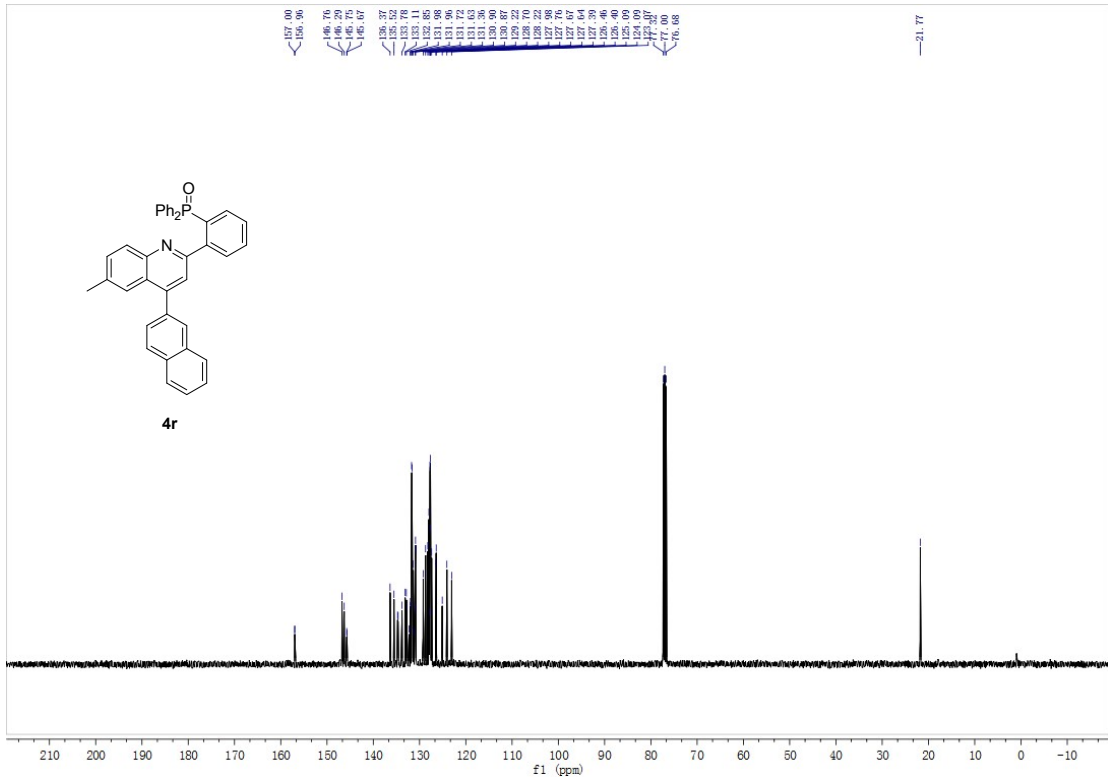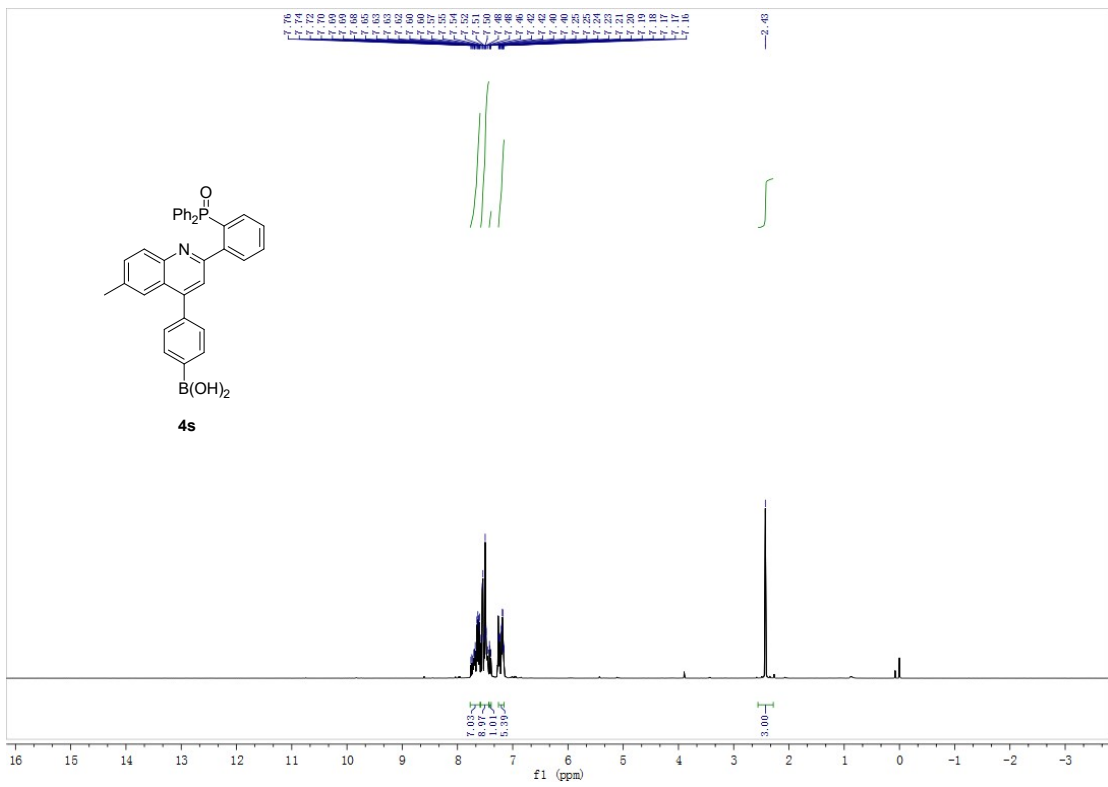

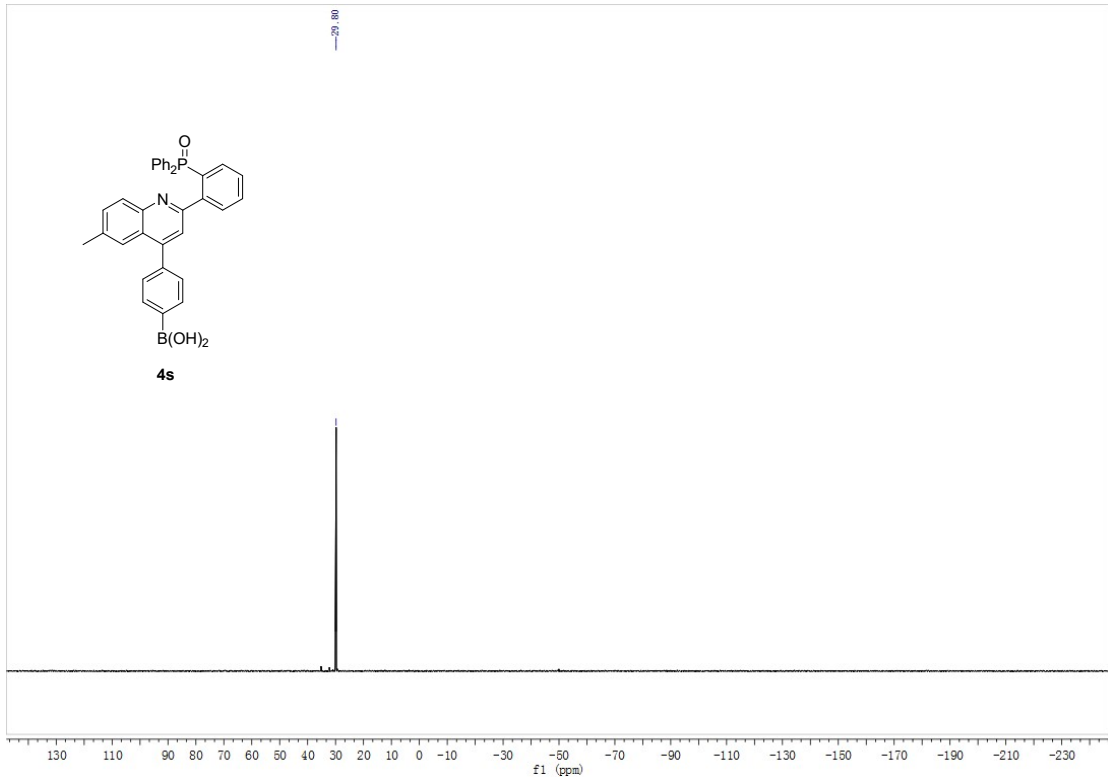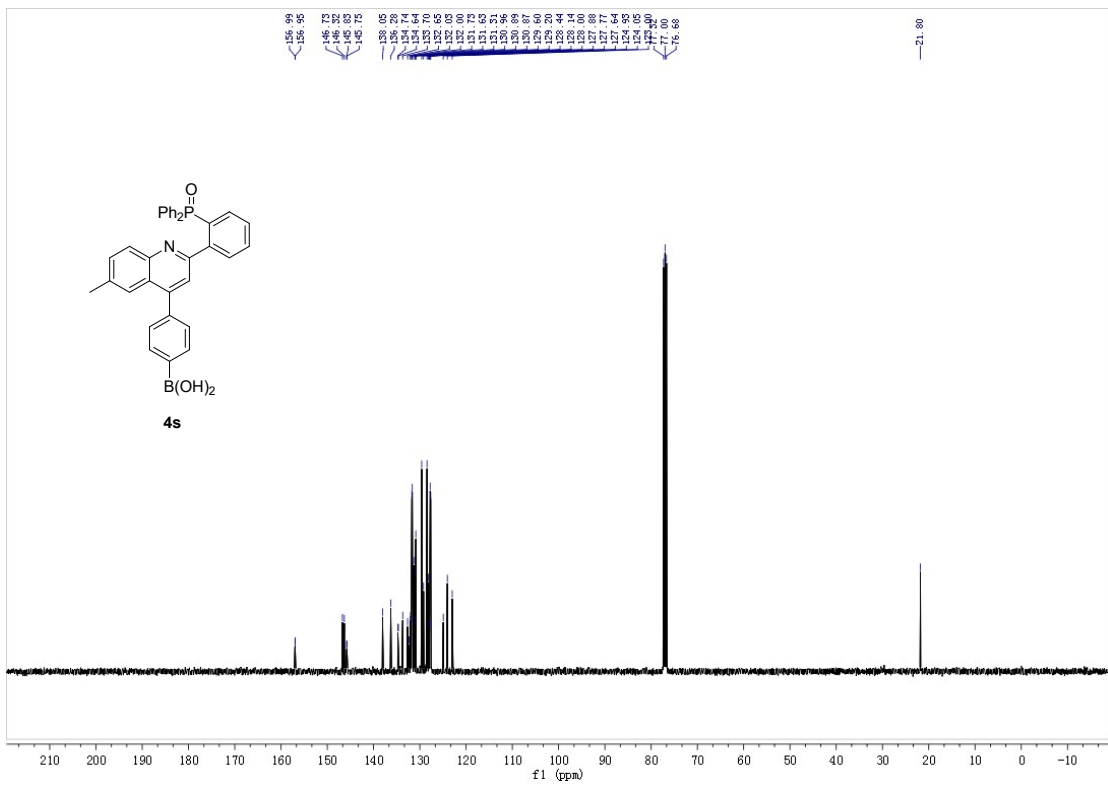



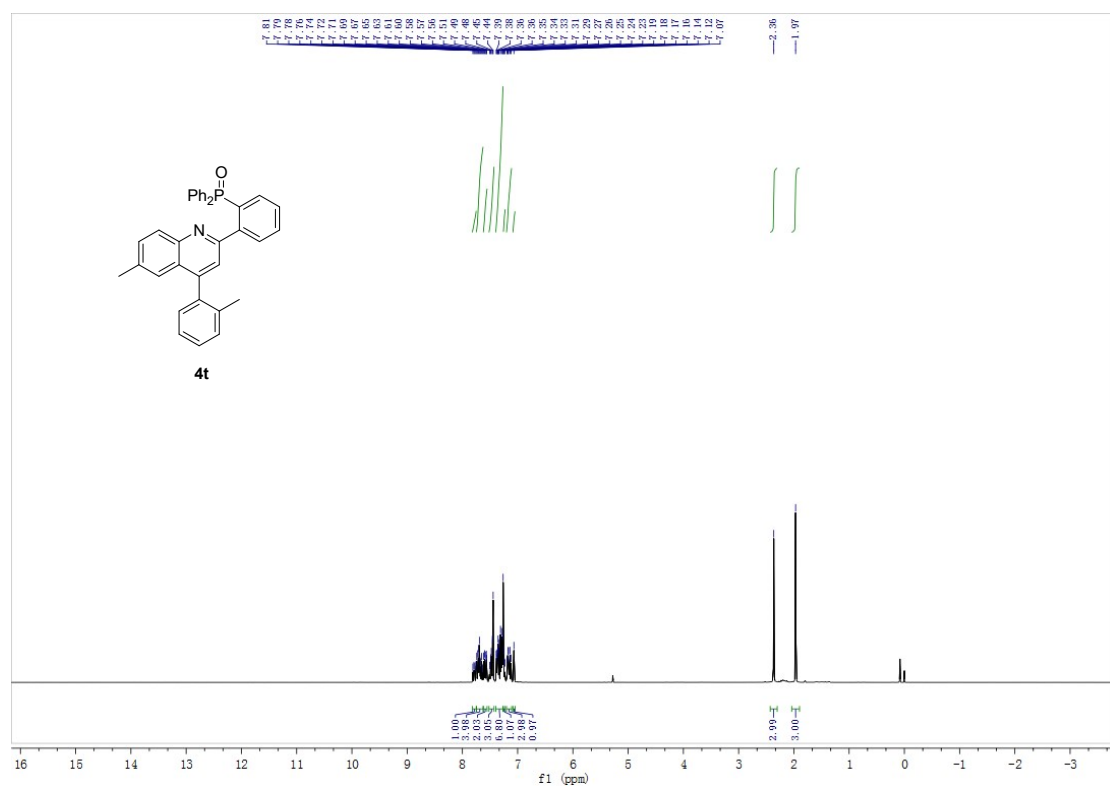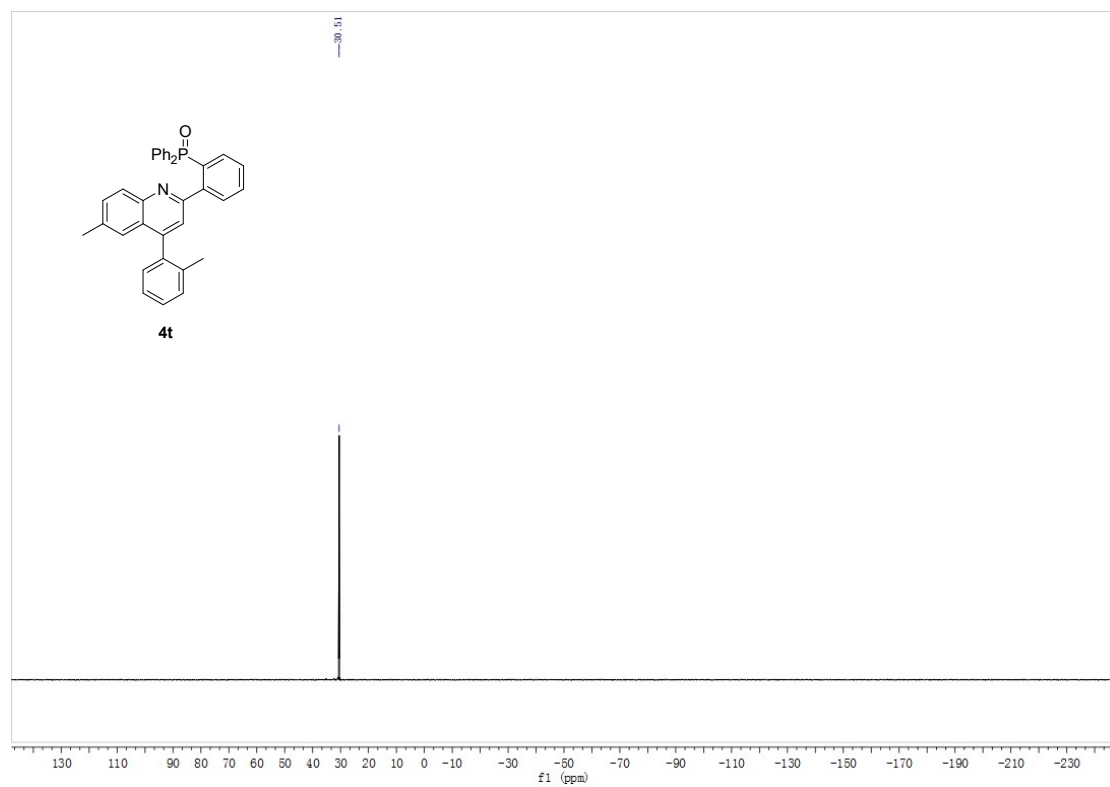

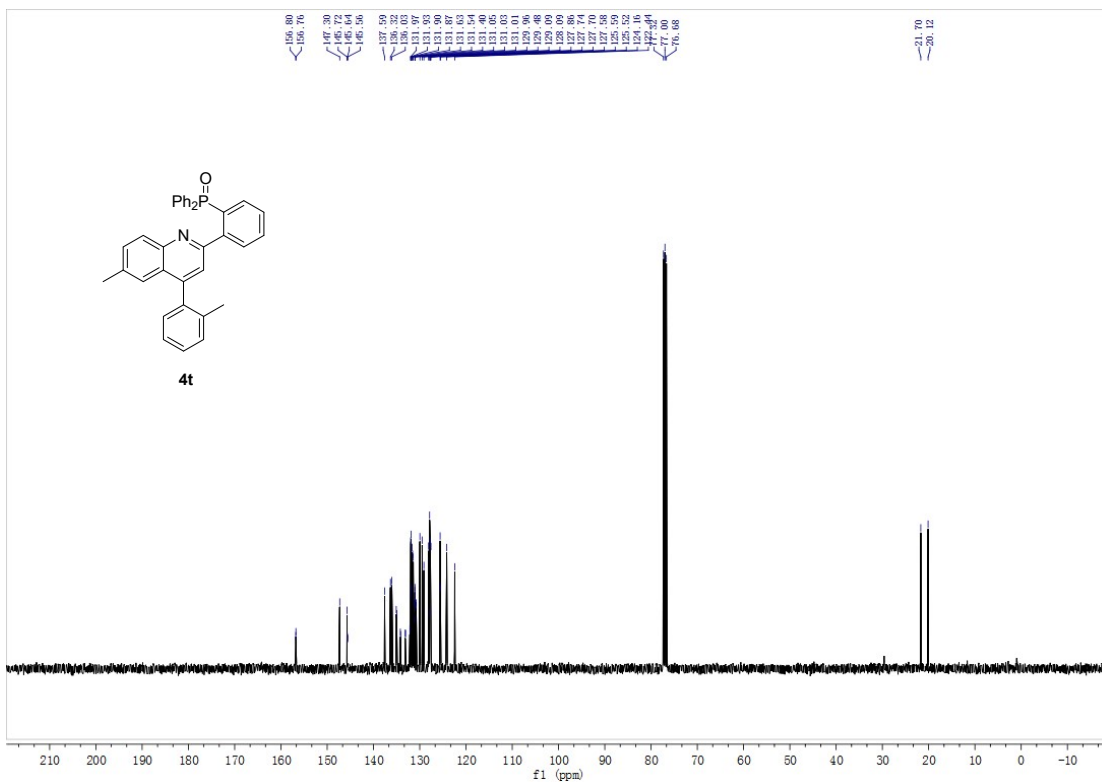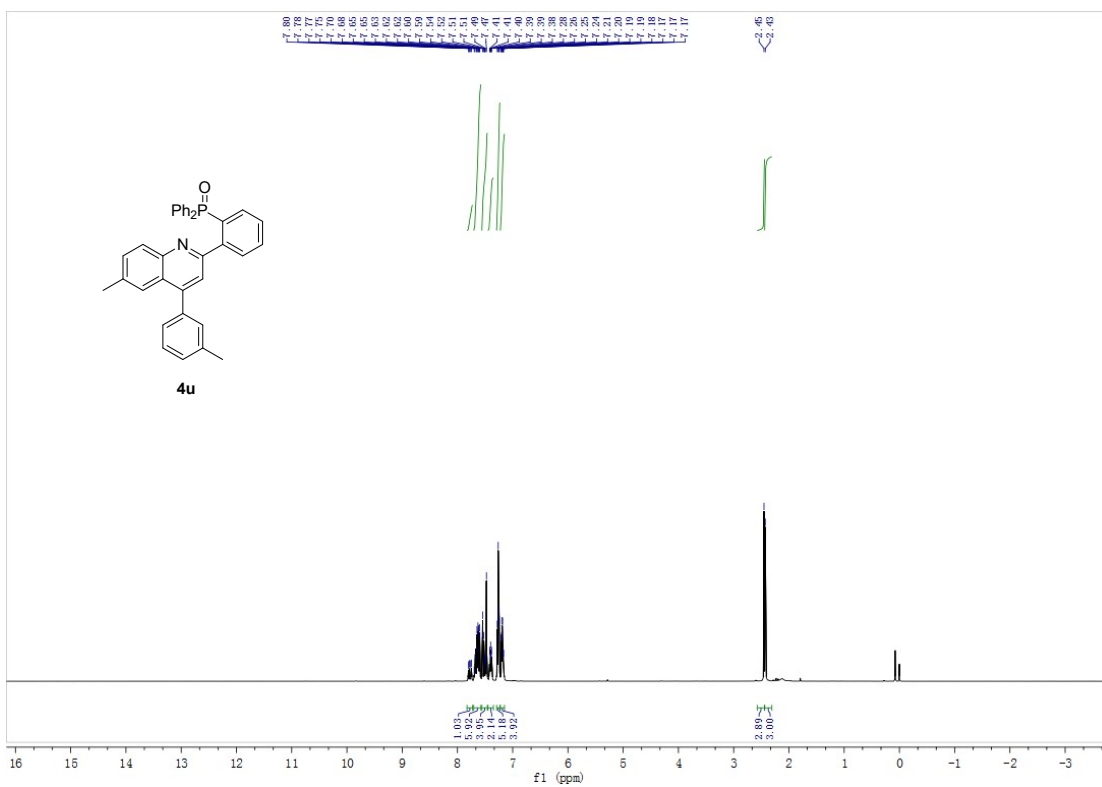

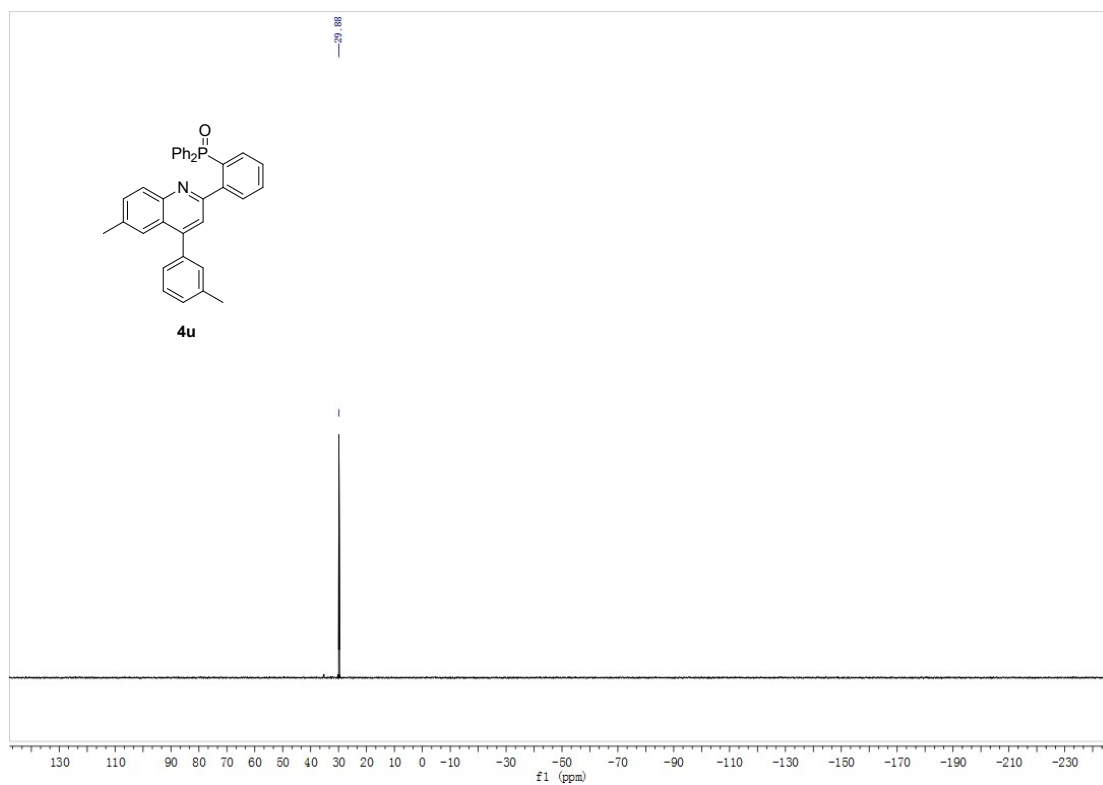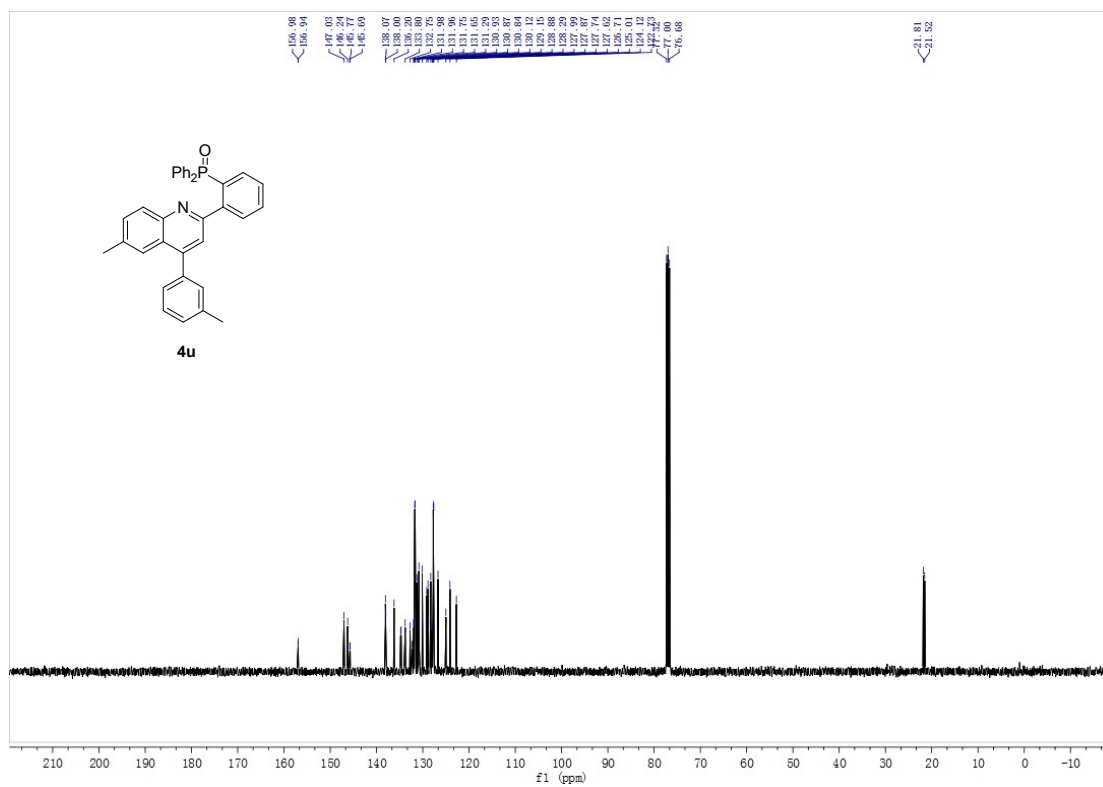

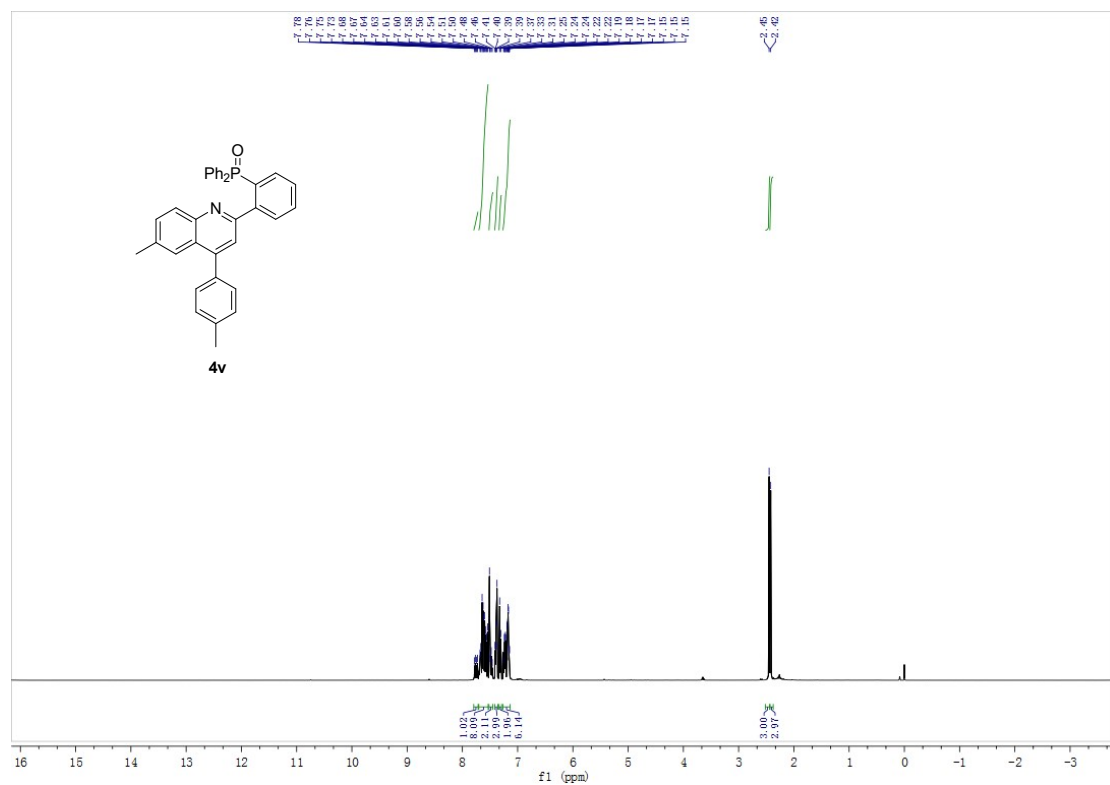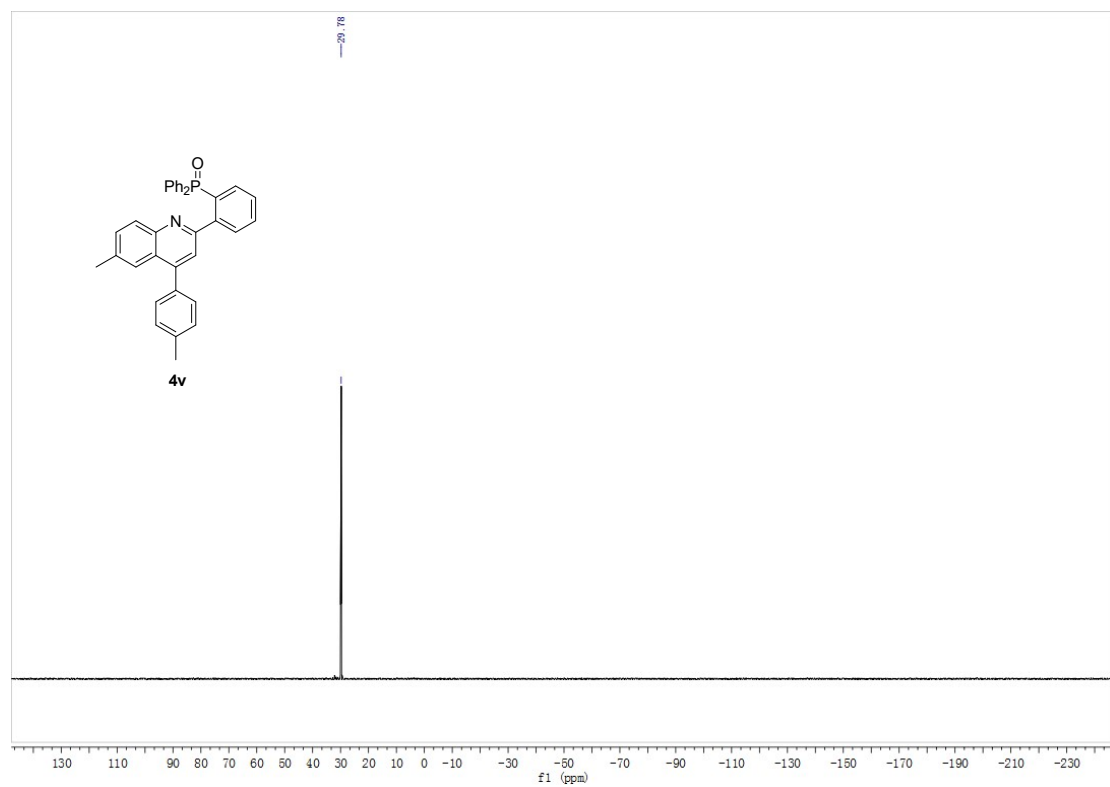

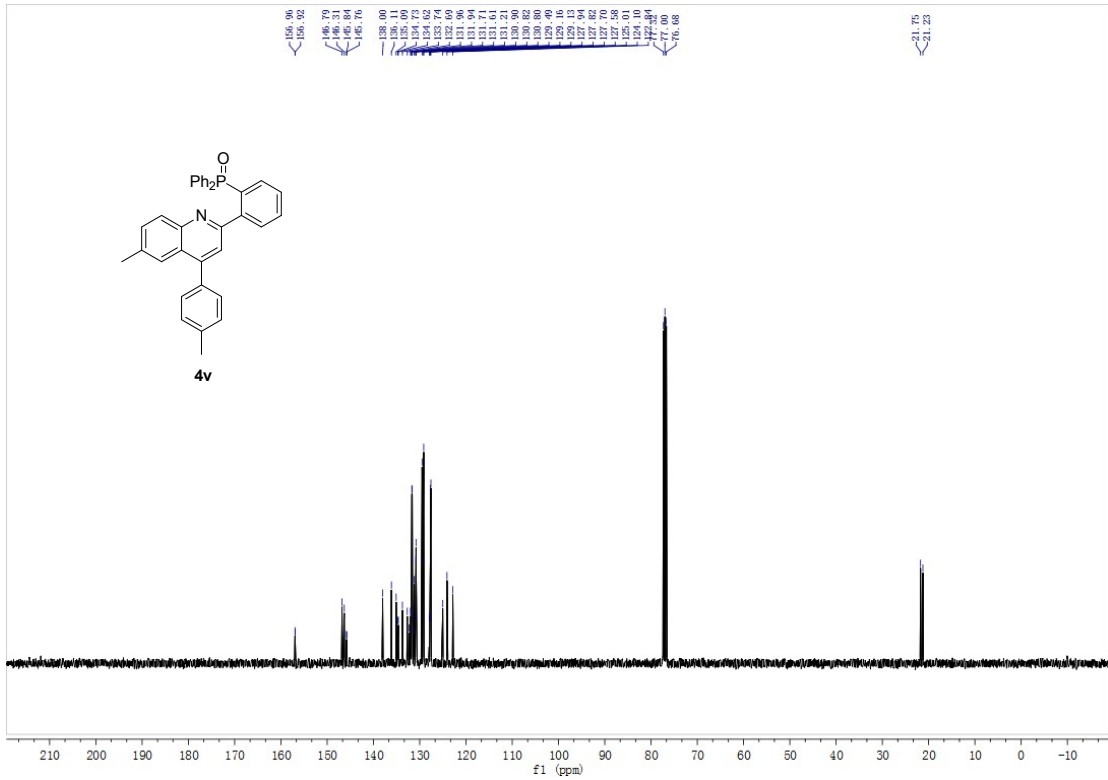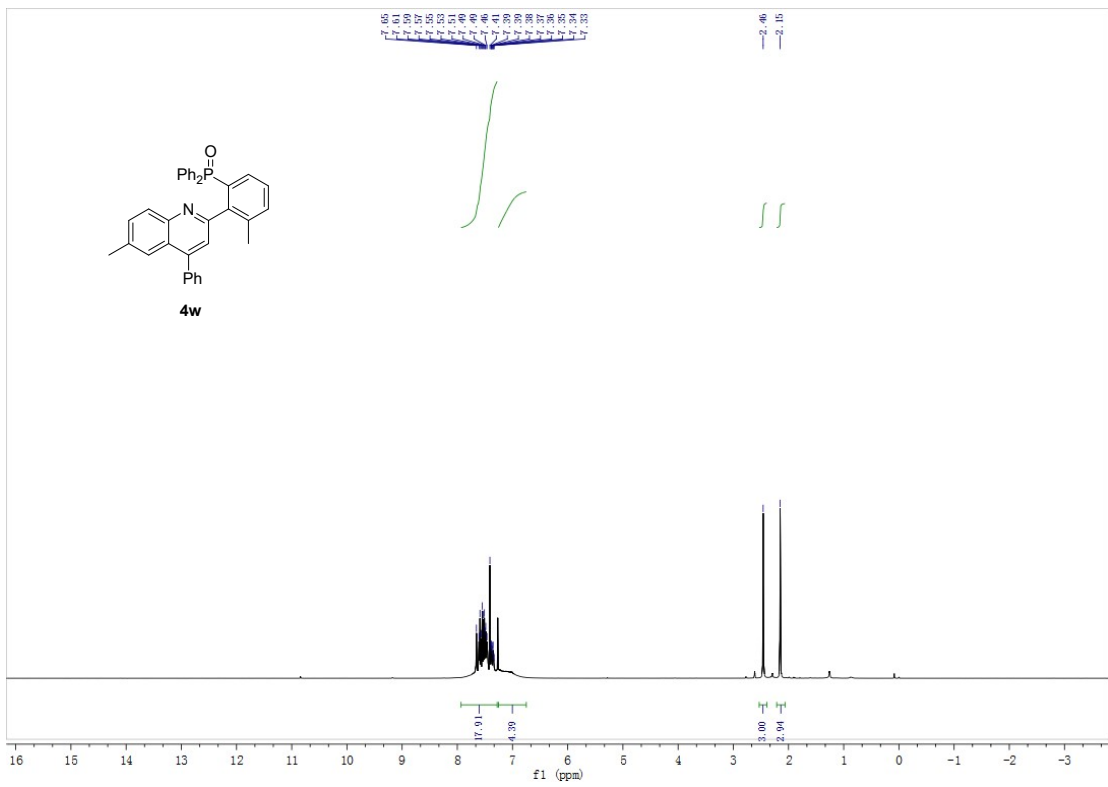

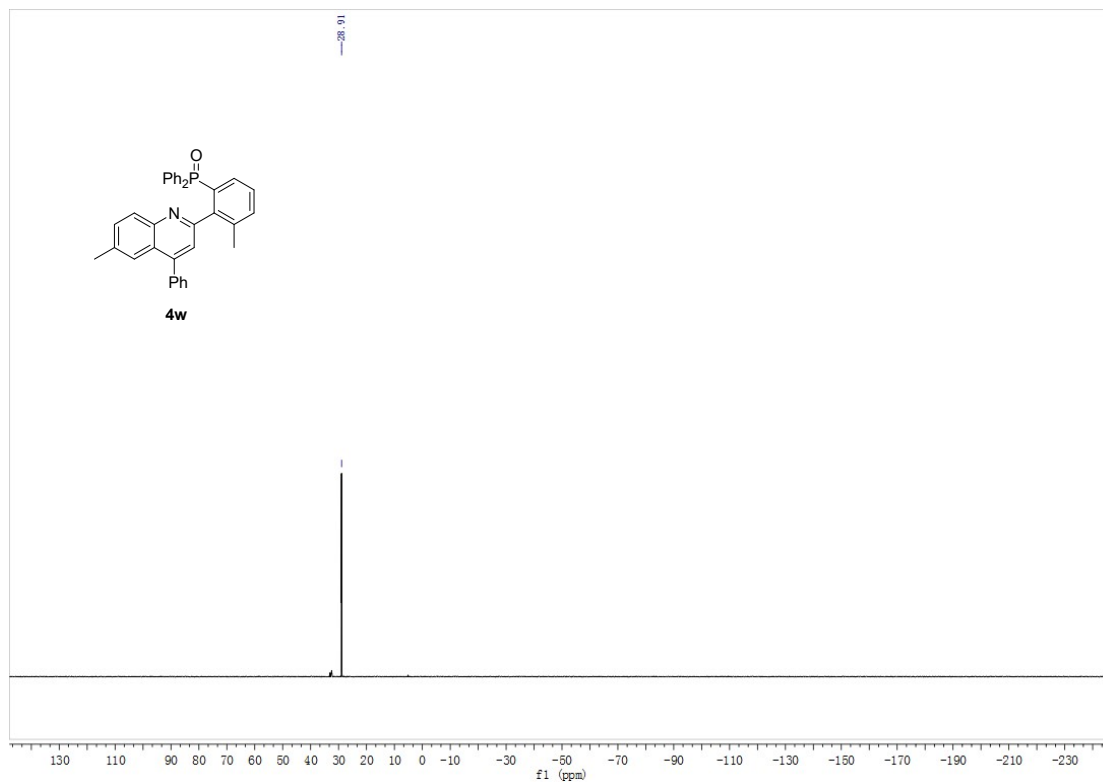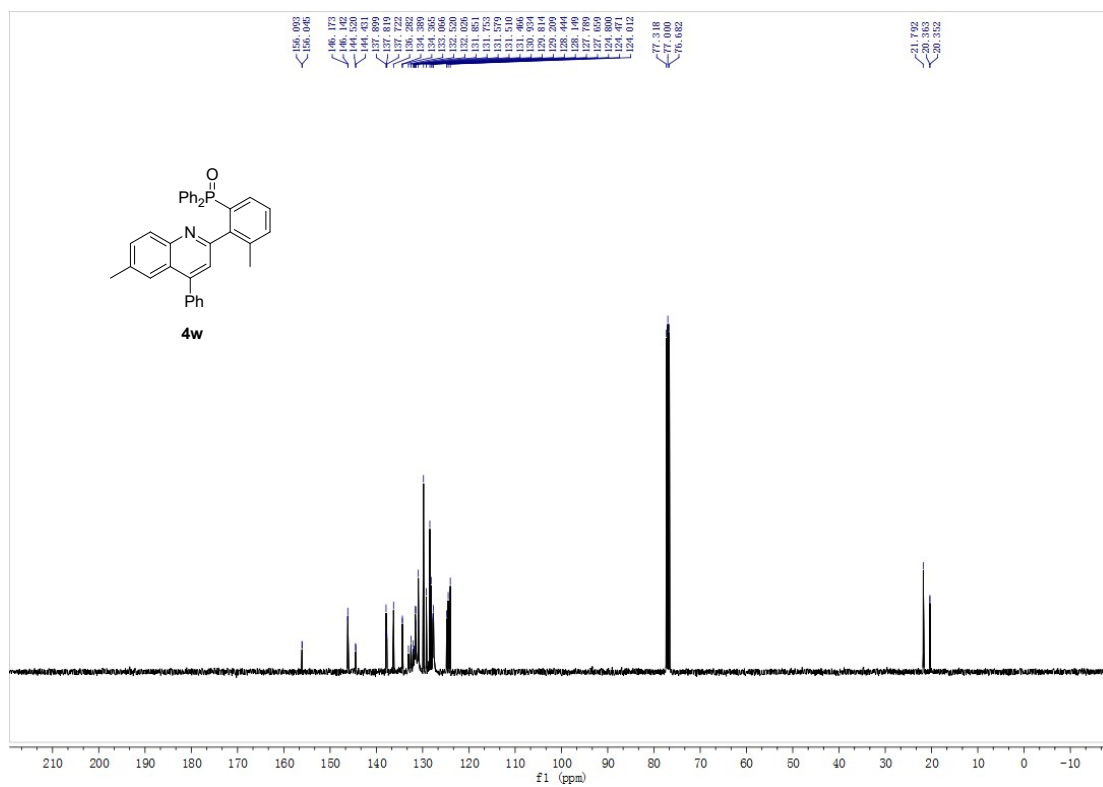

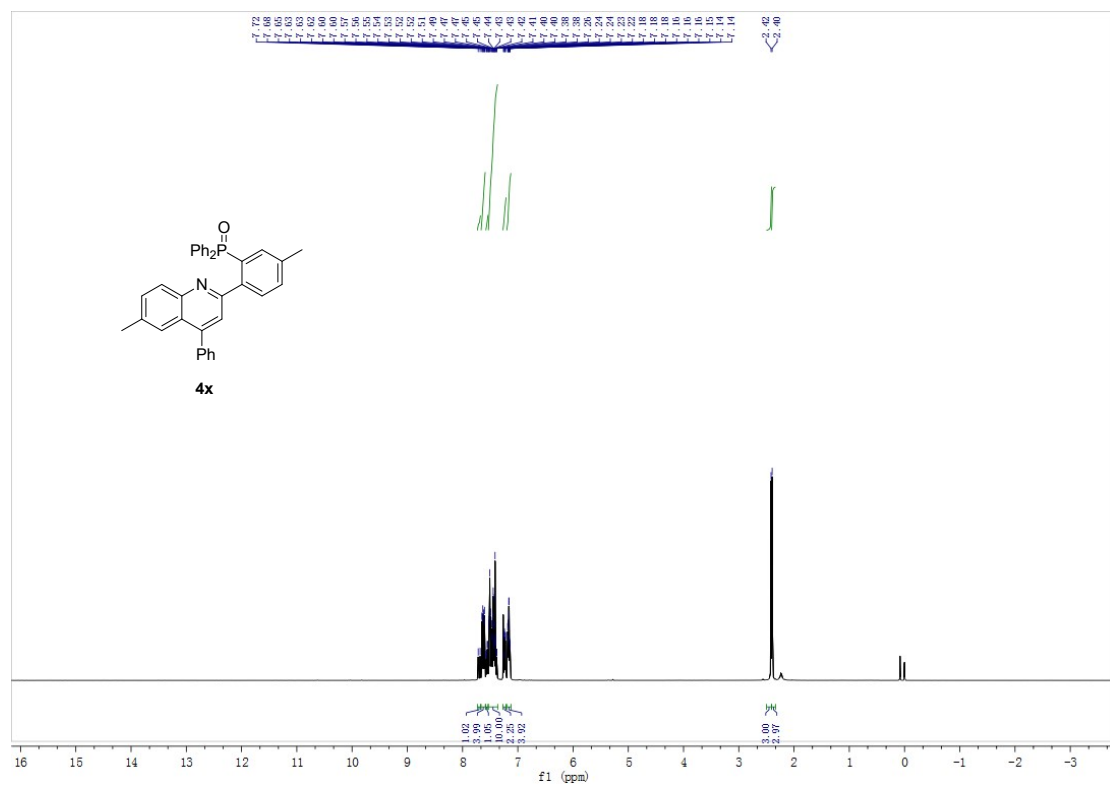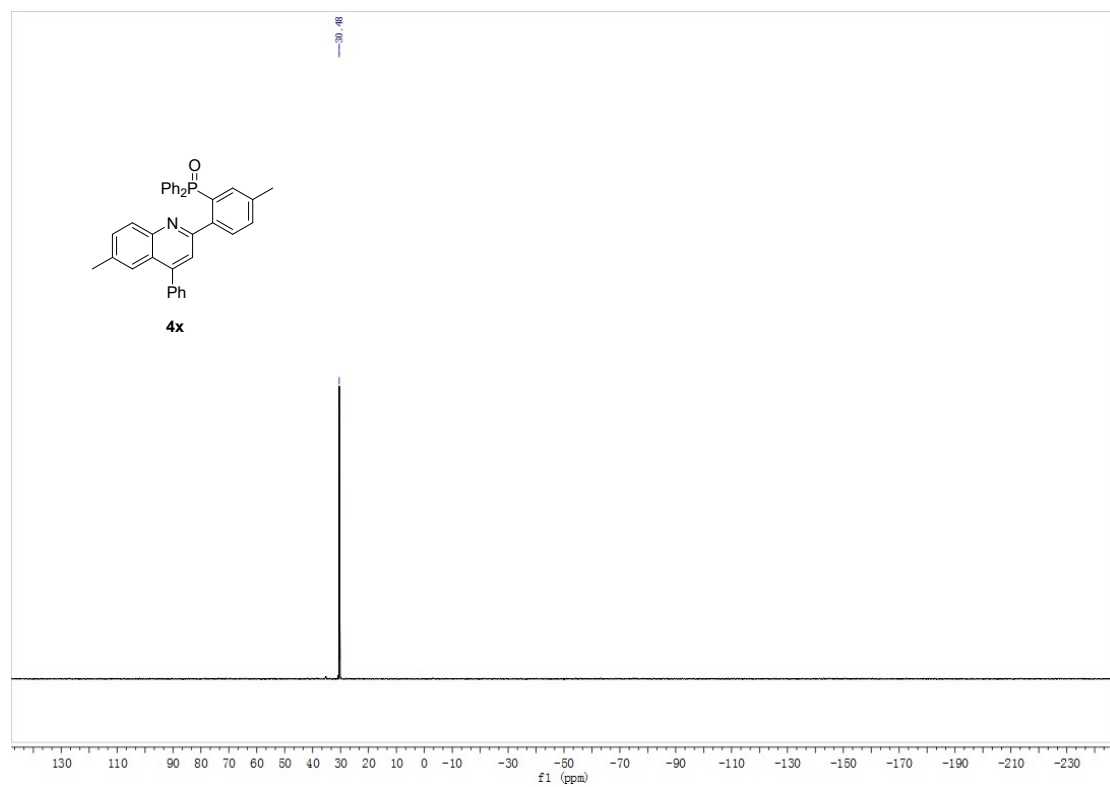

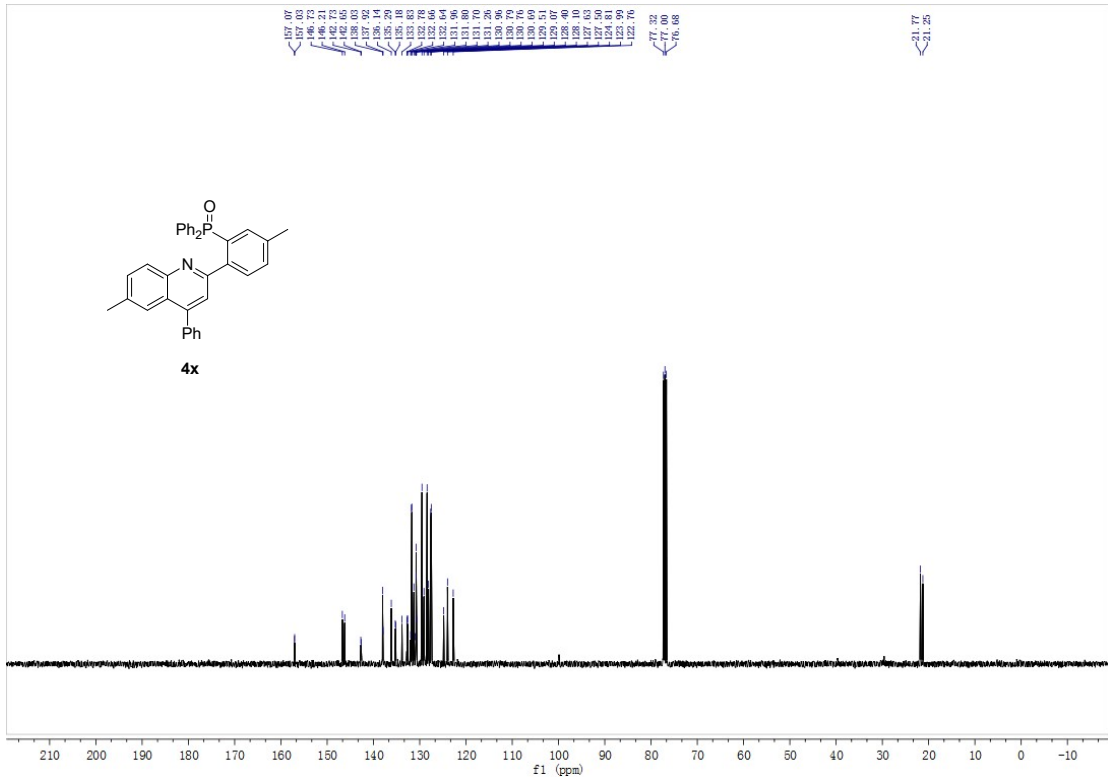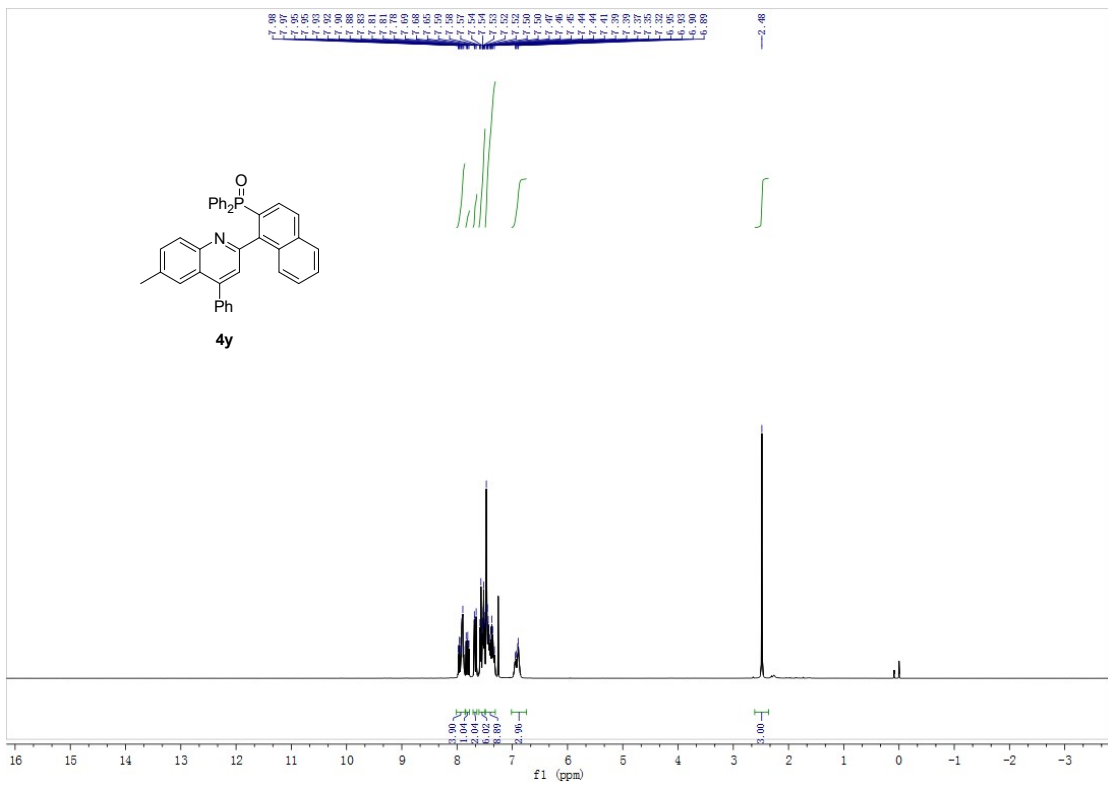





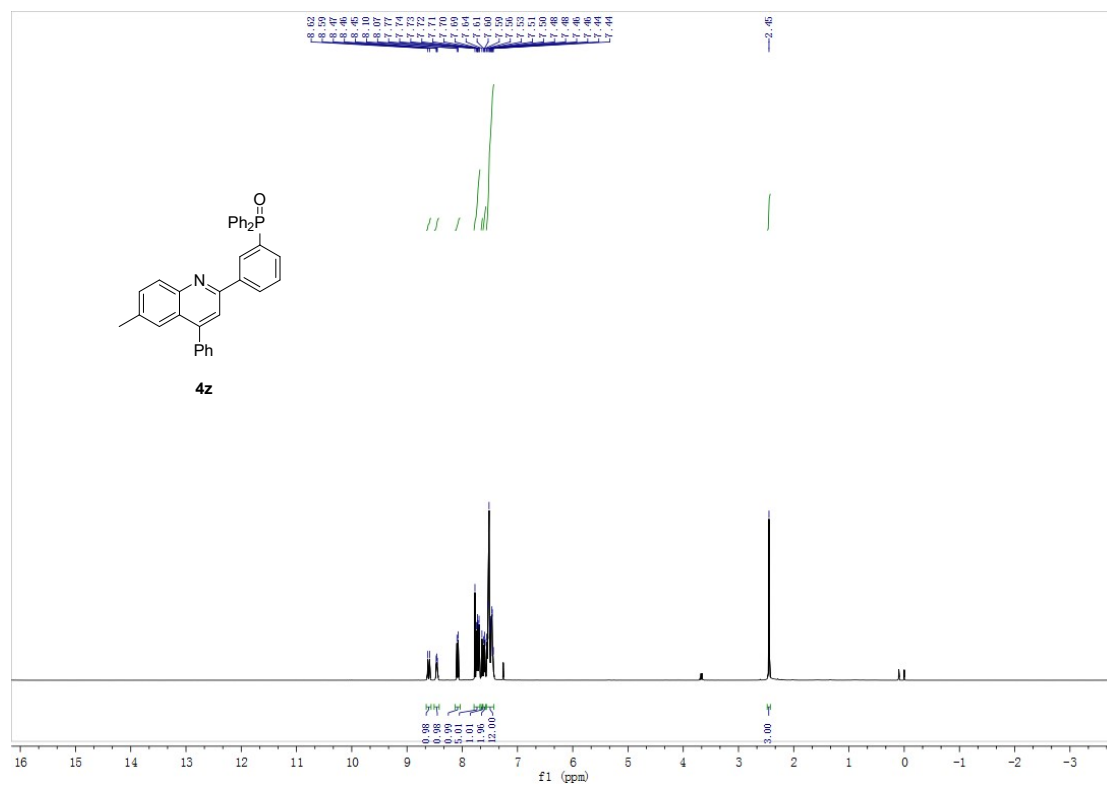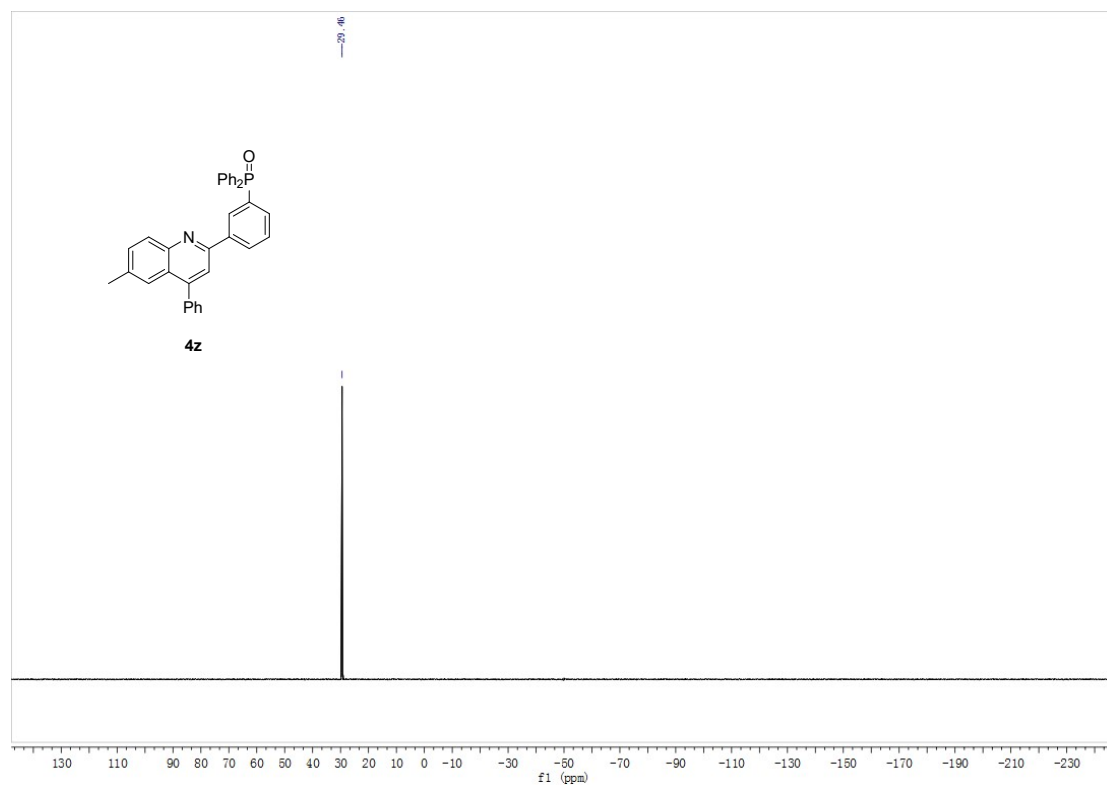

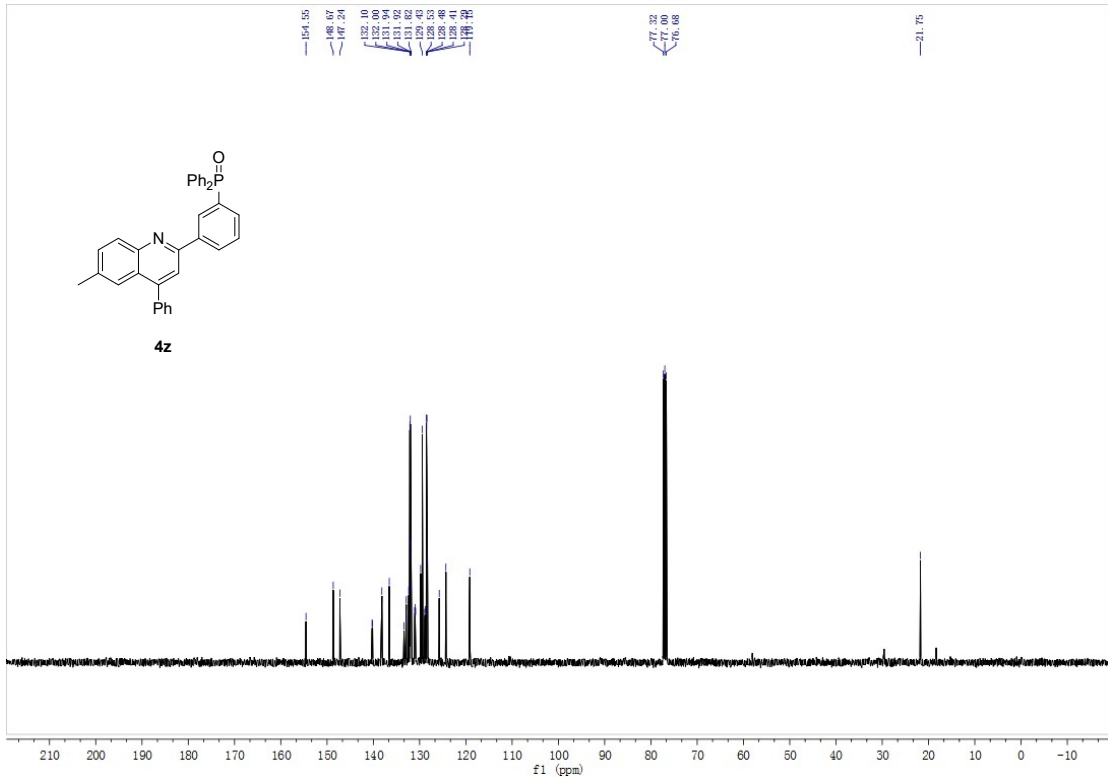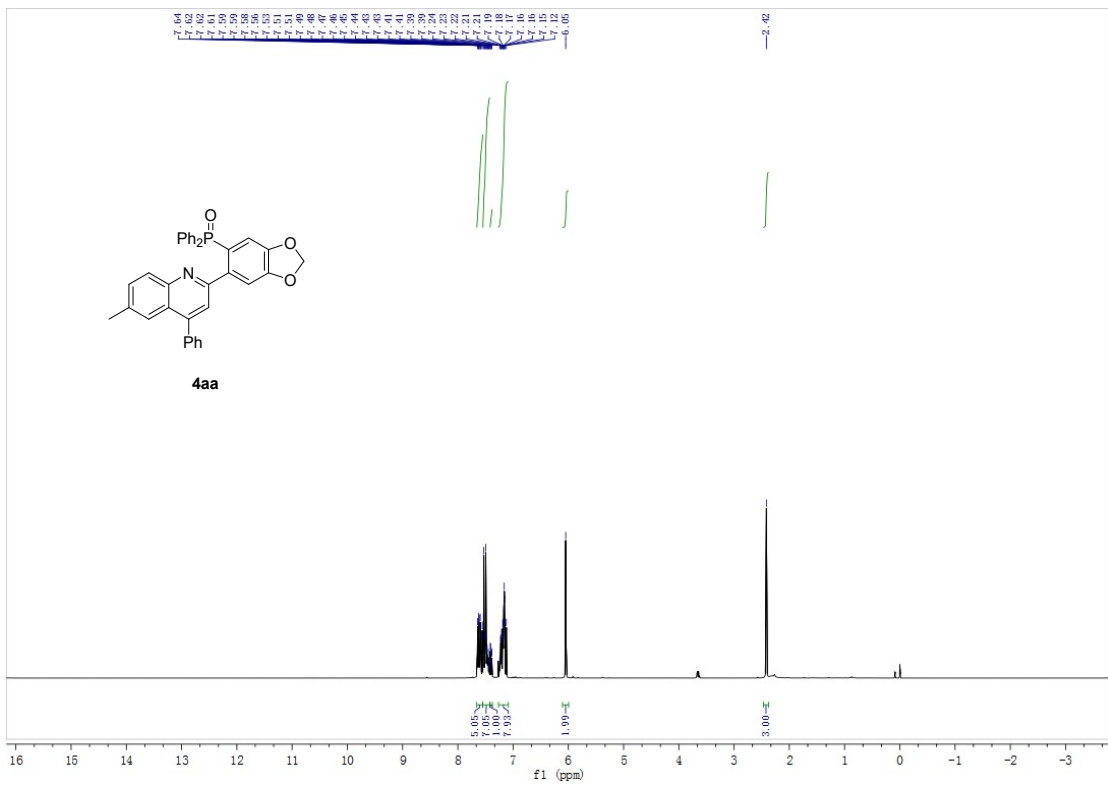

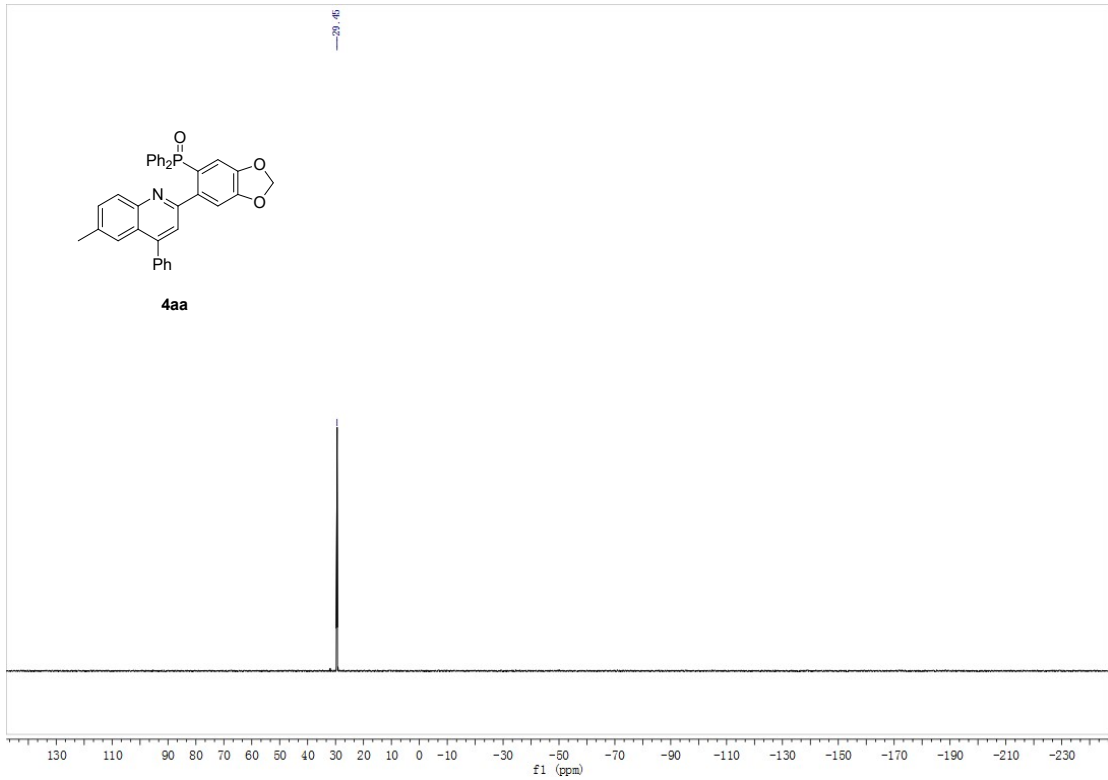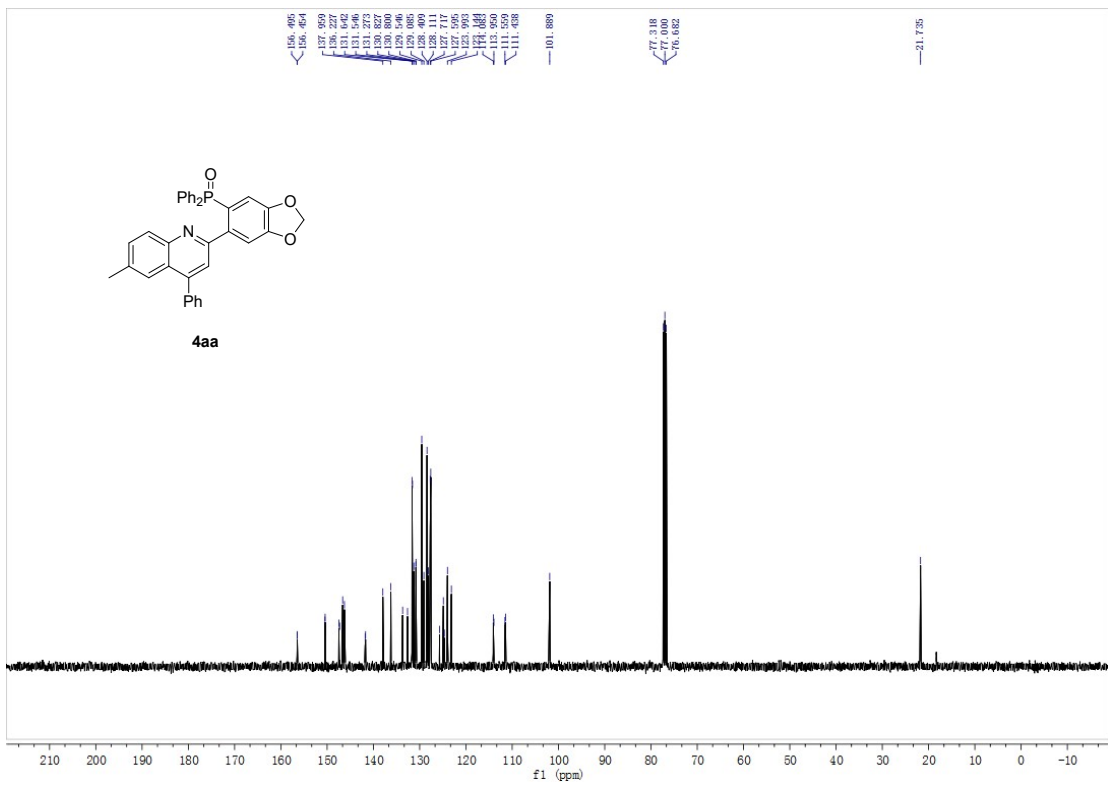

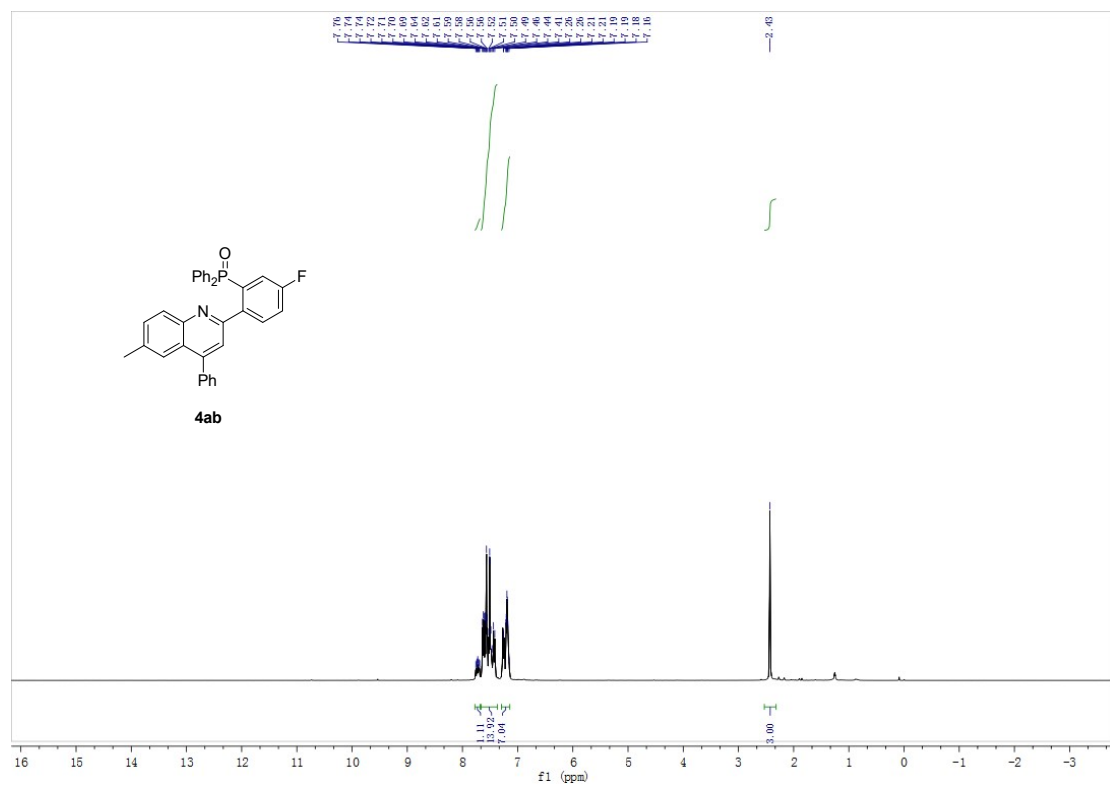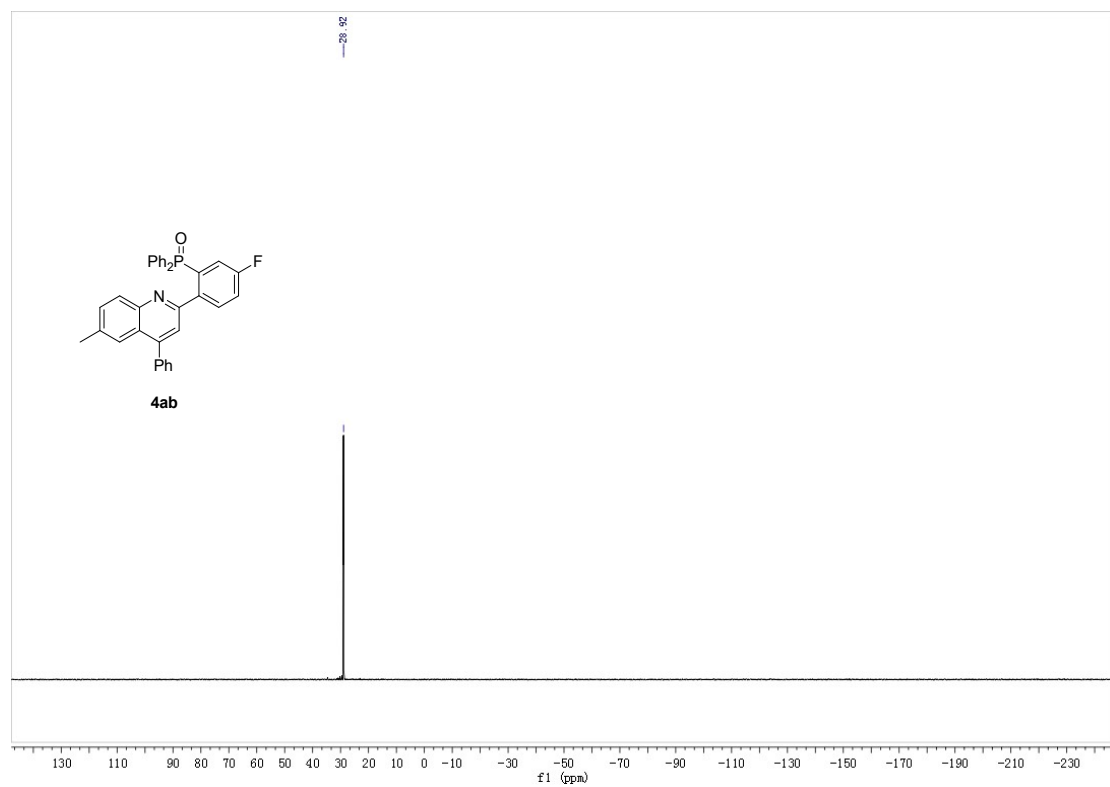

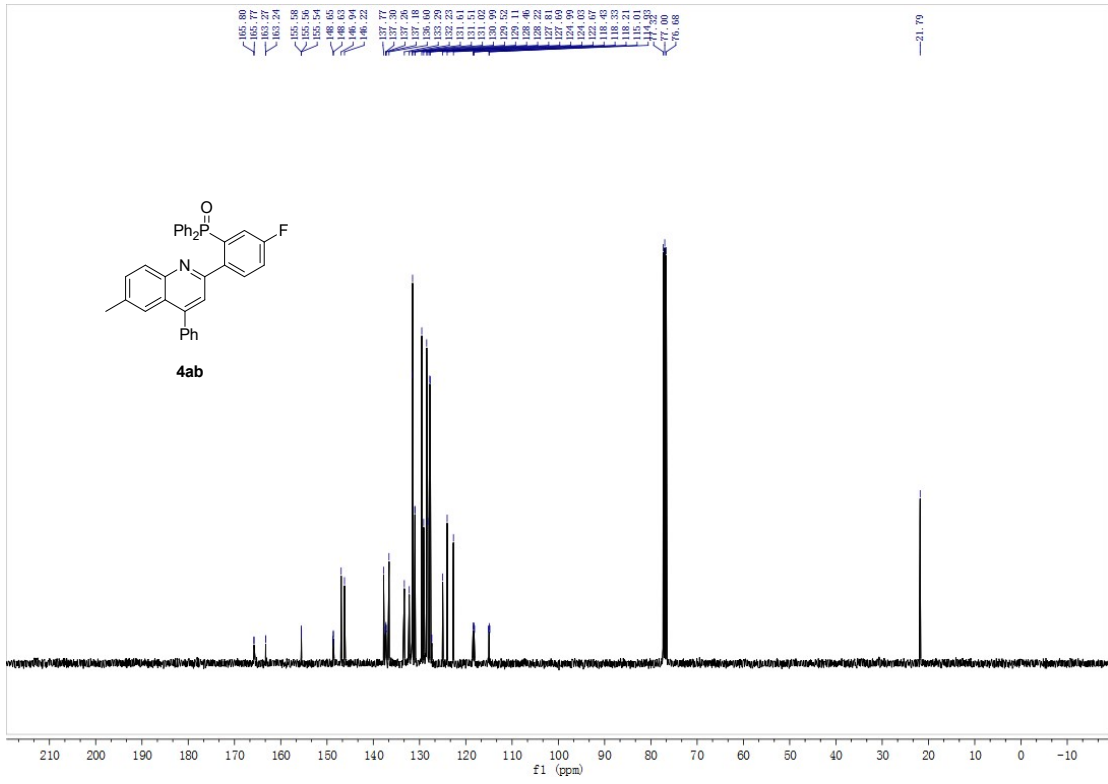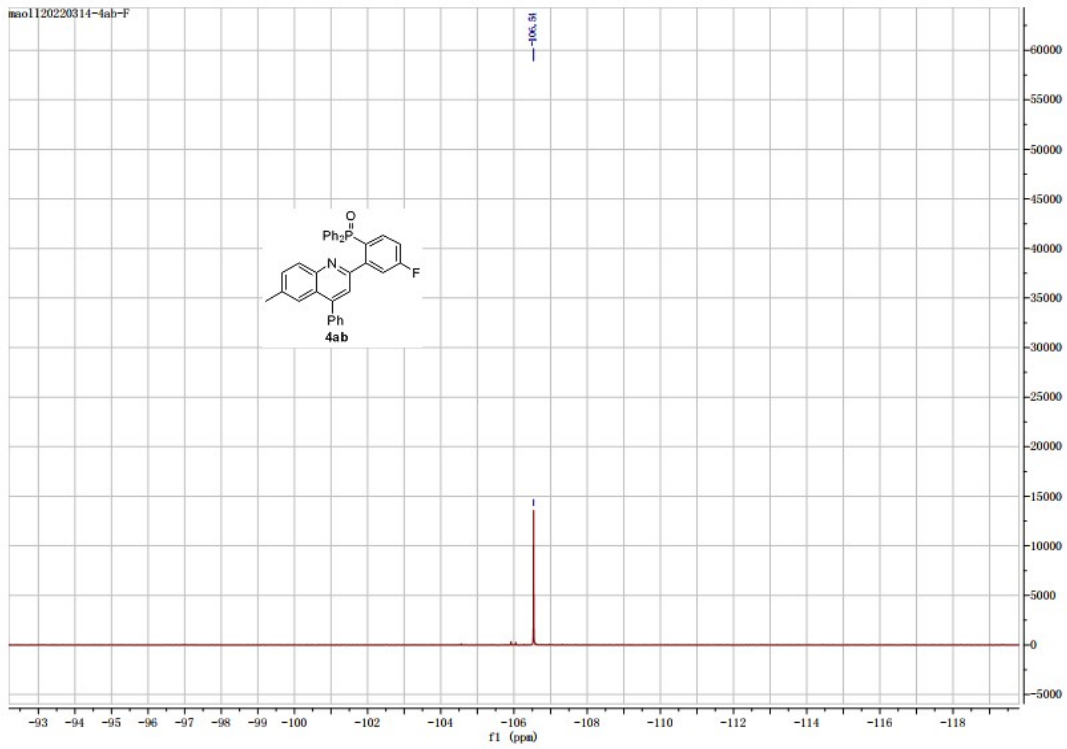

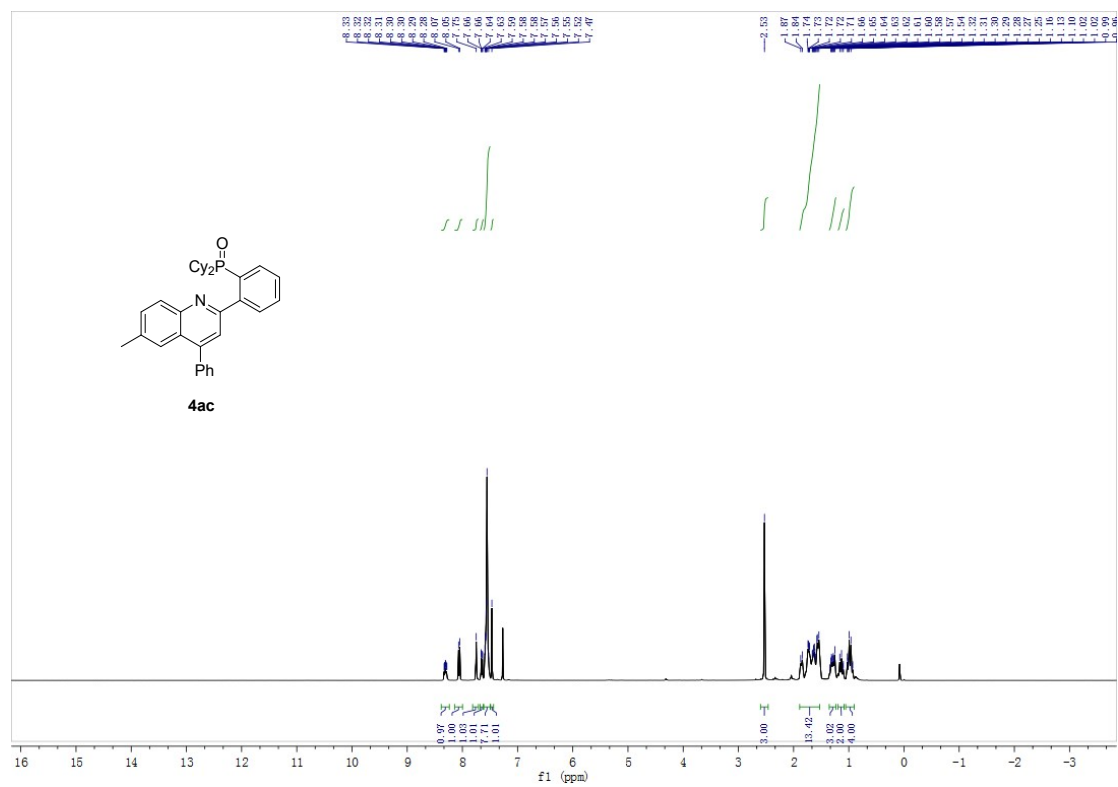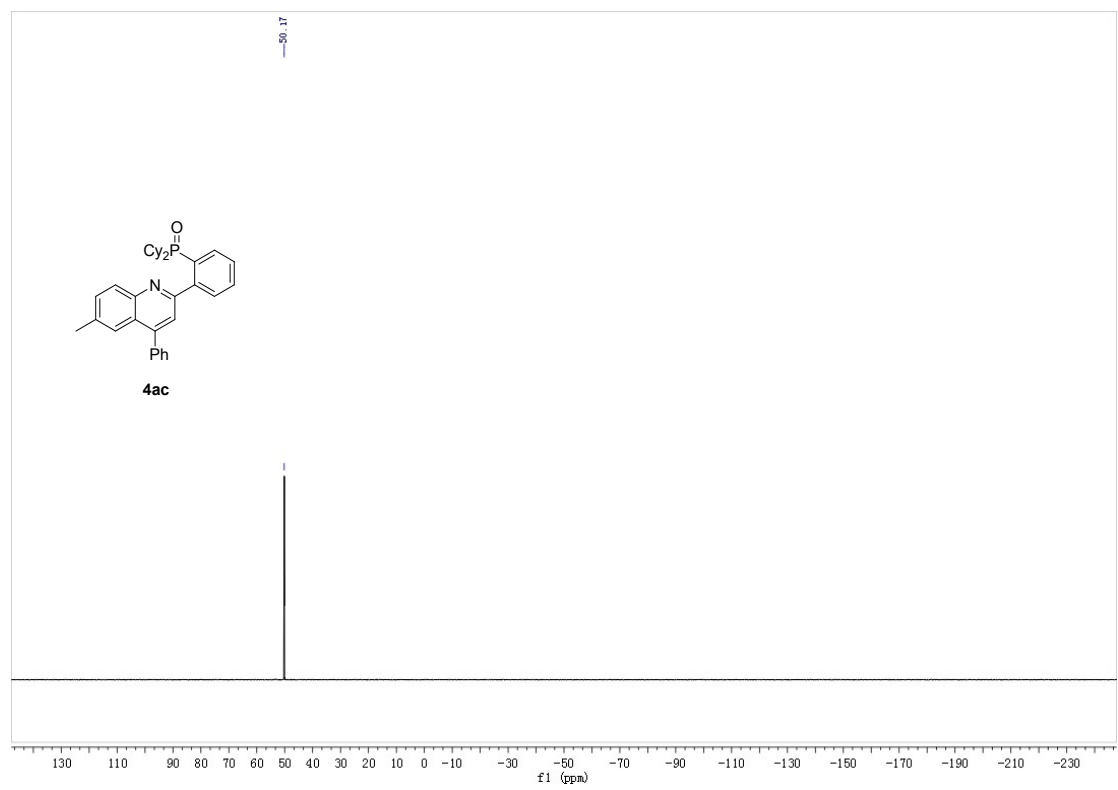

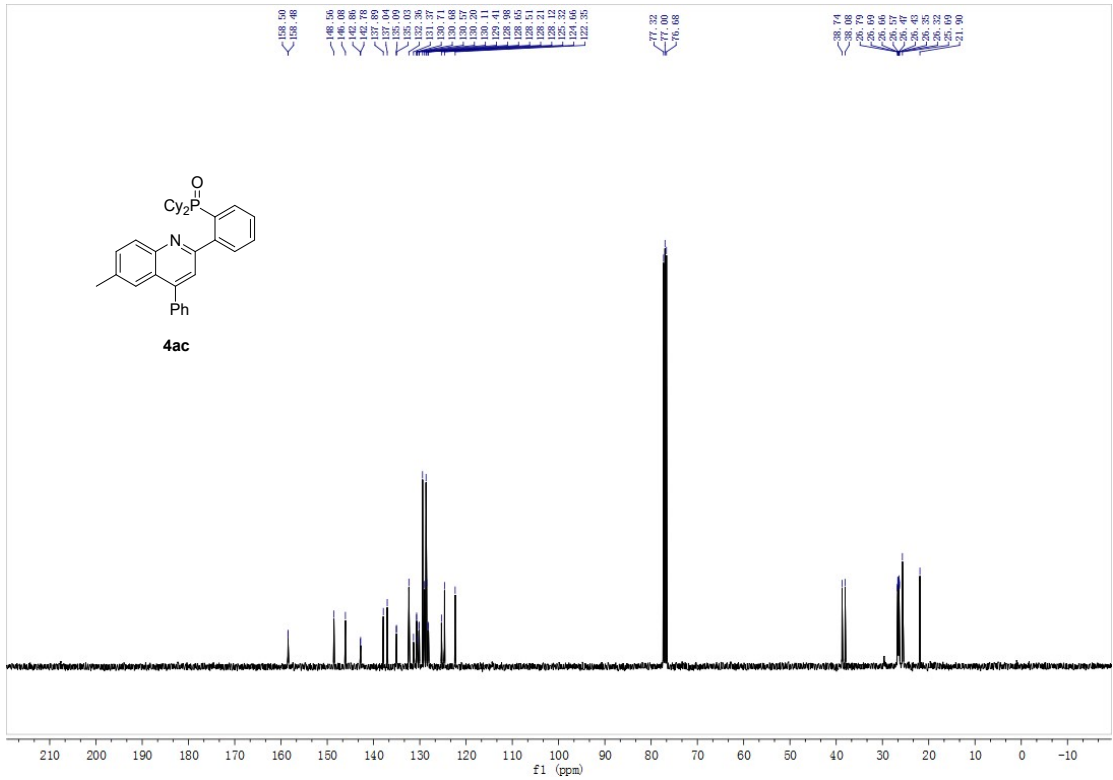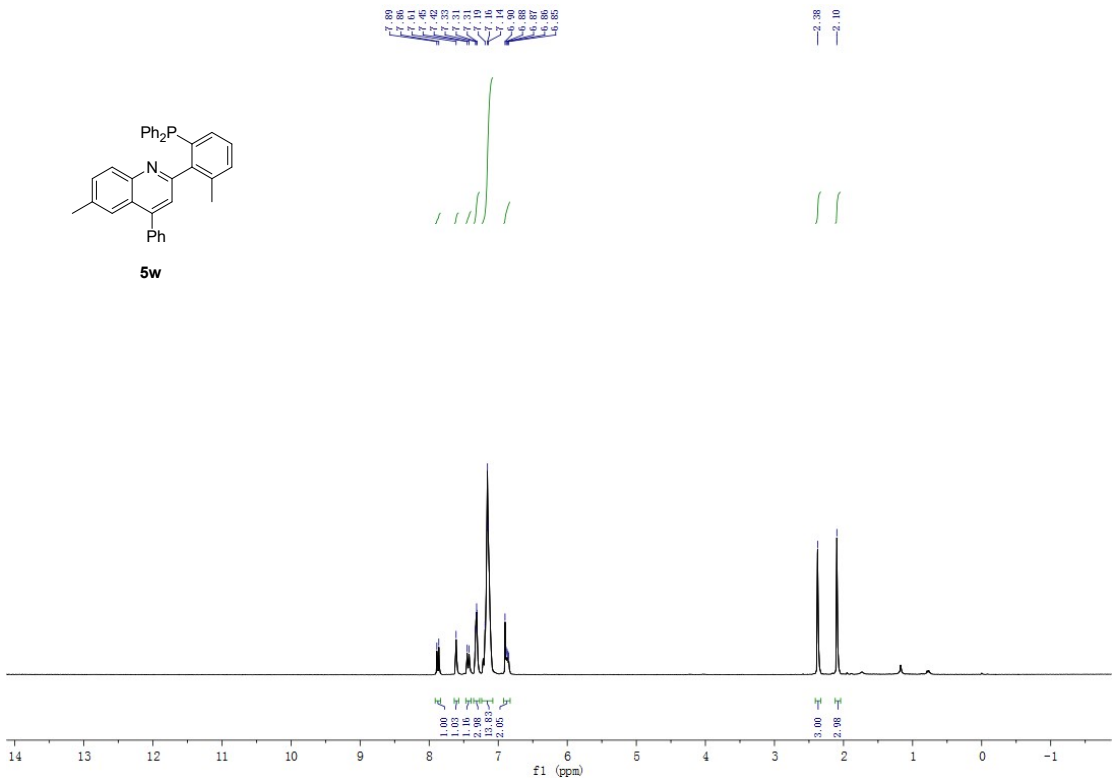



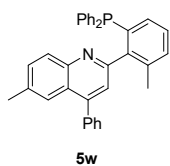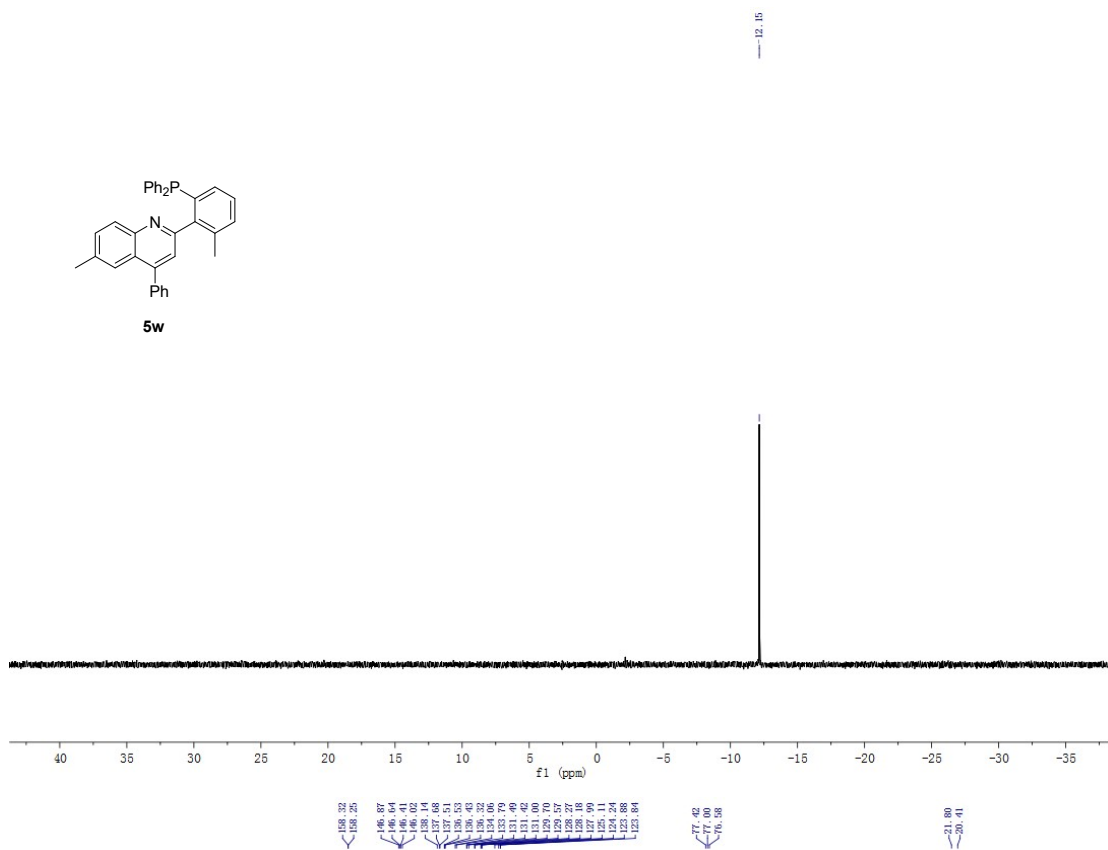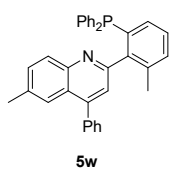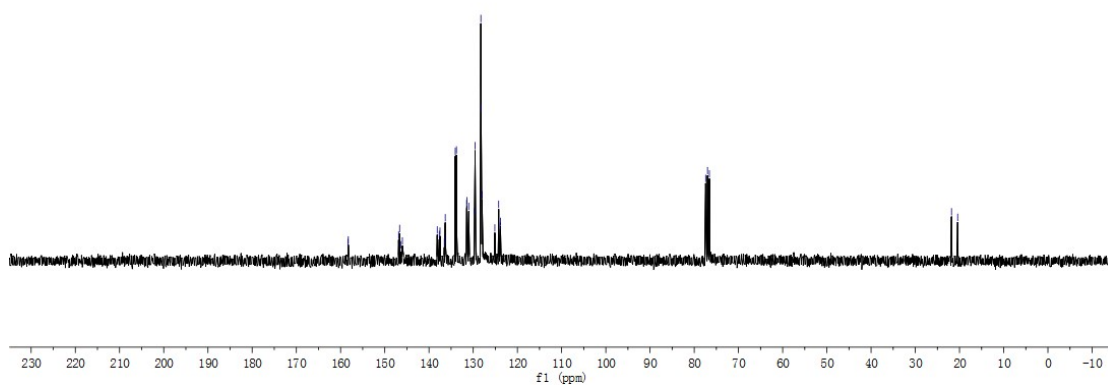

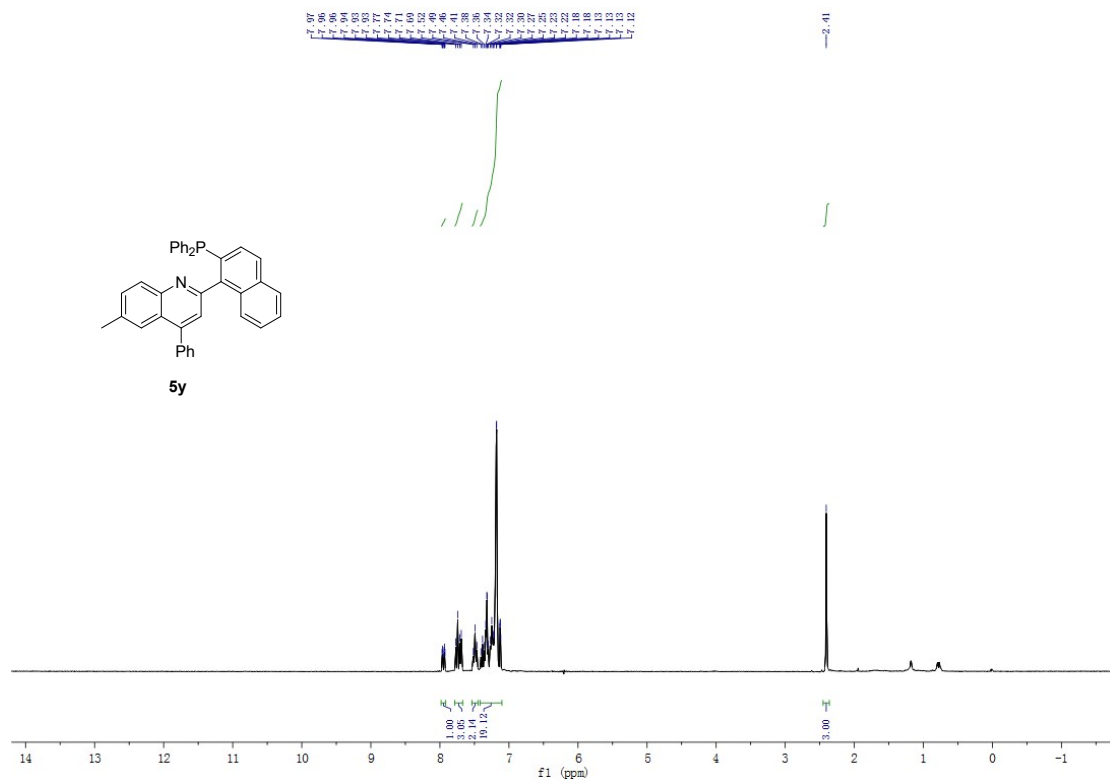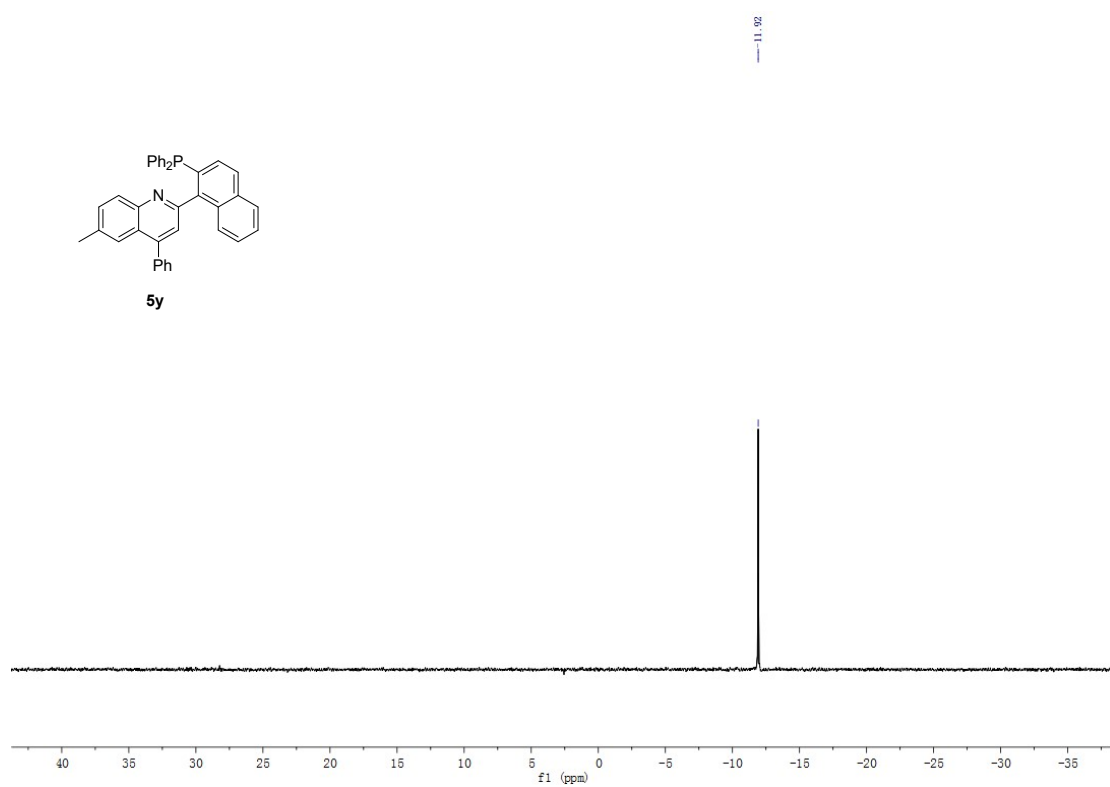

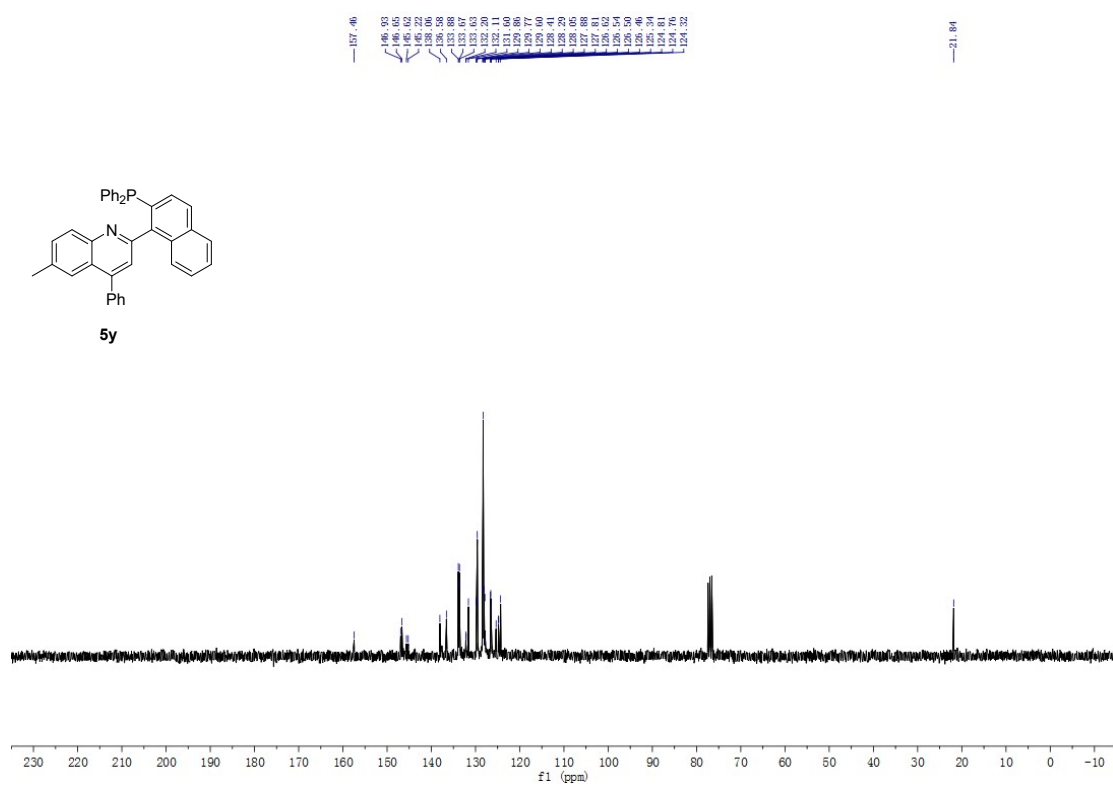

Supplement: d1ob02504j2.pdf [file d1ob02504j2.pdf]
